# Supplementary material for: The electrochemically selective C3-thiolation of quinolines
Source: Royal Society of Chemistry journal article supplement (doi:10.1039/d2qo00148a), 2022-01-01

## Supporting Information

### Electrochemical selective C3-thiolation of quinolines

Dahan Wang,<sup>a</sup> Li Zhang,<sup>b</sup> Fuhong Xiao,<sup>\*a</sup> Guojiang Mao,<sup>c</sup> and Guo-Jun Deng<sup>\*a</sup>

<sup>a</sup> Key Laboratory of Environmentally Friendly Chemistry and Application of Ministry of Education, Key Laboratory for Green Organic Synthesis and Application of Hunan Province, College of Chemistry, Xiangtan University, Xiangtan 411105, China.

<sup>b</sup> College of Chemistry and Materials Engineering, Huaihua University, Huaihua 418000, PR China

<sup>c</sup> School of Chemistry and Chemical Engineering, Henan Normal University Xinxiang, 453007, P. R. China

E-mail: fhxiao@xtu.edu.cn; gjdeng@xtu.edu.cn;

### Table of Contents

|                                                                                   |              |
|-----------------------------------------------------------------------------------|--------------|
| <b>1. General information</b>                                                     | <b>2</b>     |
| <b>2. Reaction optimization</b>                                                   | <b>2-4</b>   |
| <b>3. Cyclic voltammetry experiments</b>                                          | <b>4-5</b>   |
| <b>4. General procedure</b>                                                       | <b>5</b>     |
| <b>5. Characterization data of products</b>                                       | <b>6-20</b>  |
| <b>6. Copies of <sup>1</sup>H and <sup>13</sup>C NMR spectra for all products</b> | <b>21-69</b> |

## 1. General information

All reactions were carried out under an atmosphere of oxygen unless otherwise noted. Column chromatography was performed using silica gel (200-300 mesh).  $^1\text{H}$  NMR and  $^{13}\text{C}$  NMR spectra were recorded on Bruker-AV (400 and 100 MHz, respectively) instrument using  $\text{CDCl}_3$  as solvent and TMS as an internal standard. Mass spectra were measured on Agilent 5975 GC-MS instrument (EI). High-resolution mass spectra (HRMS) was performed on Agilent 6230 TOF LC/MS. The structures of known compounds were further corroborated by comparing their  $^1\text{H}$  NMR,  $^{13}\text{C}$  NMR data and MS data with those of literature. Most reagents were obtained from commercial suppliers and used without further purification.

## 2 Reaction optimization

**Table S1 Optimization of acid**

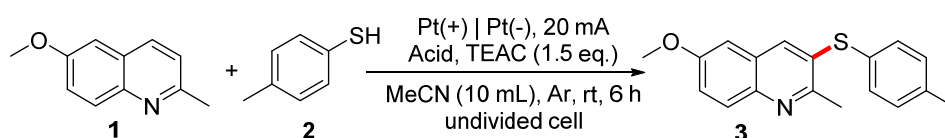

| Entry | Acid (equiv.)                                        | Yield (%) |
|-------|------------------------------------------------------|-----------|
| 1     | none                                                 | 0         |
| 2     | AcOH (1.5)                                           | 0         |
| 3     | TFA (1.5)                                            | 0         |
| 4     | PhCO <sub>2</sub> H (1.5)                            | 0         |
| 5     | MsOH (1.5)                                           | 0         |
| 6     | FeCl <sub>3</sub> (0.2)                              | 0         |
| 7     | Cu(OAc) <sub>2</sub> (0.2)                           | 0         |
| 8     | B(C <sub>6</sub> F <sub>5</sub> ) <sub>3</sub> (0.2) | 0         |
| 9     | BF <sub>3</sub> •OEt <sub>2</sub> (1.5)              | 81        |
| 10    | BF <sub>3</sub> •OEt <sub>2</sub> (2.0)              | 65        |
| 11    | BF <sub>3</sub> •OEt <sub>2</sub> (1.0)              | 73        |

**Table S1 Optimization of electrolyte e**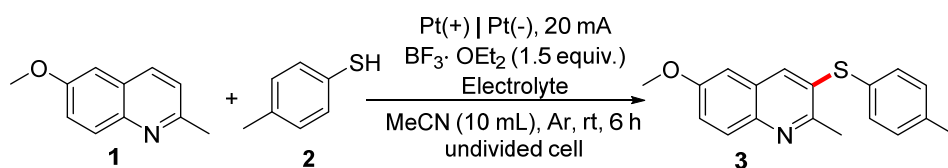

| Entry | Electrolyte (equiv.)                             | Yield (%) |
|-------|--------------------------------------------------|-----------|
| 1     | <i>n</i> -Bu <sub>4</sub> NPF <sub>6</sub> (1.5) | 0         |
| 2     | <i>n</i> -Bu <sub>4</sub> NBF <sub>4</sub> (1.5) | 0         |
| 3     | LiClO <sub>4</sub> (1.5)                         | 0         |
| 4     | TBAI (1.5)                                       | 41        |
| 5     | TBAB (1.5)                                       | 56        |
| 6     | TABC (1.5)                                       | 63        |
| 7     | NH <sub>4</sub> Cl (1.5)                         | trace     |
| 8     | NaCl (1.5)                                       | 35        |
| 9     | Et <sub>4</sub> NClO <sub>4</sub> (1.5)          | 47        |
| 10    | TEAC (1.5)                                       | 81        |
| 11    | TEAC (2.0)                                       | 80        |
| 12    | TEAC (1.0)                                       | 72        |

**Table S3 Optimization of solvent**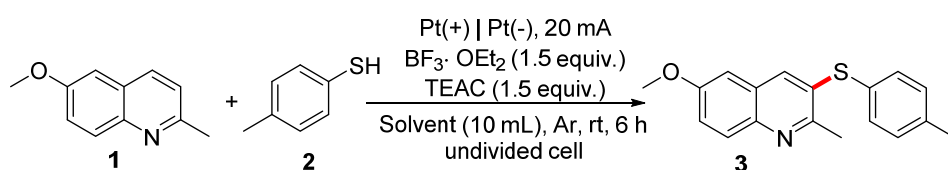

| Entry | Solvent (mL)        | Yield (%) |
|-------|---------------------|-----------|
| 1     | MeOH (10 mL)        | 0         |
| 2     | Acetone (10 mL)     | 22        |
| 3     | DMF (10 mL)         | 0         |
| 4     | DMSO (10 mL)        | 0         |
| 5     | THF (10 mL)         | 0         |
| 6     | 1,4-Dioxane (10 mL) | 0         |

|    |                          |       |
|----|--------------------------|-------|
| 7  | DCM (10 mL)              | 0     |
| 8  | H <sub>2</sub> O (10 mL) | 0     |
| 9  | MeCN (10 mL)             | 81    |
| 10 | MeCN/HFIP (8:2 mL)       | 0     |
| 11 | MeCN/THF (8:2 mL)        | 0     |
| 12 | MeCN/DCM (8:2 mL)        | Trace |
| 13 | MeCN/DMSO (8:2 mL)       | Trace |
| 14 | MeCN/Acetone (8:2 mL)    | 45    |
| 15 | MeCN/DMF (8:2 mL)        | Trace |

**Table S4 Optimization of electricity amount**

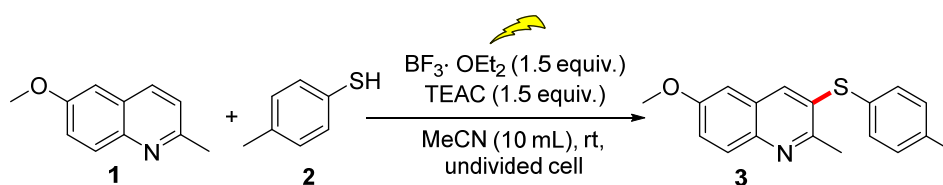

| Entre | Anode | Cathode | Current (mA) | Time (h) | Yield (%) |
|-------|-------|---------|--------------|----------|-----------|
| 1     | Pt    | Pt      | 20           | 6        | 81        |
| 2     | Pt    | Pt      | 20           | 10       | 81        |
| 3     | Pt    | Pt      | 20           | 4        | 67        |
| 4     | Pt    | Pt      | 25           | 6        | 62        |
| 5     | Pt    | Pt      | 15           | 6        | 51        |
| 6     | Pt    | Pt      | 15           | 16       | 57        |
| 7     | Pt    | C       | 20           | 6        | none      |
| 8     | C     | C       | 20           | 6        | none      |
| 9     | Pt    | Fe      | 20           | 6        | none      |
| 10    | Pt    | Cu      | 20           | 6        | none      |

### 3. cyclic voltammetry experiments

Cyclic voltammograms of substrates in 0.1 M TEAC (MeCN), using a glassy carbon working electrode and Pt wire and Ag/AgNO<sub>3</sub> (0.1 M in MeCN) as counter and reference electrodes at a 100 mVs<sup>-1</sup> scan rate:

Fig 1. 6-methoxy-2-methylquinoline (**1a**) (0.1 mM);

Fig 2. **1a** (0.1 mM) and  $\text{BF}_3 \cdot \text{OEt}_2$  (0.15 mM);

Fig 3. *p*-toluenethiol (**2a**) (0.25 mM);

Fig 4. Mixture of **1a** (0.1 mM), *p*-toluenethiol (**2a**) (0.25 mM) and BF<sub>3</sub>•OEt<sub>2</sub> (0.15 mM).

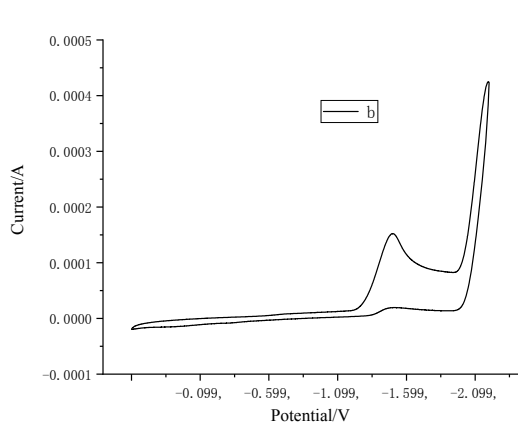

Fig 1

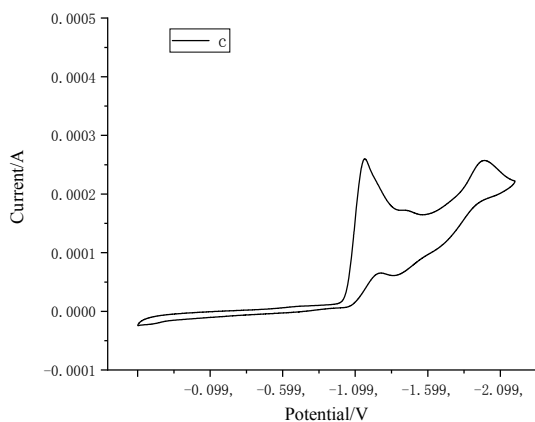

Fig 2

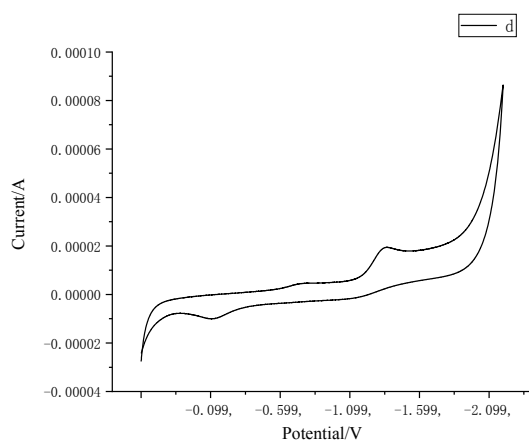

Fig 3

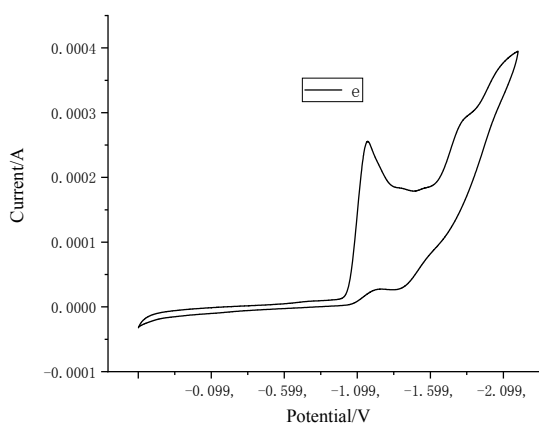

Fig 4

#### 4. General procedure

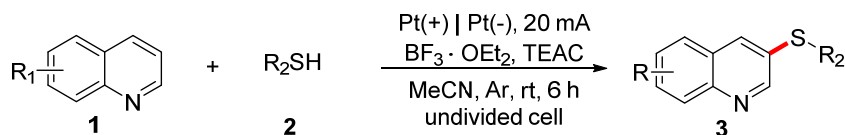

A 10 mL reaction three-necked flask (Figure S1) was charged with **1** (0.5 mmol), **2** RSH (1.25 mmol) or R<sub>2</sub>XXR<sub>2</sub> (0.75 mmol), TEAC (0.5 mmol), the flask was equipped with a reticulated vitreous platinum plate (10 mm x 10 mm x 0.2 mm) anode and a platinum plate (10 mm x 10 mm x 0.2 mm) cathode and then flushed with argon, dry MeCN (10 mL) and BF<sub>3</sub>•OEt<sub>2</sub> (0.75 mmol) was added. The electrolysis was carried out at room temperature using a constant current of 20 mA until complete consumption of the substrate. The reaction mixture was concentrated under reduced pressure and the residue was chromatographed through silica gel elutin

with ethyl acetate/hexane to give the desired product.

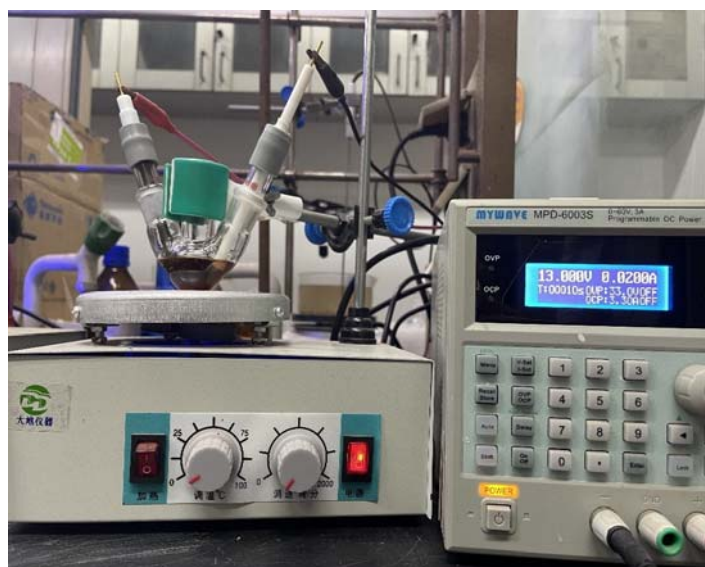

Fig 5. Electrolysis cell for reactions

## 5. Analytical data for the compounds prepared

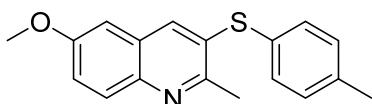

**6-Methoxy-2-methyl-3-(*p*-tolylthio)quinoline (3aa):** 119.4 mg, 81%, yellow solid. Mp: 80 - 82 °C.

<sup>1</sup>H NMR (400 MHz, Chloroform-*d*) δ 7.87 (d, *J* = 9.2 Hz, 1H), 7.59 (s, 1H), 7.31 (d, *J* = 8.0 Hz, 2H), 7.28 – 7.24 (m, 1H), 7.20 (d, *J* = 7.9 Hz, 2H), 6.83 (d, *J* = 2.8 Hz, 1H), 3.85 (s, 3H), 2.72 (s, 3H), 2.38 (s, 3H). <sup>13</sup>C NMR (100 MHz, Chloroform-*d*) δ 157.3, 154.7, 141.9, 138.2, 134.0, 132.6, 131.7, 130.4, 129.6, 128.9, 128.2, 121.4, 104.1, 55.3, 23.4, 21.1. HRMS (ESI) *m/z* calcd for C<sub>18</sub>H<sub>18</sub>NOS<sup>+</sup> (M+H)<sup>+</sup> 296.1104, found 296.1114.

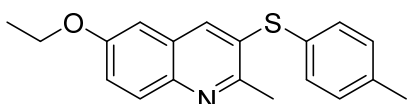

**6-Ethoxy-2-methyl-3-(*p*-tolylthio)quinoline (3ba):** 114.3 mg, 74%, white solid. Mp: 125 - 127 °C.

<sup>1</sup>H NMR (400 MHz, Chloroform-*d*) δ 7.86 (d, *J* = 9.1 Hz, 1H), 7.56 (s, 1H), 7.32 – 7.22 (m, 3H), 7.18 (d, *J* = 7.9 Hz, 2H), 6.80 (d, *J* = 2.7 Hz, 1H), 4.03 (q, *J* = 7.0 Hz, 2H), 2.71 (s, 3H), 2.36 (s, 3H), 1.42 (t, *J* = 7.0 Hz, 3H). <sup>13</sup>C NMR (100 MHz, Chloroform-*d*) δ 156.7, 154.8, 142.0, 138.2, 134.2, 132.5, 131.6, 130.4, 129.6, 129.1, 128.2, 121.8, 104.9, 63.6, 23.5, 21.1, 14.6. HRMS (ESI) *m/z* calcd for C<sub>19</sub>H<sub>20</sub>NOS<sup>+</sup> (M+H)<sup>+</sup> 310.1260, found 310.1273.

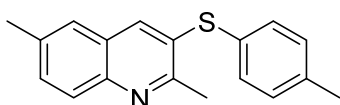

**2,6-Dimethyl-3-(*p*-tolylthio)quinoline (3ca):** 76.6 mg, 55%, white solid. Mp: 91 – 93 °C.

<sup>1</sup>H NMR (400 MHz, Chloroform-*d*) δ 7.87 (d, *J* = 8.6 Hz, 1H), 7.62 (s, 1H), 7.46 – 7.40 (m, 1H), 7.36 – 7.24 (m, 3H),

7.17 (d,  $J = 7.9$  Hz, 2H), 2.74 (s, 3H), 2.44 (s, 3H), 2.36 (s, 3H).  $^{13}\text{C}$  NMR (100 MHz, Chloroform- $d$ )  $\delta$  156.8, 144.6, 138.2, 135.9, 135.1, 132.4, 131.3, 131.2, 130.4, 129.2, 127.9, 127.3, 125.5, 23.7, 21.4, 21.1. HRMS (ESI)  $m/z$  calcd for  $\text{C}_{18}\text{H}_{18}\text{NS}^+$  ( $\text{M}+\text{H}$ ) $^+$  280.1154, found 280.1167.

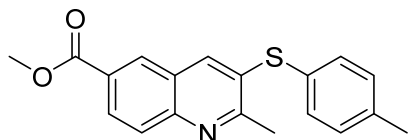

**Methyl 2-methyl-3-(*p*-tolylthio)quinoline-6-carboxylate (3da)** : 84.2 mg, 56%, yellow solid. Mp: 92 – 94 °C.

$^1\text{H}$  NMR (400 MHz, Chloroform- $d$ )  $\delta$  8.29 (d,  $J = 1.9$  Hz, 1H), 8.20 – 8.15 (m, 1H), 7.99 (d,  $J = 8.8$  Hz, 1H), 7.58 (s, 1H), 7.38 (d,  $J = 7.9$  Hz, 2H), 7.28 – 7.25 (m, 2H), 3.94 (s, 3H), 2.80 (s, 3H), 2.43 (s, 3H).  $^{13}\text{C}$  NMR (100 MHz, Chloroform- $d$ )  $\delta$  166.6, 159.4, 147.4, 139.4, 135.9, 134.1, 133.9, 130.8, 129.6, 128.6, 128.2, 127.5, 127.5, 126.5, 52.3, 24.0, 21.3. HRMS (ESI)  $m/z$  calcd for  $\text{C}_{19}\text{H}_{18}\text{NO}_2\text{S}^+$  ( $\text{M}+\text{H}$ ) $^+$  324.1053, found 324.1067.

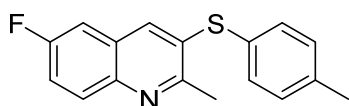

**6-Fluoro-2-methyl-3-(*p*-tolylthio)quinoline (3ea)** : 79.2 mg, 56%, white solid. Mp: 93 - 95 °C.

$^1\text{H}$  NMR (400 MHz, Chloroform- $d$ )  $\delta$  8.00 – 7.91 (m, 1H), 7.49 (s, 1H), 7.39 – 7.33 (m, 3H), 7.28 – 7.23 (m, 2H), 7.18 – 7.14 (m, 1H), 2.75 (s, 3H), 2.41 (s, 3H).  $^{13}\text{C}$  NMR (100 MHz, Chloroform- $d$ )  $\delta$  161.4, 157.6 (d,  $J = 269.0$  Hz), 142.7, 139.0, 133.7, 133.6, 132.8 (d,  $J = 5.1$  Hz), 130.7, 130.7 (d,  $J = 9.3$  Hz), 127.9, 127.8 (d,  $J = 2.3$  Hz), 118.6 (d,  $J = 25.5$  Hz), 109.6 (d,  $J = 21.8$  Hz), 23.6, 21.2. HRMS (ESI)  $m/z$  calcd for  $\text{C}_{17}\text{H}_{15}\text{FNS}^+$  ( $\text{M}+\text{H}$ ) $^+$  284.0904, found 284.0918.

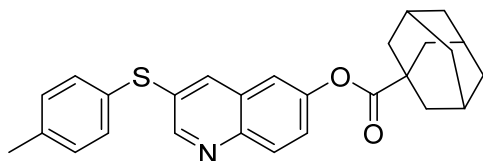

**3-(*p*-Tolylthio)quinolin-6-yl adamantane-1-carboxylate (3fa)** : 90.1 mg, 42%, white solid. Mp: 141 - 143 °C.

$^1\text{H}$  NMR (400 MHz, Chloroform- $d$ )  $\delta$  8.73 (d,  $J = 2.2$  Hz, 1H), 8.04 (d,  $J = 8.9$  Hz, 1H), 7.78 (d,  $J = 2.2$  Hz, 1H), 7.39 – 7.31 (m, 4H), 7.19 (d,  $J = 7.9$  Hz, 2H), 2.38 (s, 3H), 2.12 – 2.06 (m, 9H), 1.82 – 1.74 (m, 6H).  $^{13}\text{C}$  NMR (100 MHz, Chloroform- $d$ )  $\delta$  176.1, 150.5, 149.5, 144.1, 138.8, 134.1, 133.0, 132.7, 130.6, 130.5, 128.9, 128.6, 124.4, 117.6, 41.1, 38.7, 36.4, 27.8, 21.2. HRMS (ESI)  $m/z$  calcd for  $\text{C}_{27}\text{H}_{28}\text{NO}_2\text{S}^+$  ( $\text{M}+\text{H}$ ) $^+$  430.1835, found 430.1848.

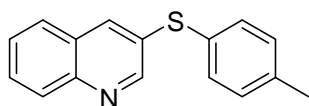

**3-(p-Tolylthio)quinoline (3ga):** 59.0 mg, 47%, yellow oil.<sup>[1]</sup>

<sup>1</sup>H NMR (400 MHz, Chloroform-*d*)  $\delta$  8.78 (d,  $J = 2.3$  Hz, 1H), 8.09 – 8.02 (m, 1H), 7.95 (d,  $J = 2.3$  Hz, 1H), 7.68 – 7.63 (m, 2H), 7.53 – 7.48 (m, 1H), 7.36 – 7.32 (m, 2H), 7.16 (d,  $J = 7.9$  Hz, 2H), 2.35 (s, 3H). <sup>13</sup>C NMR (100 MHz, Chloroform-*d*)  $\delta$  151.4, 146.3, 138.3, 135.5, 132.3, 131.2, 130.3, 129.8, 129.2, 129.2, 128.2, 127.1, 127.1, 21.1.

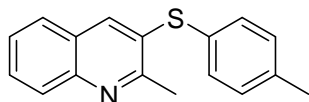

**2-Methyl-3-(p-tolylthio)quinoline (3ha) :** 79.4 mg, 60%, white solid. Mp: 62 - 64 °C.

<sup>1</sup>H NMR (400 MHz, Chloroform-*d*)  $\delta$  8.02 – 7.95 (m, 1H), 7.70 (s, 1H), 7.65 – 7.53 (m, 2H), 7.46 – 7.37 (m, 1H), 7.33 – 7.27 (m, 2H), 7.19 (d,  $J = 8.0$  Hz, 2H), 2.77 (s, 3H), 2.38 (s, 3H). <sup>13</sup>C NMR (100 MHz, Chloroform-*d*)  $\delta$  157.8, 146.0, 138.3, 135.4, 132.6, 131.5, 130.5, 129.0, 128.3, 127.3, 126.6, 126.1, 23.8, 21.2. HRMS (ESI)  $m/z$  calcd for C<sub>17</sub>H<sub>16</sub>NS<sup>+</sup> (M+H)<sup>+</sup> 266.0998, found 266.1012.

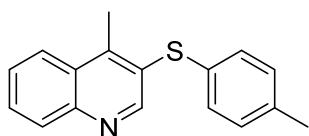

**4-Methyl-3-(p-tolylthio)quinoline (3ia) :** 69 mg, 52%, yellow solid. Mp: 109 - 111 °C.

<sup>1</sup>H NMR (400 MHz, Chloroform-*d*)  $\delta$  8.76 (s, 1H), 8.09 – 8.02 (m, 2H), 7.73 – 7.67 (m, 1H), 7.61 – 7.56 (m, 1H), 7.14 (d,  $J = 8.4$  Hz, 2H), 7.08 (d,  $J = 8.1$  Hz, 2H), 2.82 (s, 3H), 2.30 (s, 3H). <sup>13</sup>C NMR (100 MHz, Chloroform-*d*)  $\delta$  153.7, 146.8, 146.0, 136.9, 131.9, 130.1, 130.0, 129.8, 129.3, 128.1, 126.9, 124.0, 21.0, 16.0. HRMS (ESI)  $m/z$  calcd for C<sub>17</sub>H<sub>16</sub>NS<sup>+</sup> (M+H)<sup>+</sup> 266.0998, found 266.1013.

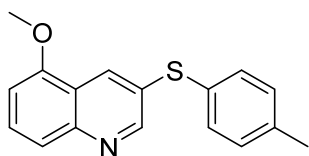

**5-Methoxy-3-(p-tolylthio)quinoline (3ja) :** 49.1 mg, 35%, yellow oil.

<sup>1</sup>H NMR (400 MHz, Chloroform-*d*)  $\delta$  8.77 (d,  $J = 2.3$  Hz, 1H), 8.53 (d,  $J = 2.5$  Hz, 1H), 7.64 (d,  $J = 8.4$  Hz, 1H), 7.57 (t,  $J = 8.1$  Hz, 1H), 7.31 – 7.27 (m, 2H), 7.13 (d,  $J = 7.9$  Hz, 2H), 6.84 (d,  $J = 7.6$  Hz, 1H), 3.96 (s, 3H), 2.33 (s, 3H). <sup>13</sup>C NMR (100 MHz, Chloroform-*d*)  $\delta$  154.6, 152.5, 147.3, 137.7, 132.2, 131.4, 131.0, 130.2, 129.5, 129.4, 121.2, 120.6, 104.9, 55.7, 21.1. HRMS (ESI)  $m/z$  calcd for C<sub>17</sub>H<sub>16</sub>NOS<sup>+</sup> (M+H)<sup>+</sup> 282.0947, found 282.0965.



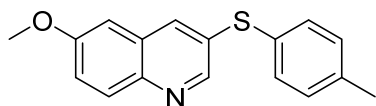

**6-Methoxy-3-(*p*-tolylthio)quinoline (3ka):** 94.1 mg, 67%, yellow solid. Mp: 105 - 107 °C.

<sup>1</sup>H NMR (400 MHz, Chloroform-*d*) δ 8.62 (d, *J* = 2.3 Hz, 1H), 7.93 (d, *J* = 9.2 Hz, 1H), 7.84 – 7.80 (m, 1H), 7.36 – 7.28 (m, 3H), 7.16 (d, *J* = 7.9 Hz, 2H), 6.90 (d, *J* = 2.8 Hz, 1H), 3.87 (s, 3H), 2.35 (s, 3H). <sup>13</sup>C NMR (100 MHz, Chloroform-*d*) δ 158.1, 148.7, 142.5, 138.2, 134.2, 132.4, 131.6, 130.5, 130.3, 129.8, 129.3, 121.9, 104.4, 55.4, 21.1. HRMS (ESI) *m/z* calcd for C<sub>17</sub>H<sub>16</sub>NOS<sup>+</sup> (M+H)<sup>+</sup> 281.0947, found 281.0960.

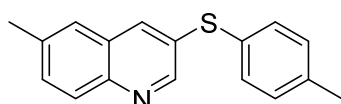

**6-Methyl-3-(*p*-tolylthio)quinoline (3la):** 75.5 mg, 57%, white solid. Mp: 68 - 70 °C.

<sup>1</sup>H NMR (400 MHz, Chloroform-*d*) δ 8.71 (d, *J* = 2.2 Hz, 1H), 7.94 (d, *J* = 8.6 Hz, 1H), 7.86 (d, *J* = 2.2 Hz, 1H), 7.48 (dd, *J* = 8.6, 1.9 Hz, 1H), 7.41 (s, 1H), 7.32 (d, *J* = 8.1 Hz, 2H), 7.15 (d, *J* = 7.9 Hz, 2H), 2.48 (s, 3H), 2.34 (s, 3H). <sup>13</sup>C NMR (100 MHz, Chloroform-*d*) δ 150.6, 145.0, 138.1, 137.1, 135.1, 132.1, 131.5, 130.9, 130.3, 130.0, 128.8, 128.2, 125.9, 21.5, 21.1. HRMS (ESI) *m/z* calcd for C<sub>17</sub>H<sub>16</sub>NS<sup>+</sup> (M+H)<sup>+</sup> 266.0998, found 266.1014.

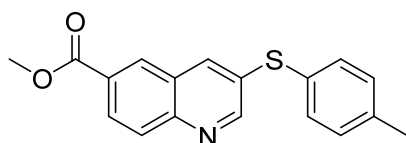

**Methyl 3-(*p*-tolylthio)quinoline-6-carboxylate (3ma):** 61.7 mg, 40%, yellow solid. Mp: 93 - 95 °C.

<sup>1</sup>H NMR (400 MHz, Chloroform-*d*) δ 8.82 (d, *J* = 2.3 Hz, 1H), 8.40 (d, *J* = 1.9 Hz, 1H), 8.24 – 8.19 (m, 1H), 8.07 (d, *J* = 8.8 Hz, 1H), 7.90 (d, *J* = 2.3 Hz, 1H), 7.42 – 7.37 (m, 2H), 7.22 (d, *J* = 7.9 Hz, 2H), 3.97 (s, 3H), 2.39 (s, 3H). <sup>13</sup>C NMR (100 MHz, Chloroform-*d*) δ 166.4, 152.7, 147.9, 139.1, 135.0, 133.4, 133.3, 130.6, 130.0, 129.5, 128.6, 128.5, 128.4, 127.4, 52.4, 21.2. HRMS (ESI) *m/z* calcd for C<sub>18</sub>H<sub>16</sub>NO<sub>2</sub>S<sup>+</sup> (M+H)<sup>+</sup> 310.0896, found 310.0924.

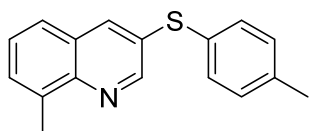

**8-Methyl-3-(*p*-tolylthio)quinoline (3na):** 33.1 mg, 25%, yellow oil.

<sup>1</sup>H NMR (400 MHz, Chloroform-*d*) δ 8.78 (d, *J* = 2.3 Hz, 1H), 7.97 (d, *J* = 2.3 Hz, 1H), 7.54 – 7.50 (m, 2H), 7.41 (t, *J* = 7.6 Hz, 1H), 7.36 – 7.32 (m, 2H), 7.16 (d, *J* = 7.9 Hz, 2H), 2.77 (s, 3H), 2.36 (s, 3H). <sup>13</sup>C NMR (100 MHz, Chloroform-*d*) δ 150.4, 145.5, 138.2, 137.1, 136.1, 135.4, 132.3, 130.8, 130.3, 129.6, 128.2, 127.0, 125.2, 21.1, 18.0. HRMS (ESI) *m/z* calcd for C<sub>17</sub>H<sub>16</sub>NS<sup>+</sup> (M+H)<sup>+</sup> 266.0998, found 266.1014.

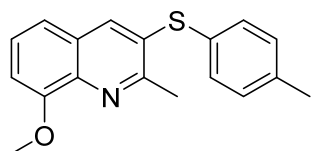

**8-Methoxy-2-methyl-3-(*p*-tolylthio)quinoline (30a)** : 45.7 mg, 45%, yellow solid. Mp: 116 - 118 °C.

<sup>1</sup>H NMR (400 MHz, Chloroform-*d*) δ 7.65 (s, 1H), 7.36 – 7.26 (m, 3H), 7.21 – 7.13 (m, 3H), 6.97 (dd, *J* = 7.8, 1.2 Hz, 1H), 4.06 (s, 3H), 2.81 (s, 3H), 2.38 (s, 3H). <sup>13</sup>C NMR (100 MHz, Chloroform-*d*) δ 156.6, 154.6, 138.4, 137.6, 135.0, 132.7, 132.4, 130.5, 128.7, 128.5, 126.2, 118.6, 107.1, 55.9, 24.2, 21.2. HRMS (ESI) *m/z* calcd for C<sub>18</sub>H<sub>18</sub>NOS<sup>+</sup> (M+H)<sup>+</sup> 296.1104, found 296.1121.

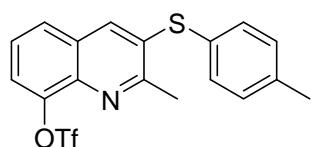

**2-Methyl-3-(*p*-tolylthio)quinolin-8-yl trifluoromethanesulfonate (3pa)** : 51.6 mg, 25%, yellow solid. Mp: 71 - 73 °C.

<sup>1</sup>H NMR (400 MHz, Chloroform-*d*) δ 7.55 – 7.51 (m, 1H), 7.50 – 7.44 (m, 2H), 7.43 – 7.35 (m, 3H), 7.30 – 7.25 (m, 2H), 2.81 (s, 3H), 2.43 (s, 3H). <sup>13</sup>C NMR (100 MHz, CDCl<sub>3</sub>) δ 158.4, 145.5, 139.6, 138.0, 135.7, 134.3, 131.8, 130.9, 128.9, 127.0, 126.7, 125.4, 120.5, 119.9, 24.0, 21.3. HRMS (ESI) *m/z* calcd for C<sub>18</sub>H<sub>15</sub>F<sub>3</sub>NO<sub>3</sub>S<sub>2</sub><sup>+</sup> (M+H)<sup>+</sup> 414.0440, found 414.0466.

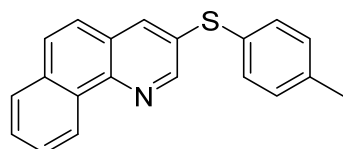

**3-(*p*-Tolylthio)benzo[*h*]quinoline (3qa)** : 52.9 mg, 35%, yellow solid. Mp: 117 - 119 °C.

<sup>1</sup>H NMR (400 MHz, Chloroform-*d*) δ 9.20 (d, *J* = 8.0 Hz, 1H), 8.85 (d, *J* = 2.3 Hz, 1H), 8.01 (d, *J* = 2.3 Hz, 1H), 7.91 – 7.86 (m, 1H), 7.78 (d, *J* = 8.8 Hz, 1H), 7.74 – 7.66 (m, 2H), 7.55 (d, *J* = 8.8 Hz, 1H), 7.37 (d, *J* = 7.9 Hz, 2H), 7.18 (d, *J* = 7.8 Hz, 2H), 2.36 (s, 3H). <sup>13</sup>C NMR (100 MHz, Chloroform-*d*) δ 149.7, 144.6, 138.3, 135.9, 133.4, 132.4, 132.0, 131.2, 130.4, 130.1, 128.5, 128.2, 127.8, 127.3, 126.4, 124.7, 124.2, 21.2. HRMS (ESI) *m/z* calcd for C<sub>20</sub>H<sub>16</sub>NS<sup>+</sup> (M+H)<sup>+</sup> 302.0998, found 302.1013.

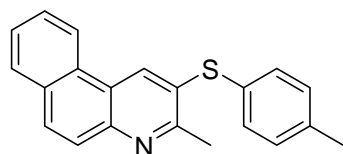

**3-Methyl-2-(*p*-tolylthio)benzo[*f*]quinoline (3ra)** : 74.1 mg, 41%, yellow solid. Mp: 121 - 123 °C.

<sup>1</sup>H NMR (400 MHz, Chloroform-*d*) δ 8.60 (s, 1H), 8.28 – 8.22 (m, 1H), 7.92 – 7.83 (m, 3H), 7.61 – 7.53 (m, 2H),

7.31 – 7.26 (m, 2H), 7.18 (d,  $J = 8.0$  Hz, 2H), 2.79 (s, 3H), 2.37 (s, 3H).  $^{13}\text{C}$  NMR (100 MHz, Chloroform- $d$ )  $\delta$  157.8, 146.0, 137.9, 132.2, 131.7, 131.4, 130.6, 130.6, 130.4, 129.9, 128.9, 128.5, 127.3, 127.0, 126.9, 124.1, 122.3, 23.6, 21.2. HRMS (ESI)  $m/z$  calcd for  $\text{C}_{21}\text{H}_{18}\text{NS}^+$  ( $\text{M}+\text{H}$ ) $^+$  316.1154, found 316.1176.

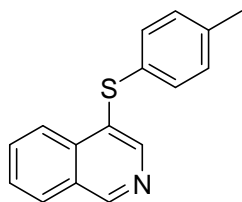

**4-(*p*-Tolylthio)isoquinoline (3sa)** : 43.9 mg, 35%, yellow oil.<sup>[1]</sup>

$^1\text{H}$  NMR (400 MHz, Chloroform- $d$ )  $\delta$  9.19 (s, 1H), 8.56 (s, 1H), 8.27 (dd,  $J = 8.6, 1.2$  Hz, 1H), 8.03 – 7.96 (m, 1H), 7.75 – 7.70 (m, 1H), 7.66 – 7.61 (m, 1H), 7.21 – 7.15 (m, 2H), 7.07 (d,  $J = 8.0$  Hz, 2H), 2.29 (s, 3H).  $^{13}\text{C}$  NMR (100 MHz, Chloroform- $d$ )  $\delta$  152.6, 146.8, 137.0, 135.9, 131.3, 131.1, 130.1, 130.0, 128.8, 128.1, 127.7, 127.4, 124.5, 21.0.

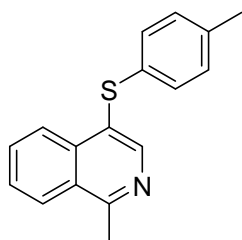

**1-Methyl-4-(*p*-tolylthio)isoquinoline (3ta)** : 62.3 mg, 47%, yellow solid. Mp: 88 - 90 °C.

$^1\text{H}$  NMR (400 MHz, Chloroform- $d$ )  $\delta$  8.56 (s, 1H), 8.29 (d,  $J = 8.4$  Hz, 1H), 8.12 (d,  $J = 8.3$  Hz, 1H), 7.71 – 7.65 (m, 1H), 7.63 – 7.57 (m, 1H), 7.09 (d,  $J = 8.1$  Hz, 2H), 7.01 (d,  $J = 8.0$  Hz, 2H), 2.97 (s, 3H), 2.25 (s, 3H).  $^{13}\text{C}$  NMR (100 MHz, Chloroform- $d$ )  $\delta$  159.8, 147.1, 136.2, 136.2, 132.5, 130.7, 129.8, 128.8, 127.8, 127.4, 126.1, 125.4, 124.4, 22.6, 20.9. HRMS (ESI)  $m/z$  calcd for  $\text{C}_{17}\text{H}_{16}\text{NS}^+$  ( $\text{M}+\text{H}$ ) $^+$  266.0998, found 266.1013.

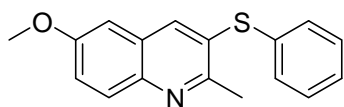

**6-Methoxy-2-methyl-3-(phenylthio)quinoline (3ab)** : 106.7 mg, 86%, yellow solid. Mp: 105 - 107 °C.

$^1\text{H}$  NMR (400 MHz, Chloroform- $d$ )  $\delta$  7.89 (d,  $J = 9.2$  Hz, 1H), 7.74 (s, 1H), 7.36 – 7.27 (m, 6H), 6.86 (d,  $J = 2.8$  Hz, 1H), 3.85 (s, 3H), 2.72 (s, 3H).  $^{13}\text{C}$  NMR (100 MHz, Chloroform- $d$ )  $\delta$  157.5, 155.7, 142.4, 136.1, 133.6, 131.4, 130.3, 129.7, 129.5, 128.2, 127.6, 122.0, 104.3, 55.4, 23.5. HRMS (ESI)  $m/z$  calcd for  $\text{C}_{17}\text{H}_{16}\text{NOS}^+$  ( $\text{M}+\text{H}$ ) $^+$  282.0947, found 282.0968.

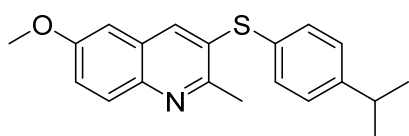

**3-((4-Isopropylphenyl)thio)-6-methoxy-2-methylquinoline (3ac)** : 132.4 mg, 82%, yellow solid. Mp:

56 - 58 °C.

$^1\text{H}$  NMR (400 MHz, Chloroform-*d*)  $\delta$  7.88 (d,  $J = 9.2$  Hz, 1H), 7.65 (s, 1H), 7.35 – 7.23 (m, 5H), 6.84 (d,  $J = 2.8$  Hz, 1H), 3.85 (s, 3H), 2.97 – 2.88 (m, 1H), 2.73 (s, 3H), 1.27 (d,  $J = 6.9$  Hz, 6H).  $^{13}\text{C}$  NMR (100 MHz, Chloroform-*d*)  $\delta$  157.4, 155.2, 149.0, 142.1, 134.7, 132.4, 131.5, 129.7, 129.6, 128.2, 127.8, 121.6, 104.3, 55.4, 33.7, 23.8, 23.5. HRMS (ESI)  $m/z$  calcd for  $\text{C}_{20}\text{H}_{22}\text{NOS}^+$  (M+H) $^+$  324.1417, found 324.1439.

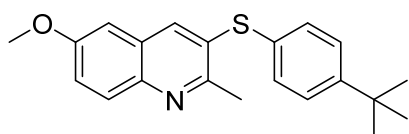

**3-((4-*tert*-butyl)phenyl)thio)-6-methoxy-2-methylquinoline (3ad)** : 141.5 mg, 84%, yellow solid. Mp: 76 - 78 °C.

$^1\text{H}$  NMR (400 MHz, Chloroform-*d*)  $\delta$  7.88 (d,  $J = 9.2$  Hz, 1H), 7.68 (s, 1H), 7.42 – 7.36 (m, 2H), 7.34 – 7.23 (m, 3H), 6.84 (d,  $J = 2.8$  Hz, 1H), 3.84 (s, 3H), 2.73 (s, 3H), 1.33 (s, 9H).  $^{13}\text{C}$  NMR (100 MHz, Chloroform-*d*)  $\delta$  157.4, 155.3, 151.2, 142.2, 134.9, 131.8, 131.3, 129.7, 129.5, 128.2, 126.6, 121.6, 104.3, 55.4, 34.6, 31.2, 23.6. HRMS (ESI)  $m/z$  calcd for  $\text{C}_{21}\text{H}_{24}\text{NOS}^+$  (M+H) $^+$  338.1573, found 338.1592.

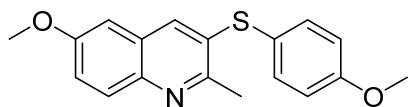

**6-Methoxy-3-((4-methoxyphenyl)thio)-2-methylquinoline (3ae)** : 94.7 mg, 61%, yellow solid. Mp: 119 - 121 °C.

$^1\text{H}$  NMR (400 MHz, Chloroform-*d*)  $\delta$  7.86 (d,  $J = 9.2$  Hz, 1H), 7.47 – 7.42 (m, 2H), 7.37 (s, 1H), 7.26 – 7.21 (m, 1H), 7.01 – 6.96 (m, 2H), 6.79 (d,  $J = 2.8$  Hz, 1H), 3.86 (s, 3H), 3.84 (s, 3H), 2.73 (s, 3H).  $^{13}\text{C}$  NMR (100 MHz, Chloroform-*d*)  $\delta$  160.3, 157.4, 153.8, 141.6, 135.9, 133.7, 131.7, 129.6, 128.3, 121.9, 121.2, 115.4, 104.1, 55.4, 55.4, 23.4. HRMS (ESI)  $m/z$  calcd for  $\text{C}_{18}\text{H}_{18}\text{NO}_2\text{S}^+$  (M+H) $^+$  312.1053, found 312.1074.

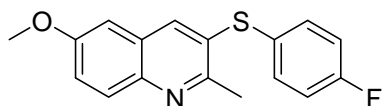

**3-((4-Fluorophenyl)thio)-6-methoxy-2-methylquinoline (3af)** 97.8 mg, 53%, yellow solid. Mp: 128 - 130 °C.

$^1\text{H}$  NMR (400 MHz, Chloroform-*d*)  $\delta$  7.87 (d,  $J = 9.2$  Hz, 1H), 7.57 (s, 1H), 7.44 – 7.36 (m, 2H), 7.31 – 7.25 (m, 1H), 7.09 (t,  $J = 8.6$  Hz, 2H), 6.84 (d,  $J = 2.8$  Hz, 1H), 3.85 (s, 3H), 2.71 (s, 3H).  $^{13}\text{C}$  NMR (100 MHz, Chloroform-*d*)  $\delta$  162.7 (d,  $J = 247.3$  Hz), 157.5, 154.8, 142.1, 134.6 (d,  $J = 8.3$  Hz), 134.4, 131.3, 129.7, 128.2, 128.0 (d,  $J = 3.4$  Hz), 121.8, 117.0 (d,  $J = 21.9$  Hz), 104.2, 55.41, 23.45. HRMS (ESI)  $m/z$  calcd for  $\text{C}_{17}\text{H}_{15}\text{FNOS}^+$  (M+H) $^+$  300.0853,

found 300.0870.

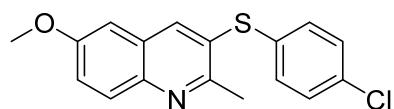

**3-((4-Chlorophenyl)thio)-6-methoxy-2-methylquinoline (3ag)** : 48.0 mg, 31%, yellow solid. Mp: 64 - 66 °C.

$^1\text{H}$  NMR (400 MHz, Chloroform-*d*)  $\delta$  7.89 (d,  $J$  = 9.2 Hz, 1H), 7.76 (s, 1H), 7.35 – 7.29 (m, 3H), 7.27 – 7.23 (m, 2H), 6.89 (d,  $J$  = 2.8 Hz, 1H), 3.87 (s, 3H), 2.71 (s, 3H).  $^{13}\text{C}$  NMR (100 MHz, Chloroform-*d*)  $\delta$  157.6, 155.7, 142.6, 136.6, 133.7, 132.5, 132.4, 129.8, 129.7, 129.5, 128.2, 122.3, 104.3, 55.5, 23.5. HRMS (ESI)  $m/z$  calcd for  $\text{C}_{17}\text{H}_{15}\text{ClNOS}^+$  ( $\text{M}+\text{H}$ ) $^+$  316.0557, found 316.0581.

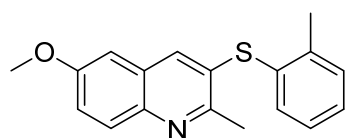

**6-Methoxy-2-methyl-3-(*o*-tolylthio)quinoline (3ah)** : 101.8 mg, 69%, white solid. Mp: 91 - 93 °C.

$^1\text{H}$  NMR (400 MHz, Chloroform-*d*)  $\delta$  7.88 (d,  $J$  = 9.2 Hz, 1H), 7.41 (s, 1H), 7.35 – 7.23 (m, 4H), 7.22 – 7.16 (m, 1H), 6.80 (d,  $J$  = 2.8 Hz, 1H), 3.82 (s, 3H), 2.74 (s, 3H), 2.40 (s, 3H).  $^{13}\text{C}$  NMR (100 MHz, Chloroform-*d*)  $\delta$  157.4, 154.8, 141.9, 140.5, 133.5, 133.4, 131.6, 130.9, 129.7, 128.6, 128.3, 127.1, 121.5, 104.2, 55.4, 23.4, 20.4. HRMS (ESI)  $m/z$  calcd for  $\text{C}_{18}\text{H}_{18}\text{NOS}^+$  ( $\text{M}+\text{H}$ ) $^+$  296.1104, found 296.1123.

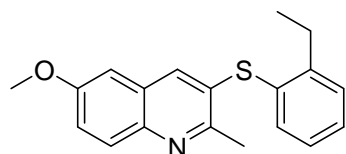

**3-((2-Ethylphenyl)thio)-6-methoxy-2-methylquinoline (3ai)** : 100.4 mg, 65%. yellow solid. Mp: 78 - 80 °C.

$^1\text{H}$  NMR (400 MHz, Chloroform-*d*)  $\delta$  7.88 (d,  $J$  = 9.2 Hz, 1H), 7.43 (s, 1H), 7.39 – 7.31 (m, 2H), 7.26 (ddd,  $J$  = 6.7, 5.2, 2.3 Hz, 2H), 7.21 – 7.17 (m, 1H), 6.80 (d,  $J$  = 2.8 Hz, 1H), 3.83 (s, 3H), 2.81 (q,  $J$  = 7.5 Hz, 2H), 2.74 (s, 3H), 1.23 (t,  $J$  = 7.5 Hz, 3H).  $^{13}\text{C}$  NMR (100 MHz, Chloroform-*d*)  $\delta$  157.4, 154.8, 146.3, 141.9, 133.8, 133.6, 131.6, 131.0, 129.7, 129.3, 128.8, 128.3, 127.1, 121.5, 104.2, 55.4, 27.1, 23.4, 15.0. HRMS (ESI)  $m/z$  calcd for  $\text{C}_{19}\text{H}_{20}\text{NOS}^+$  ( $\text{M}+\text{H}$ ) $^+$  310.1260, found 310.1282.

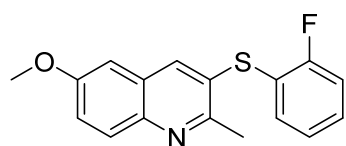

**3-((2-Fluorophenyl)thio)-6-methoxy-2-methylquinoline (3aj)** : 76.2 mg, 51%, yellow solid. Mp: 44 -

46 °C.

$^1\text{H}$  NMR (400 MHz, Chloroform-*d*)  $\delta$  7.90 (d,  $J = 9.1$  Hz, 1H), 7.74 (s, 1H), 7.38 – 7.08 (m, 5H), 6.88 (d,  $J = 2.8$  Hz, 1H), 3.87 (s, 3H), 2.75 (s, 3H).  $^{13}\text{C}$  NMR (100 MHz, Chloroform-*d*)  $\delta$  161.4 (d,  $J = 246.3$  Hz), 157.6, 155.6, 142.6, 136.2, 133.5, 130.0 (d,  $J = 7.7$  Hz), 129.8, 128.6, 128.2, 125.0 (d,  $J = 3.8$  Hz), 122.2, 120.7 (d,  $J = 17.9$  Hz), 116.2 (d,  $J = 21.9$  Hz), 104.3, 55.5, 23.5. HRMS (ESI)  $m/z$  calcd for  $\text{C}_{17}\text{H}_{15}\text{FNOS}^+$  ( $\text{M}+\text{H}$ ) $^+$  300.0853, found 300.0873.

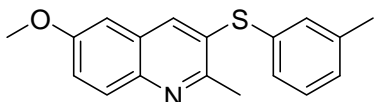

**6-Methoxy-2-methyl-3-(*m*-tolylthio)quinoline (3ak)** : 103.3 mg, 70%, yellow solid. Mp: 38 - 40 °C.

$^1\text{H}$  NMR (400 MHz, Chloroform-*d*)  $\delta$  7.89 (d,  $J = 9.2$  Hz, 1H), 7.73 (s, 1H), 7.33 – 7.22 (m, 2H), 7.21 – 7.10 (m, 3H), 6.88 (d,  $J = 2.8$  Hz, 1H), 3.86 (s, 3H), 2.72 (s, 3H), 2.33 (s, 3H).  $^{13}\text{C}$  NMR (100 MHz, Chloroform-*d*)  $\delta$  157.5, 155.7, 142.4, 139.5, 135.9, 133.2, 132.1, 130.6, 129.7, 129.4, 128.6, 128.6, 128.2, 121.9, 104.3, 55.4, 23.6, 21.3. HRMS (ESI)  $m/z$  calcd for  $\text{C}_{18}\text{H}_{18}\text{NOS}^+$  ( $\text{M}+\text{H}$ ) $^+$  296.1104, found 296.1122.

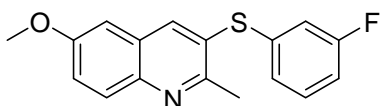

**3-((3-Fluorophenyl)thio)-6-methoxy-2-methylquinoline (3al)** : 73.4 mg, 50%, yellow solid. Mp: 48 - 50 °C.

$^1\text{H}$  NMR (400 MHz, Chloroform-*d*)  $\delta$  7.98 – 7.89 (m, 2H), 7.37 – 7.33 (m, 1H), 7.32 – 7.27 (m, 1H), 7.06 – 7.01 (m, 1H), 6.99 – 6.92 (m, 3H), 3.90 (s, 3H), 2.71 (s, 3H).  $^{13}\text{C}$  NMR (100 MHz, Chloroform-*d*)  $\delta$  163.1 (d,  $J = 247.7$  Hz), 157.7, 156.7, 143.1, 138.8, 137.2 (d,  $J = 7.7$  Hz), 130.7 (d,  $J = 8.7$  Hz), 129.9, 128.2, 128.0, 125.4 (d,  $J = 3.0$  Hz), 122.7, 116.6 (d,  $J = 23.0$  Hz), 114.1 (d,  $J = 21.1$  Hz), 104.5, 55.5, 23.6. HRMS (ESI)  $m/z$  calcd for  $\text{C}_{17}\text{H}_{15}\text{FNOS}^+$  ( $\text{M}+\text{H}$ ) $^+$  300.0853, found 300.0875.

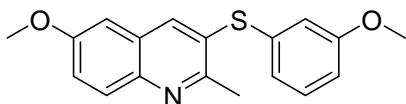

**6-Methoxy-3-((3-methoxyphenyl)thio)-2-methylquinoline (3am)** : 90.2 mg, 58%. white solid. Mp: 59 - 61 °C.

$^1\text{H}$  NMR (400 MHz, Chloroform-*d*)  $\delta$  7.89 (d,  $J = 9.2$  Hz, 1H), 7.80 (s, 1H), 7.33 – 7.23 (m, 2H), 6.93 – 6.82 (m, 4H), 3.87 (s, 3H), 3.76 (s, 3H), 2.72 (s, 3H).  $^{13}\text{C}$  NMR (100 MHz, Chloroform-*d*)  $\delta$  160.3, 157.5, 156.0, 142.6, 136.6, 135.1, 130.3, 129.9, 129.8, 128.2, 123.3, 122.1, 116.3, 113.3, 104.4, 55.4, 55.3, 23.6. HRMS (ESI)  $m/z$  calcd for  $\text{C}_{18}\text{H}_{18}\text{NO}_2\text{S}^+$  ( $\text{M}+\text{H}$ ) $^+$  312.1053, found 312.1073.

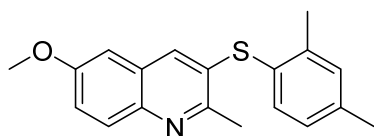

**3-((2,4-Dimethylphenyl)thio)-6-methoxy-2-methylquinoline (3an)** 97.3 mg, 63%, yellow solid. Mp: 120 - 122 °C.

<sup>1</sup>H NMR (400 MHz, Chloroform-*d*) δ 7.86 (d, *J* = 9.2 Hz, 1H), 7.29 (d, *J* = 7.9 Hz, 1H), 7.26 – 7.16 (m, 3H), 7.07 – 7.02 (m, 1H), 6.77 (d, *J* = 2.8 Hz, 1H), 3.82 (s, 3H), 2.75 (s, 3H), 2.37 (s, 3H), 2.35 (s, 3H). <sup>13</sup>C NMR (100 MHz, Chloroform-*d*) δ 157.4, 154.1, 141.6, 141.3, 139.3, 134.8, 132.2, 131.9, 131.5, 129.7, 128.3, 128.0, 127.2, 121.1, 104.1, 55.4, 23.3, 21.1, 20.4. HRMS (ESI) *m/z* calcd for C<sub>19</sub>H<sub>20</sub>NOS<sup>+</sup> (M+H)<sup>+</sup> 310.1260, found 310.1281.

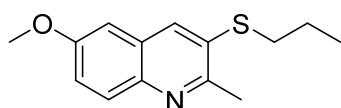

**6-Methoxy-2-methyl-3-(propylthio)quinoline (3ao)** : 87.7 mg, 71%, yellow solid. Mp: 61 - 63 °C.

<sup>1</sup>H NMR (400 MHz, Chloroform-*d*) δ 7.86 (d, *J* = 9.1 Hz, 1H), 7.69 (s, 1H), 7.28 – 7.21 (m, 1H), 6.94 (d, *J* = 2.8 Hz, 1H), 3.89 (s, 3H), 2.96 (t, *J* = 7.3 Hz, 2H), 2.70 (s, 3H), 1.77 (h, *J* = 7.4 Hz, 2H), 1.10 (t, *J* = 7.4 Hz, 3H). <sup>13</sup>C NMR (100 MHz, Chloroform-*d*) δ 157.4, 154.5, 141.0, 132.1, 130.1, 129.6, 128.1, 120.6, 104.0, 55.3, 34.1, 23.3, 21.7, 13.6. HRMS (ESI) *m/z* calcd for C<sub>14</sub>H<sub>18</sub>NOS<sup>+</sup> (M+H)<sup>+</sup> 248.1104, found 248.1127.

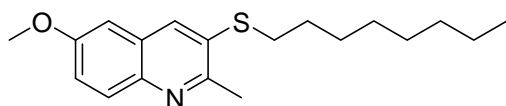

**6-Methoxy-2-methyl-3-(octylthio)quinoline (3ap)** 125.2 mg, 79%, yellow solid. Mp: 53 - 54 °C.

<sup>1</sup>H NMR (400 MHz, Chloroform-*d*) δ 7.86 (d, *J* = 9.2 Hz, 1H), 7.69 (s, 1H), 7.26 – 7.20 (m, 1H), 6.94 (d, *J* = 2.8 Hz, 1H), 3.89 (s, 3H), 2.97 (t, *J* = 7.4 Hz, 2H), 2.70 (s, 3H), 1.78 – 1.68 (m, 2H), 1.48 (p, *J* = 7.0 Hz, 2H), 1.34 – 1.23 (m, 8H), 0.90 – 0.86 (m, 3H). <sup>13</sup>C NMR (100 MHz, Chloroform-*d*) δ 157.4, 154.4, 141.0, 132.3, 130.0, 129.7, 128.2, 120.6, 104.0, 55.3, 32.1, 31.7, 29.1, 29.0, 28.2, 23.3, 22.6, 14.0. HRMS (ESI) *m/z* calcd for C<sub>19</sub>H<sub>28</sub>NOS<sup>+</sup> (M+H)<sup>+</sup> 318.1886, found 318.1902.

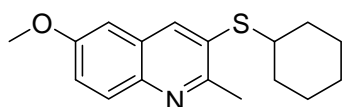

**3-(Cyclohexylthio)-6-methoxy-2-methylquinoline (3aq)** : 104.7 mg, 73%. yellow solid. Mp: 73 - 75 °C.

<sup>1</sup>H NMR (400 MHz, Chloroform-*d*) δ 7.92 – 7.85 (m, 2H), 7.30 – 7.26 (m, 1H), 6.98 (d, *J* = 2.8 Hz, 1H), 3.92 (s, 3H), 3.28 – 3.19 (m, 1H), 2.75 (s, 3H), 2.07 – 2.02 (m, 2H), 1.86 – 1.80 (m, 2H), 1.68 – 1.64 (m, 1H), 1.50 – 1.28 (m, 5H).

$^{13}\text{C}$  NMR (100 MHz, Chloroform-*d*)  $\delta$  157.4, 156.4, 141.8, 134.7, 130.2, 129.7, 128.1, 121.4, 104.2, 55.5, 45.5, 33.0, 26.0, 25.7, 23.8. HRMS (ESI)  $m/z$  calcd for  $\text{C}_{17}\text{H}_{22}\text{NOS}^+$  ( $\text{M}+\text{H}$ ) $^+$  288.1417, found 288.1440.

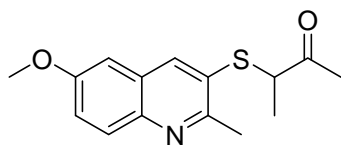

**3-((6-Methoxy-2-methylquinolin-3-yl)thio)butan-2-one (3ar)** : 48.2 mg, 35%, yellow oil.

$^1\text{H}$  NMR (400 MHz, Chloroform-*d*)  $\delta$  7.90 – 7.84 (m, 2H), 7.32 – 7.28 (m, 1H), 6.98 (d,  $J = 2.8$  Hz, 1H), 3.91 (s, 3H), 3.94 – 3.89 (m, 1H) 2.76 (s, 3H), 2.30 (s, 3H), 1.54 (d,  $J = 7.1$  Hz, 3H).  $^{13}\text{C}$  NMR (100 MHz, Chloroform-*d*)  $\delta$  206.0, 157.6, 155.5, 142.2, 135.4, 129.7, 128.3, 128.1, 122.2, 104.3, 55.5, 51.0, 25.6, 23.7, 16.1. HRMS (ESI)  $m/z$  calcd for  $\text{C}_{15}\text{H}_{18}\text{NO}_2\text{S}^+$  ( $\text{M}+\text{H}$ ) $^+$  276.1053, found 276.1076.

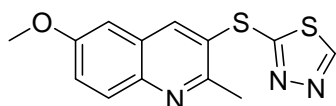

**2-((6-Methoxy-2-methylquinolin-3-yl)thio)-1,3,4-thiadiazole (3as)** : 46.2 mg, 32%. yellow solid. Mp: 123 - 125  $^\circ\text{C}$ .

$^1\text{H}$  NMR (400 MHz, Chloroform-*d*)  $\delta$  9.03 (s, 1H), 8.40 (s, 1H), 7.95 (d,  $J = 9.2$  Hz, 1H), 7.46 – 7.40 (m, 1H), 7.04 (d,  $J = 2.8$  Hz, 1H), 3.93 (s, 3H), 2.82 (s, 3H).  $^{13}\text{C}$  NMR (100 MHz, Chloroform-*d*)  $\delta$  166.9, 157.9, 157.2, 152.4, 144.2, 142.4, 130.0, 128.1, 124.2, 124.2, 104.7, 55.6, 23.7. HRMS (ESI)  $m/z$  calcd for  $\text{C}_{13}\text{H}_{12}\text{N}_3\text{OS}_2^+$  ( $\text{M}+\text{H}$ ) $^+$  290.0416, found 290.0440.

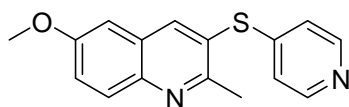

**6-Methoxy-2-methyl-3-(pyridin-4-ylthio)quinoline (3at)** : 25.4 mg, 18%, yellow oil.

$^1\text{H}$  NMR (400 MHz, Chloroform-*d*)  $\delta$  8.41 – 8.35 (m, 2H), 8.28 (s, 1H), 7.97 (d,  $J = 9.2$  Hz, 1H), 7.46 – 7.41 (m, 1H), 7.04 (d,  $J = 2.8$  Hz, 1H), 6.95 – 6.89 (m, 2H), 3.94 (s, 3H), 2.72 (s, 3H).  $^{13}\text{C}$  NMR (100 MHz, Chloroform-*d*)  $\delta$  158.4, 157.9, 149.6, 148.7, 144.1, 143.2, 130.1, 128.2, 123.8, 123.3, 120.8, 104.7, 55.6, 23.7. HRMS (ESI)  $m/z$  calcd for  $\text{C}_{16}\text{H}_{15}\text{N}_2\text{OS}^+$  ( $\text{M}+\text{H}$ ) $^+$  283.0900, found 283.0916.

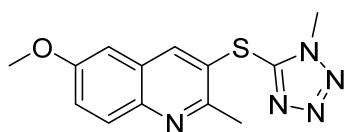

**6-Methoxy-2-methyl-3-((1-methyl-1H-tetrazol-5-yl)thio)quinoline (3au)** : 57.4 mg, 40%, yellow solid. Mp: 123 - 125  $^\circ\text{C}$ .



$^1\text{H}$  NMR (400 MHz, Chloroform-*d*)  $\delta$  8.17 (s, 1H), 7.91 (d,  $J = 9.2$  Hz, 1H), 7.41 – 7.36 (m, 1H), 6.98 (d,  $J = 2.8$  Hz, 1H), 4.06 (s, 3H), 3.90 (s, 3H), 2.79 (s, 3H).  $^{13}\text{C}$  NMR (100 MHz, Chloroform-*d*)  $\delta$  157.9, 155.7, 151.7, 143.7, 140.0, 129.9, 128.1, 123.8, 121.6, 104.6, 55.6, 34.0, 23.7. HRMS (ESI)  $m/z$  calcd for  $\text{C}_{13}\text{H}_{14}\text{N}_5\text{OS}^+$  ( $\text{M}+\text{H}$ ) $^+$  288.0914, found 288.0933.

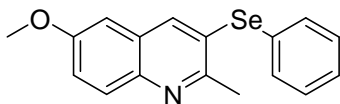

**6-Methoxy-2-methyl-3-(phenylselanyl)quinoline (3av)** : 101.2 mg, 62%, yellow solid. Mp: 79 - 81 °C.  $^1\text{H}$  NMR (400 MHz, Chloroform-*d*)  $\delta$  7.90 (d,  $J = 9.1$  Hz, 1H), 7.74 (s, 1H), 7.38 – 7.08 (m, 5H), 6.88 (d,  $J = 2.8$  Hz, 1H), 3.87 (s, 3H), 2.75 (s, 3H).  $^{13}\text{C}$  NMR (100 MHz, Chloroform-*d*)  $\delta$  157.4, 155.9, 142.7, 137.7, 133.9, 129.7, 129.7, 129.0, 128.5, 128.1, 127.4, 121.9, 104.2, 55.4, 25.0. HRMS (ESI)  $m/z$  calcd for  $\text{C}_{17}\text{H}_{16}\text{NOSe}^+$  ( $\text{M}+\text{H}$ ) $^+$  330.0392, found 330.0407.

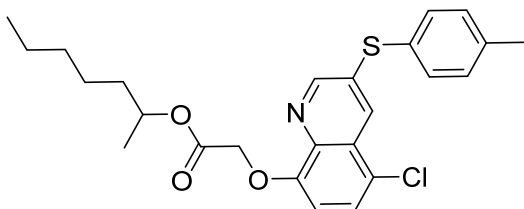

**Heptan-2-yl 2-((5-chloro-3-(*p*-tolylthio)quinolin-8-yl)oxy)acetate (4a)** : 50.2 mg, 22%, yellow oil.  $^1\text{H}$  NMR (400 MHz, Chloroform-*d*)  $\delta$  8.76 (d,  $J = 2.2$  Hz, 1H), 8.27 (d,  $J = 2.2$  Hz, 1H), 7.45 (d,  $J = 8.4$  Hz, 1H), 7.40 – 7.36 (m, 2H), 7.21 (d,  $J = 7.9$  Hz, 2H), 6.82 (d,  $J = 8.4$  Hz, 1H), 5.04 – 4.99 (m, 1H), 4.90 (s, 2H), 2.38 (s, 3H), 1.58 – 1.42 (m, 2H), 1.21 (p,  $J = 5.1, 4.5$  Hz, 9H), 0.84 (t,  $J = 6.6$  Hz, 3H).  $^{13}\text{C}$  NMR (100 MHz, Chloroform-*d*)  $\delta$  168.1, 153.0, 150.2, 138.9, 138.4, 134.3, 133.0, 131.3, 130.5, 128.5, 127.2, 126.8, 122.6, 109.2, 72.7, 66.4, 35.7, 31.5, 24.9, 22.5, 21.2, 19.8, 13.9. HRMS (ESI)  $m/z$  calcd for  $\text{C}_{25}\text{H}_{29}\text{ClNO}_3\text{S}^+$  ( $\text{M}+\text{H}$ ) $^+$  458.1551, found 458.1566.

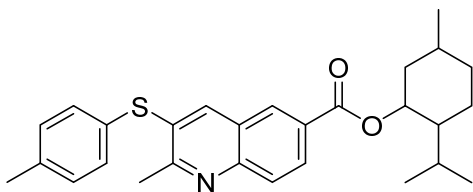

**2-Isopropyl-5-methylcyclohexyl 2-methyl-3-(*p*-tolylthio)quinoline-6-carboxylate (4b)** : 91.6 mg, 41%, yellow oil.  $^1\text{H}$  NMR (400 MHz, Chloroform-*d*)  $\delta$  8.30 (d,  $J = 1.8$  Hz, 1H), 8.24 – 8.16 (m, 1H), 8.00 (d,  $J = 8.8$  Hz, 1H), 7.65 (s, 1H), 7.37 (d,  $J = 7.8$  Hz, 2H), 7.25 (d,  $J = 8.1$  Hz, 2H), 5.04 – 4.93 (m, 1H), 2.80 (s, 3H), 2.42 (s, 3H), 2.12 (dt,  $J =$

12.3, 4.0 Hz, 1H), 1.96 (pd,  $J = 6.8, 2.5$  Hz, 1H), 1.77 – 1.70 (m, 2H), 1.61 – 1.53 (m, 2H), 1.18 – 1.07 (m, 2H), 0.95 – 0.90 (m, 7H), 0.79 (d,  $J = 6.9$  Hz, 3H).  $^{13}\text{C}$  NMR (100 MHz, Chloroform-*d*)  $\delta$  165.6, 159.4, 147.4, 139.1, 134.7, 133.6, 133.6, 130.7, 129.5, 128.4, 128.4, 128.3, 127.8, 126.5, 75.1, 47.2, 40.9, 34.2, 31.4, 26.4, 24.0, 23.5, 22.0, 21.24, 20.8, 16.4. HRMS (ESI)  $m/z$  calcd for  $\text{C}_{28}\text{H}_{34}\text{NO}_2\text{S}^+(\text{M}+\text{H})^+$  448.2305, found 448.2319.

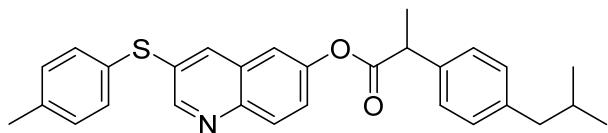

**3-(*p*-Tolylthio)quinolin-6-yl 2-(4-isobutylphenyl)propanoate (4c)** : 84.2 mg, 37%, yellow oil.

$^1\text{H}$  NMR (400 MHz, Chloroform-*d*)  $\delta$  8.71 (d,  $J = 2.2$  Hz, 1H), 8.01 (d,  $J = 9.0$  Hz, 1H), 7.76 (d,  $J = 2.3$  Hz, 1H), 7.39 – 7.26 (m, 6H), 7.21 – 7.14 (m, 4H), 4.03 – 3.92 (m, 1H), 2.48 (d,  $J = 7.2$  Hz, 2H), 2.37 (s, 3H), 1.91 – 1.83 (m, 1H), 1.62 (d,  $J = 7.1$  Hz, 3H), 0.91 (d,  $J = 6.6$  Hz, 6H).  $^{13}\text{C}$  NMR (100 MHz, Chloroform-*d*)  $\delta$  173.1, 150.6, 149.1, 144.1, 141.0, 138.8, 136.9, 134.1, 133.0, 132.8, 130.6, 130.5, 129.6, 128.8, 128.5, 127.2, 124.1, 117.5, 45.2, 45.0, 30.2, 22.4, 21.2, 18.5. HRMS (ESI)  $m/z$  calcd for  $\text{C}_{29}\text{H}_{30}\text{NO}_2\text{S}^+(\text{M}+\text{H})^+$  456.1992, found 456.2016.

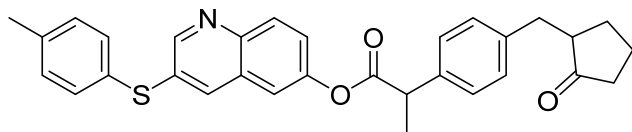

**3-(*p*-Tolylthio)quinolin-6-yl 2-(4-((2-oxocyclopentyl)methyl)phenyl)propanoate (4d)** : 52.0 mg, 21%, yellow oil.

$^1\text{H}$  NMR (400 MHz, Chloroform-*d*)  $\delta$  8.72 (d,  $J = 2.3$  Hz, 1H), 8.01 (d,  $J = 9.1$  Hz, 1H), 7.77 (d,  $J = 2.3$  Hz, 1H), 7.38 – 7.28 (m, 6H), 7.22 – 7.17 (m, 4H), 3.97 (d,  $J = 7.1$  Hz, 1H), 3.20 – 3.12 (m, 1H), 2.58 – 2.50 (m, 1H), 2.39 – 2.31 (m, 5H), 2.17 – 2.07 (m, 2H), 2.02 – 1.92 (m, 1H), 1.79 – 1.69 (m, 1H), 1.64 – 1.52 (m, 4H).  $^{13}\text{C}$  NMR (100 MHz, Chloroform-*d*)  $\delta$  173.0, 150.5, 149.1, 144.1, 139.3, 138.8, 137.5, 134.1, 133.1, 132.9, 130.6, 130.5, 129.4, 128.8, 128.5, 127.6, 124.1, 117.5, 50.9, 45.2, 38.1, 35.2, 29.2, 21.2, 20.5, 18.5. HRMS (ESI)  $m/z$  calcd for  $\text{C}_{31}\text{H}_{30}\text{NO}_3\text{S}^+(\text{M}+\text{H})^+$  496.1941, found 496.1961.

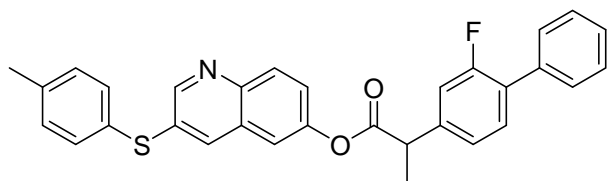

**3-(*p*-Tolylthio)quinolin-6-yl 2-(2-fluoro-[1,1'-biphenyl]-4-yl)propanoate (4e)** : 51.7 mg, 21%, white solid. Mp: 95 - 97 °C.

$^1\text{H}$  NMR (400 MHz, Chloroform-*d*)  $\delta$  8.72 (d,  $J = 2.3$  Hz, 1H), 8.04 (d,  $J = 9.0$  Hz, 1H), 7.77 (d,  $J = 2.3$  Hz, 1H), 7.56 (d,  $J = 7.6$  Hz, 2H), 7.48 – 7.43 (m, 3H), 7.41 – 7.27 (m, 6H), 7.20 (t,  $J = 8.0$  Hz, 3H), 4.04 (q,  $J = 7.1$  Hz, 1H), 2.37 (s, 3H), 1.68 (d,  $J = 7.1$  Hz, 3H).  $^{13}\text{C}$  NMR (100 MHz, Chloroform-*d*)  $\delta$  172.3, 159.8 (d,  $J = 247.2$  Hz), 150.5, 149.0, 144.1, 140.9 (d,  $J = 7.6$  Hz), 138.9, 135.3, 134.1, 133.1, 133.0, 131.1 (d,  $J = 3.9$  Hz), 130.7, 130.5, 128.9 (d,  $J = 2.9$  Hz), 128.7, 128.5, 128.5, 128.3, 127.8, 124.0, 123.6 (d,  $J = 3.4$  Hz), 117.5, 115.3 (d,  $J = 23.7$  Hz), 45.1, 21.2, 18.3. HRMS (ESI)  $m/z$  calcd for  $\text{C}_{31}\text{H}_{25}\text{FNO}_2\text{S}^+$  ( $\text{M}+\text{H}$ ) $^+$  494.1585, found 494.1599.

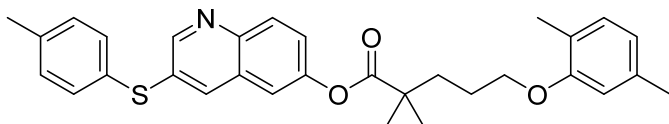

**3-(*p*-Tolylthio)quinolin-6-yl 5-(2,5-dimethylphenoxy)-2,2-dimethylpentanoate (4f)** : 47.4 mg, 19%, yellow oil.

$^1\text{H}$  NMR (400 MHz, Chloroform-*d*)  $\delta$  8.73 (d,  $J = 2.3$  Hz, 1H), 8.04 (d,  $J = 8.7$  Hz, 1H), 7.77 (d,  $J = 2.3$  Hz, 1H), 7.41 – 7.35 (m, 2H), 7.31 (d,  $J = 8.8$  Hz, 2H), 7.21 (d,  $J = 7.9$  Hz, 2H), 6.99 (d,  $J = 7.4$  Hz, 1H), 6.68 – 6.57 (m, 2H), 4.00 (t,  $J = 5.3$  Hz, 2H), 2.38 (s, 3H), 2.29 (s, 3H), 2.16 (s, 3H), 1.94 – 1.84 (m, 4H), 1.40 (s, 6H).  $^{13}\text{C}$  NMR (100 MHz, Chloroform-*d*)  $\delta$  176.3, 156.7, 150.4, 149.3, 144.0, 138.8, 136.5, 134.1, 133.1, 132.8, 130.6, 130.5, 130.3, 128.8, 128.6, 124.3, 123.5, 120.7, 117.6, 111.8, 67.5, 42.5, 37.1, 25.2, 25.1, 21.4, 21.2, 15.8. HRMS (ESI)  $m/z$  calcd for  $\text{C}_{31}\text{H}_{34}\text{NO}_3\text{S}^+$  ( $\text{M}+\text{H}$ ) $^+$  500.2254, found 500.2270.

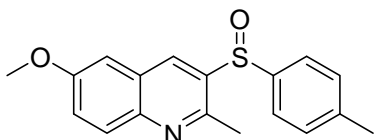

**6-Methoxy-2-methyl-3-(*p*-tolylsulfinyl)quinoline (4g)** : 40.3 mg, 65%, white solid. Mp: 73 - 75 °C.

$^1\text{H}$  NMR (400 MHz, Chloroform-*d*)  $\delta$  8.77 (s, 1H), 7.95 (d,  $J = 9.2$  Hz, 1H), 7.53 (d,  $J = 8.2$  Hz, 2H), 7.46 – 7.40 (m, 1H), 7.28 – 7.21 (m, 3H), 3.95 (s, 3H), 2.52 (s, 3H), 2.36 (s, 3H).  $^{13}\text{C}$  NMR (100 MHz, Chloroform-*d*)  $\delta$  157.9, 151.1, 144.2, 142.7, 140.0, 137.7, 132.0, 130.2, 129.6, 127.6, 126.8, 124.0, 105.5, 55.6, 22.3, 21.4. HRMS (ESI)  $m/z$  calcd for  $\text{C}_{18}\text{H}_{17}\text{NO}_2\text{SNa}^+$  ( $\text{M}+\text{Na}$ ) $^+$  334.0872, found 334.0892.

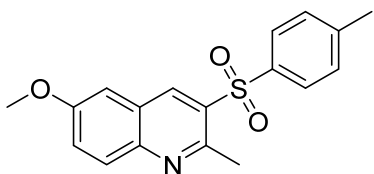

**6-Methoxy-2-methyl-3-tosylquinoline (4h)** : 46.4 mg, 71%, white solid. Mp: 164 - 166 °C.

$^1\text{H}$  NMR (400 MHz, Chloroform-*d*)  $\delta$  8.94 (s, 1H), 7.93 (d,  $J = 9.2$  Hz, 1H), 7.85 – 7.76 (m, 2H), 7.54 – 7.45 (m, 1H),

7.32 (d,  $J = 8.1$  Hz, 2H), 7.21 (d,  $J = 2.8$  Hz, 1H), 3.96 (s, 3H), 2.74 (s, 3H), 2.42 (s, 3H).  $^{13}\text{C}$  NMR (100 MHz, Chloroform- $d$ )  $\delta$  158.2, 152.5, 145.2, 144.6, 137.6, 137.2, 133.9, 129.9, 129.8, 128.0, 126.7, 125.5, 105.9, 55.7, 23.8, 21.6. HRMS (ESI)  $m/z$  calcd for  $\text{C}_{18}\text{H}_{17}\text{NO}_3\text{SNa}^+$  ( $\text{M}+\text{Na}$ ) $^+$  350.0821, found 350.0844.

[1] A. Nandy, I. Kazi, S. Guha, G. Sekar, *J. Org. Chem.*, **2021**, *86*, 2570–2581.

## 6. NMR Spectra for the compounds prepared

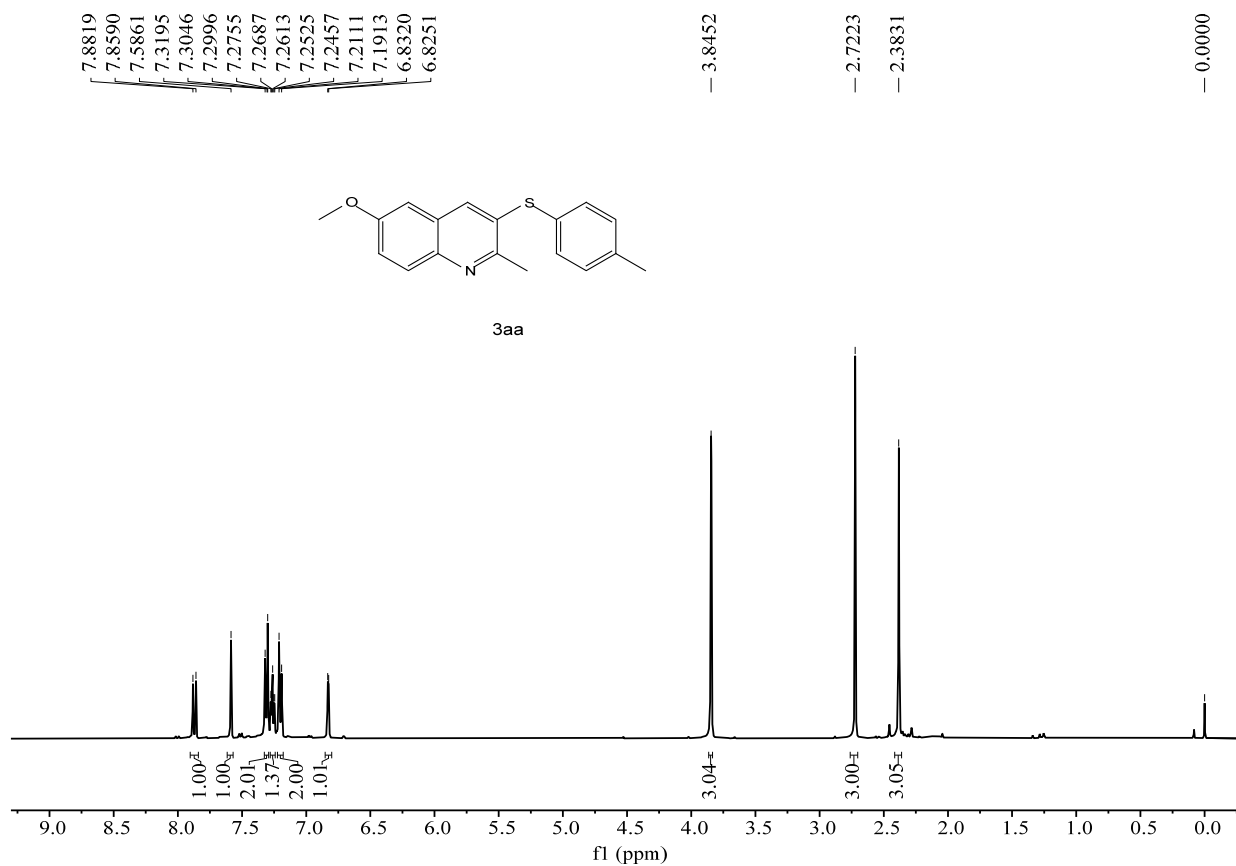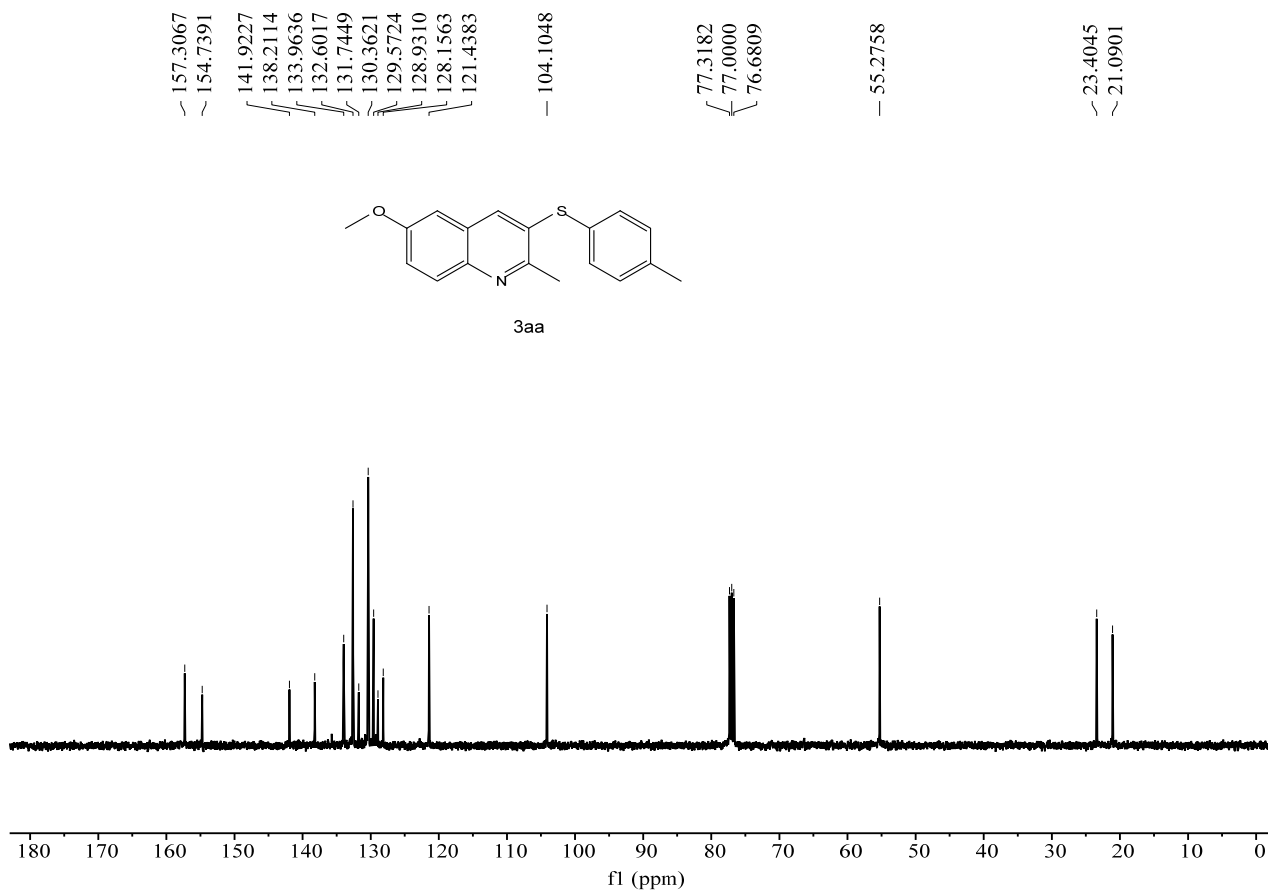

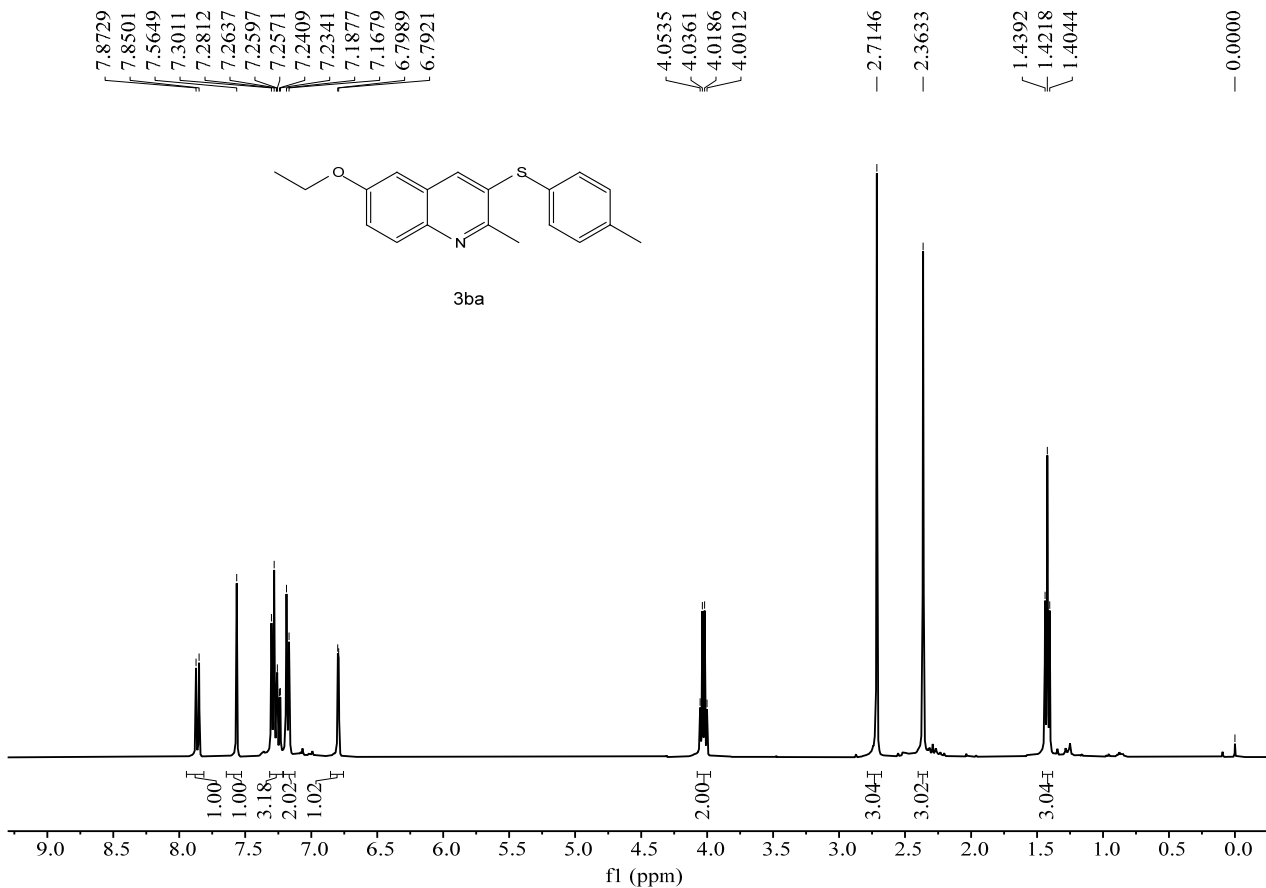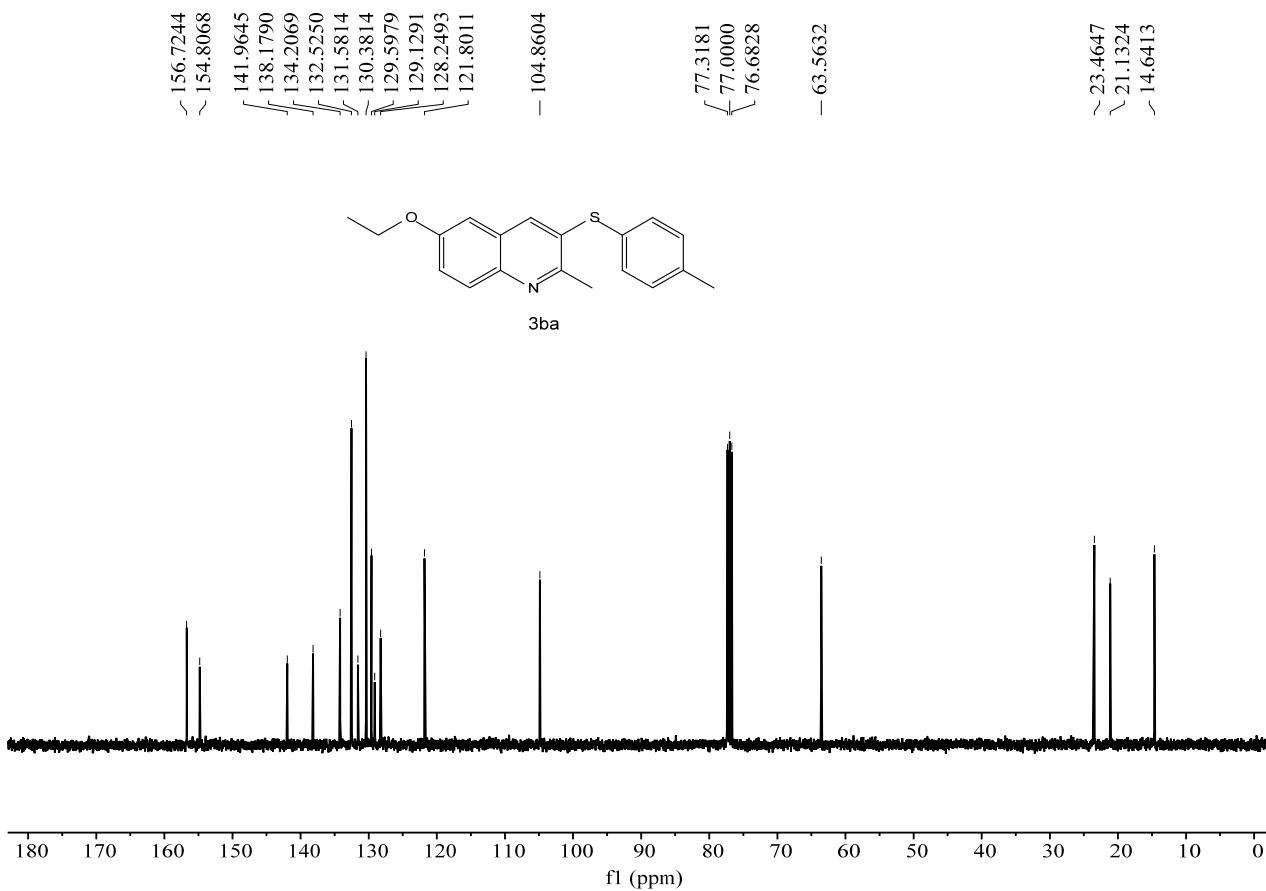

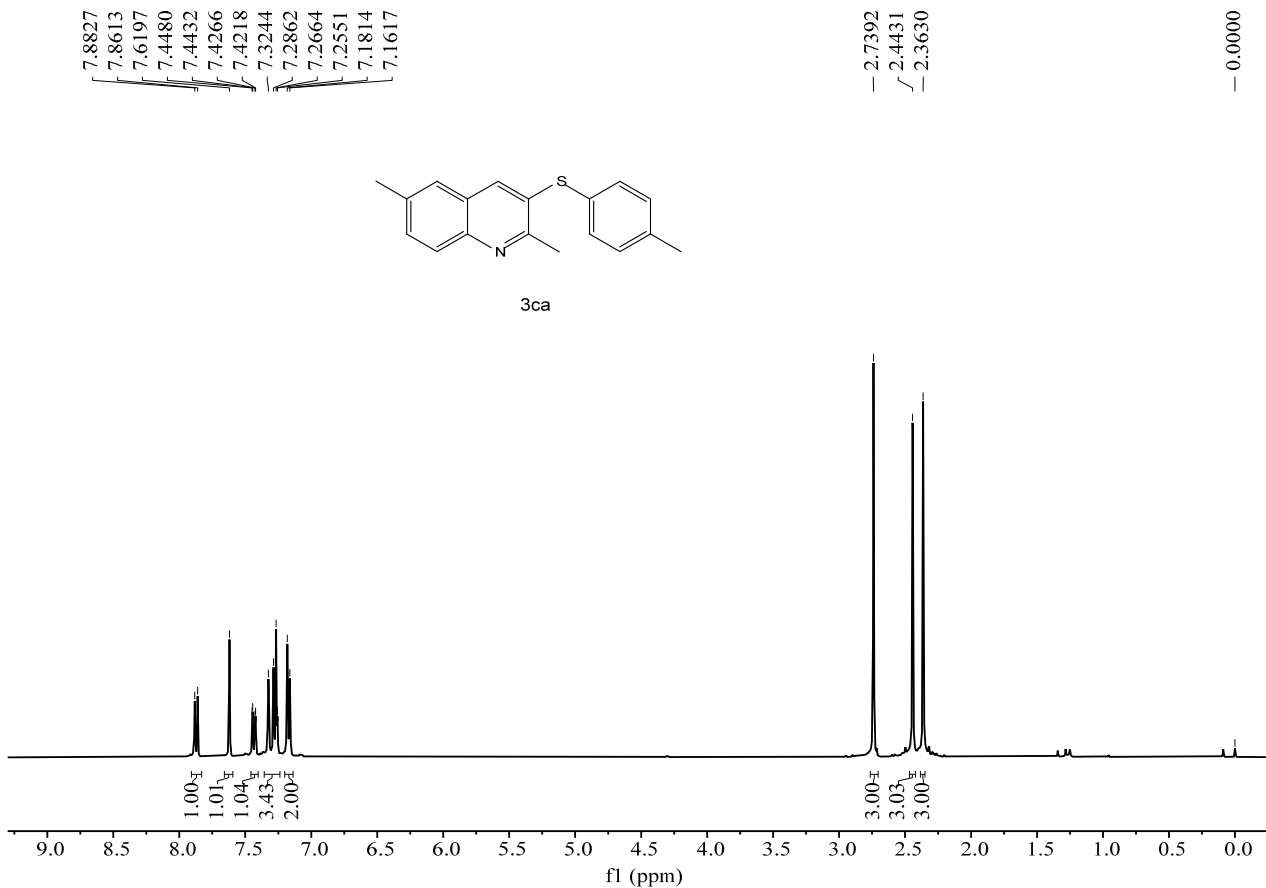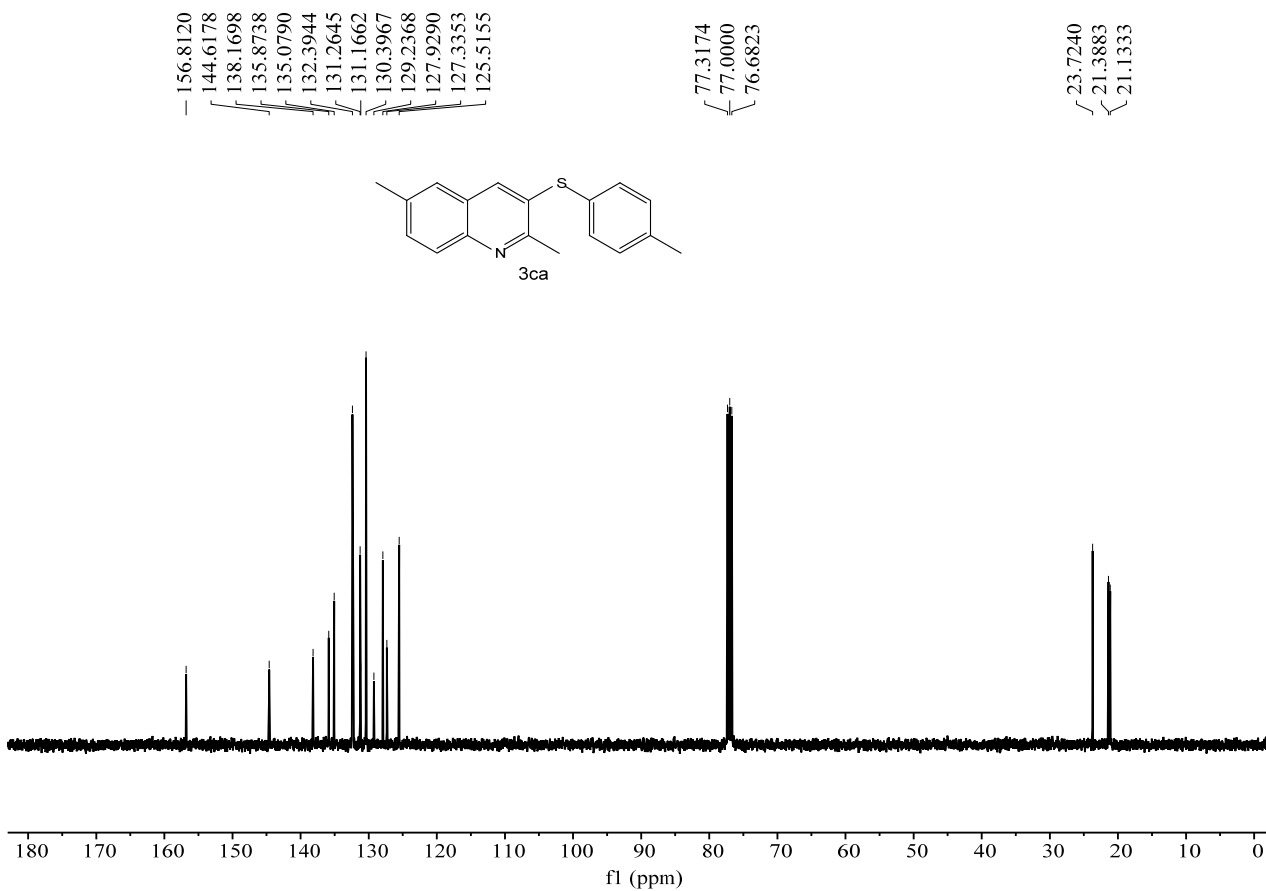

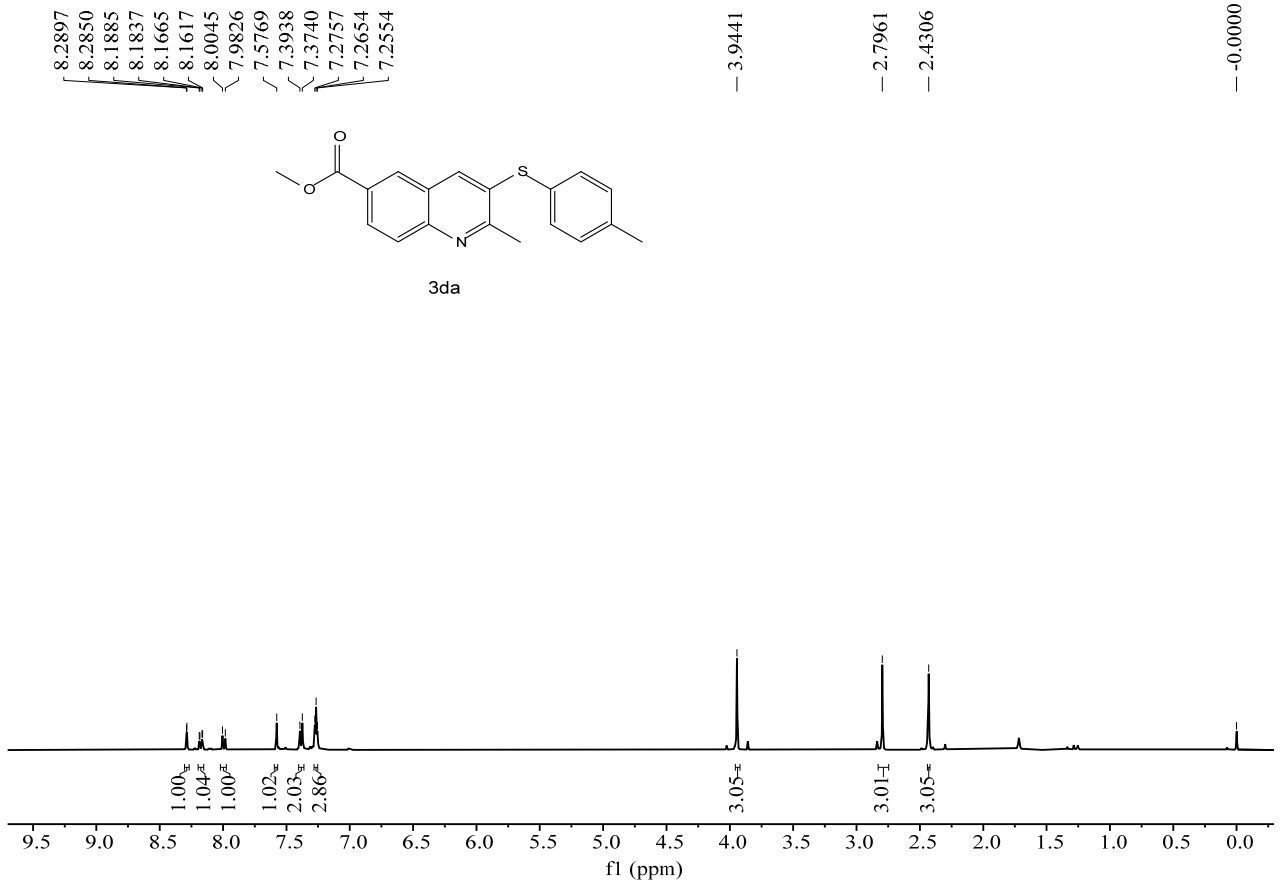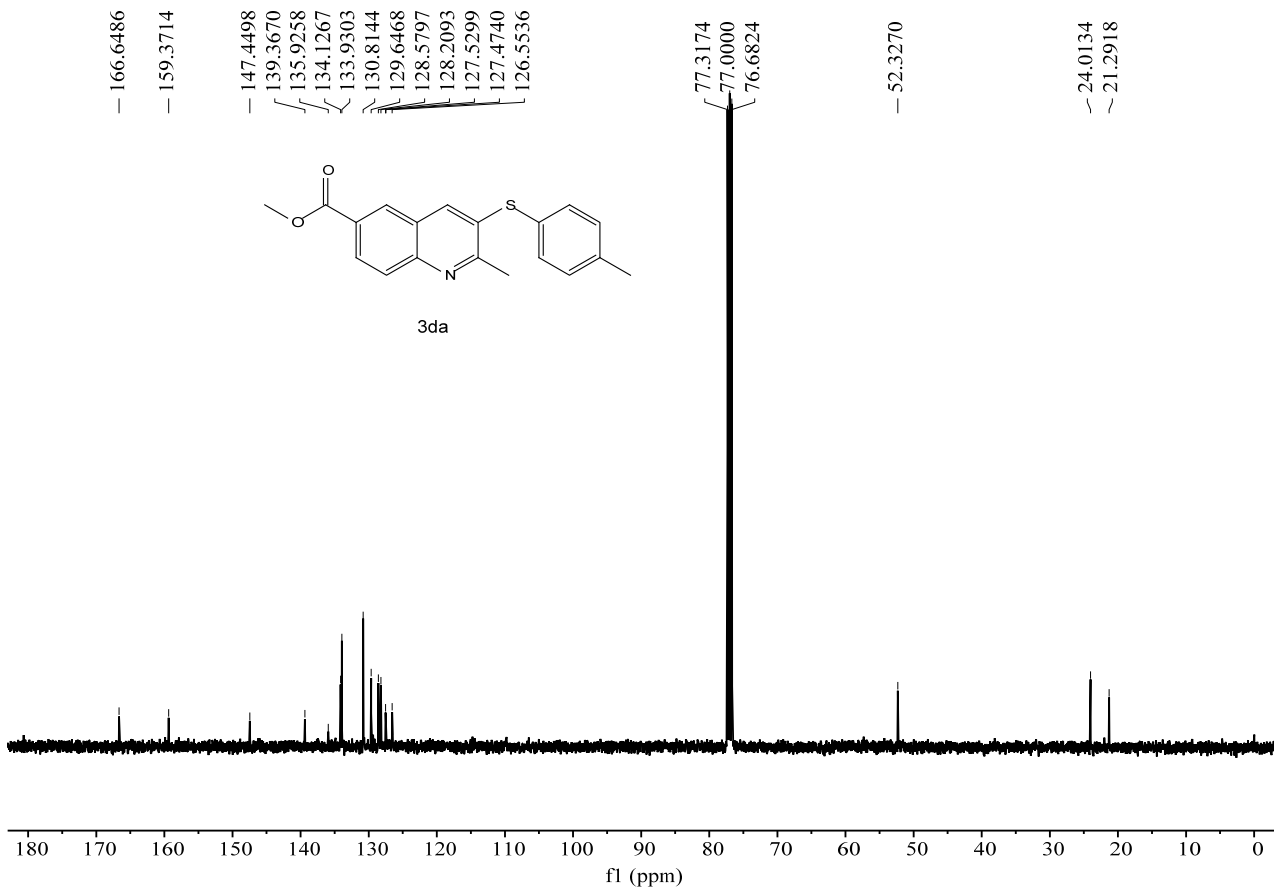



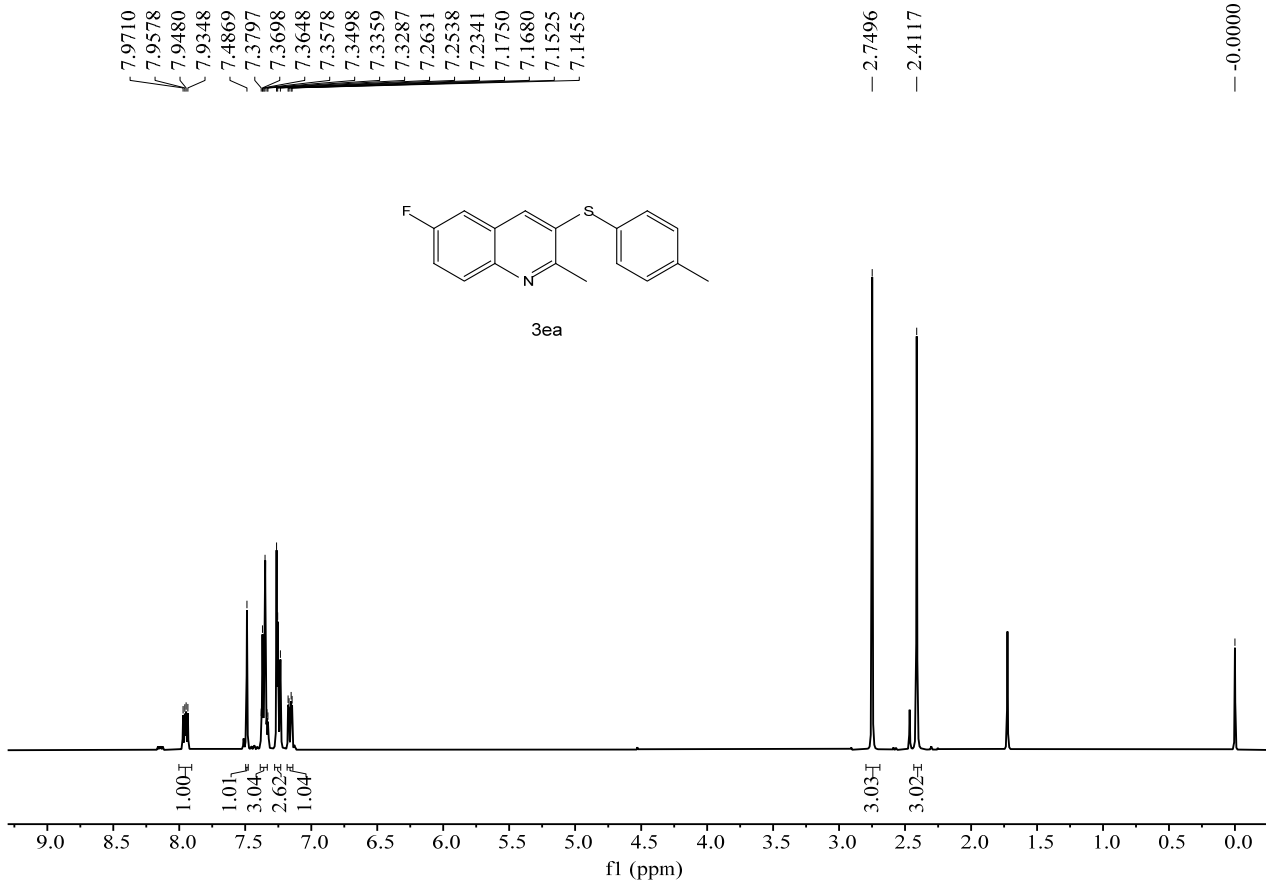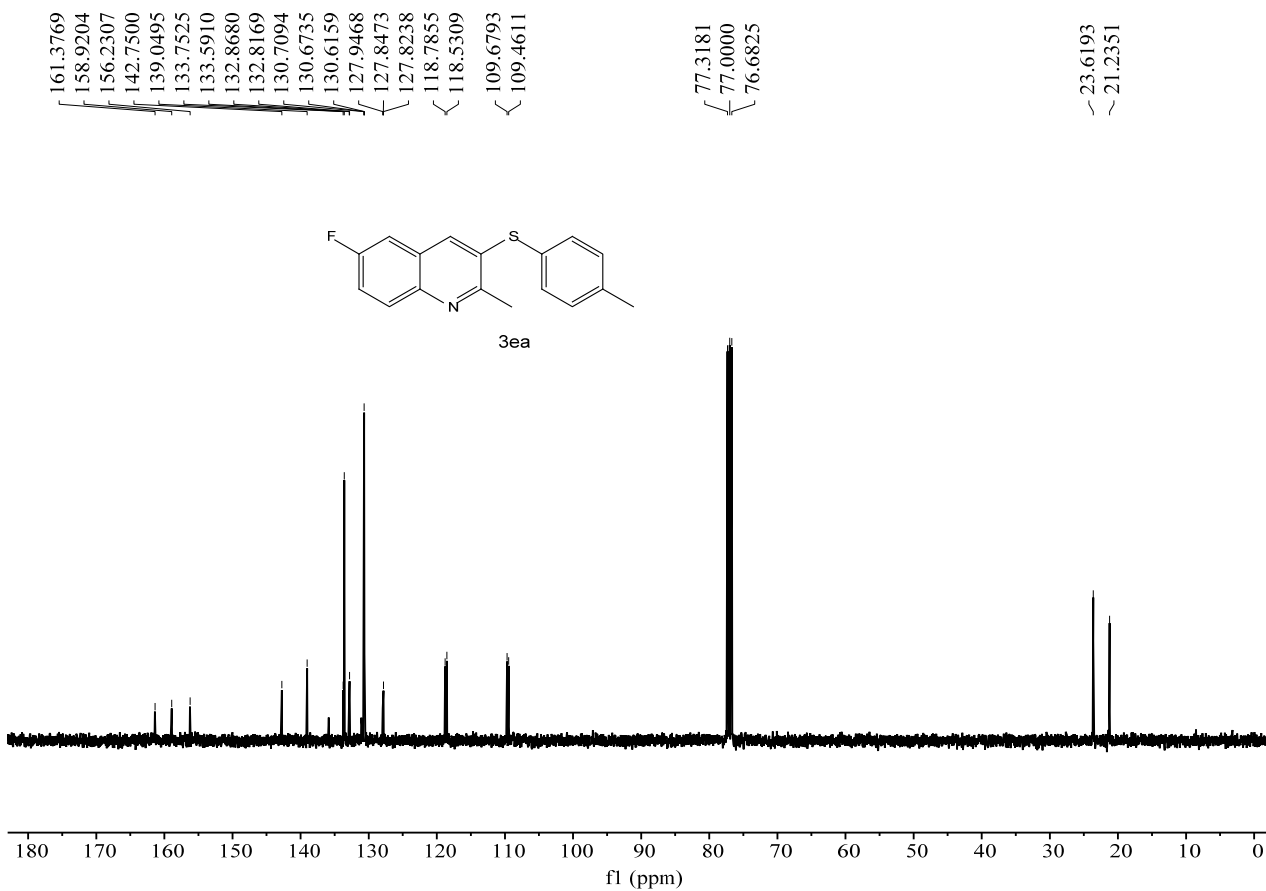

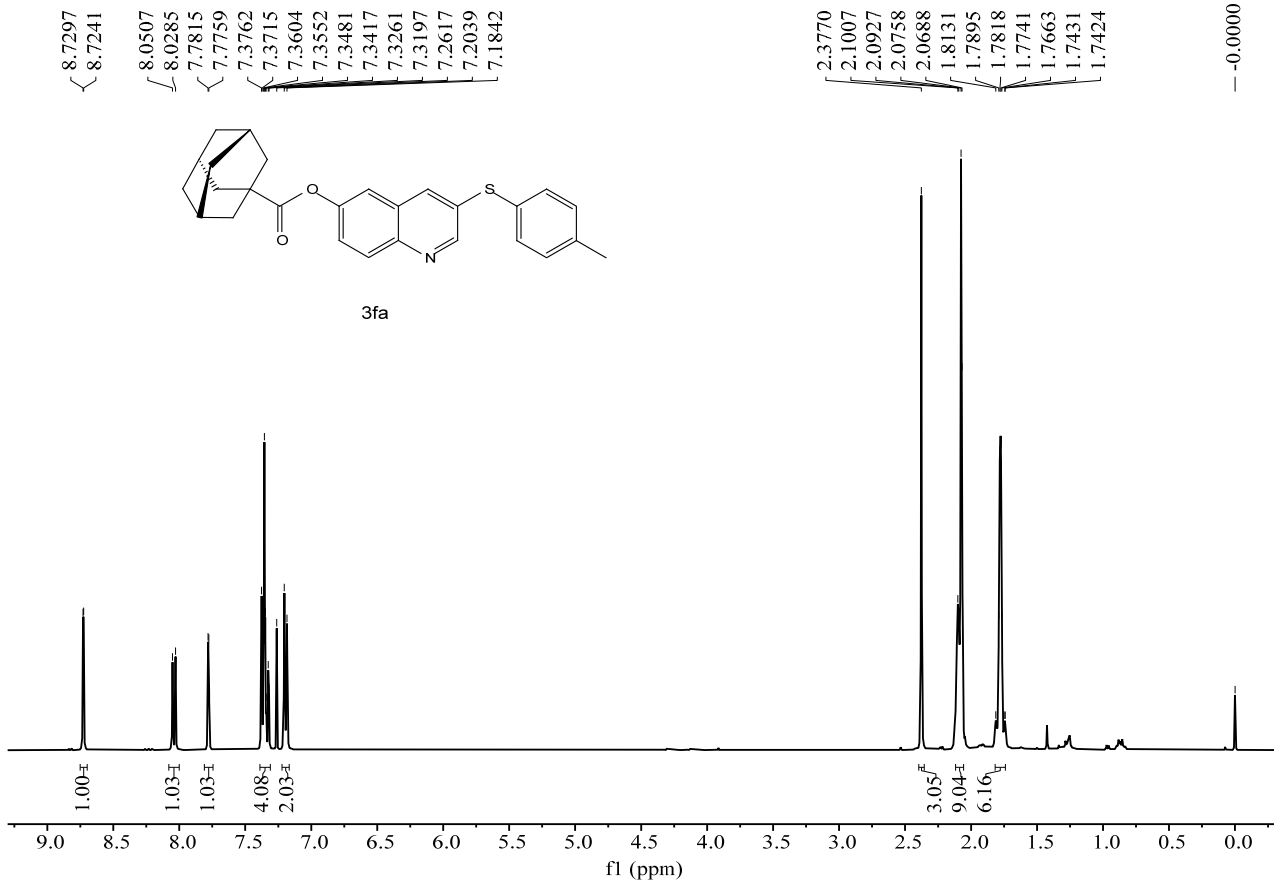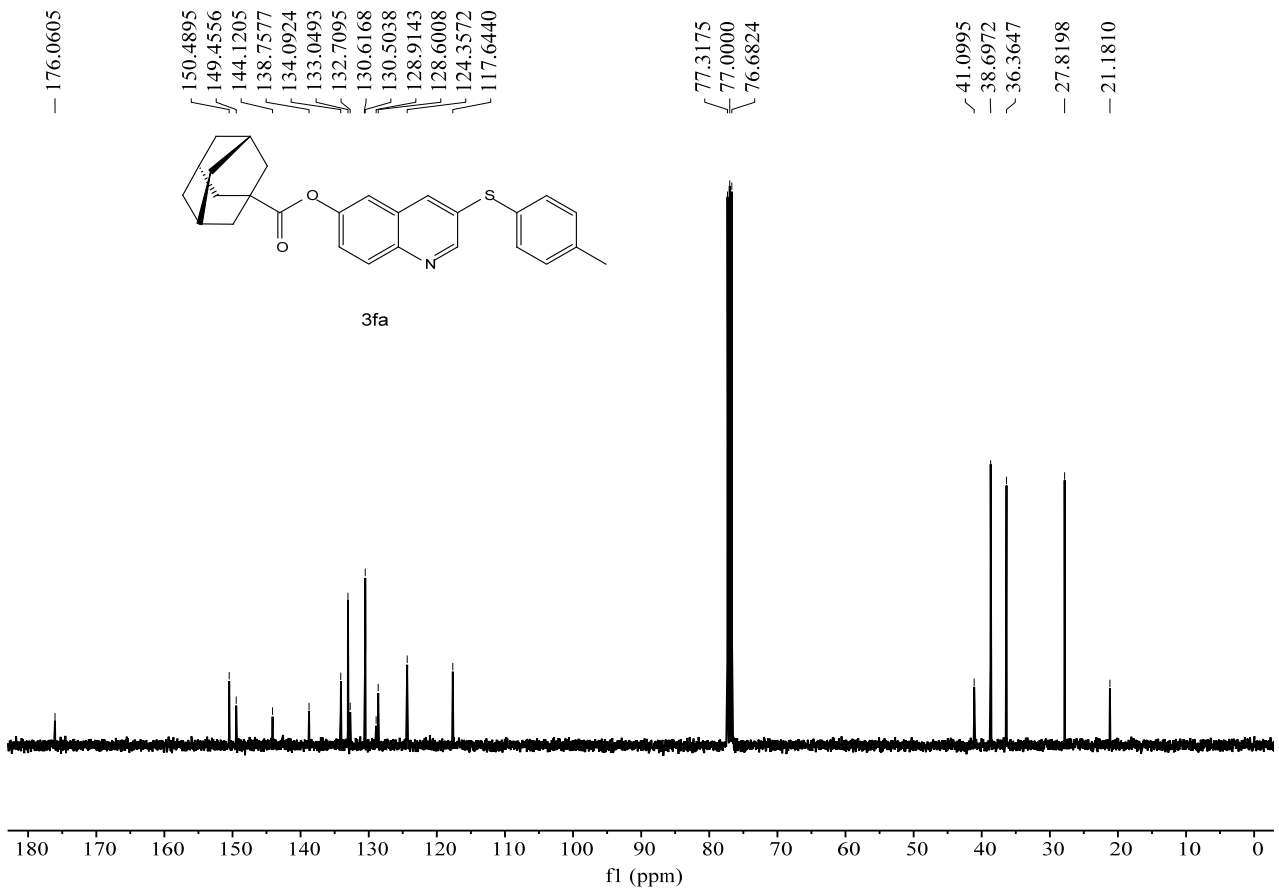

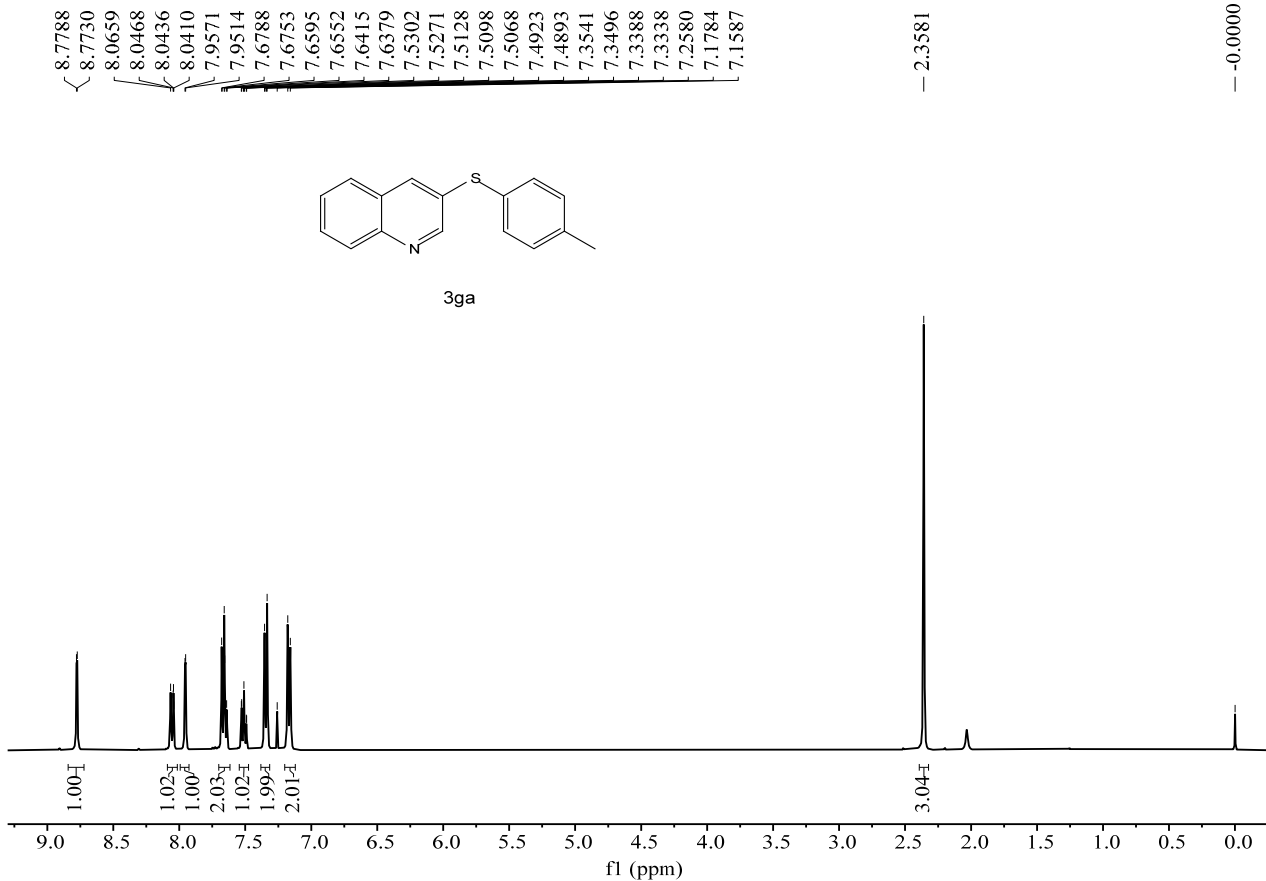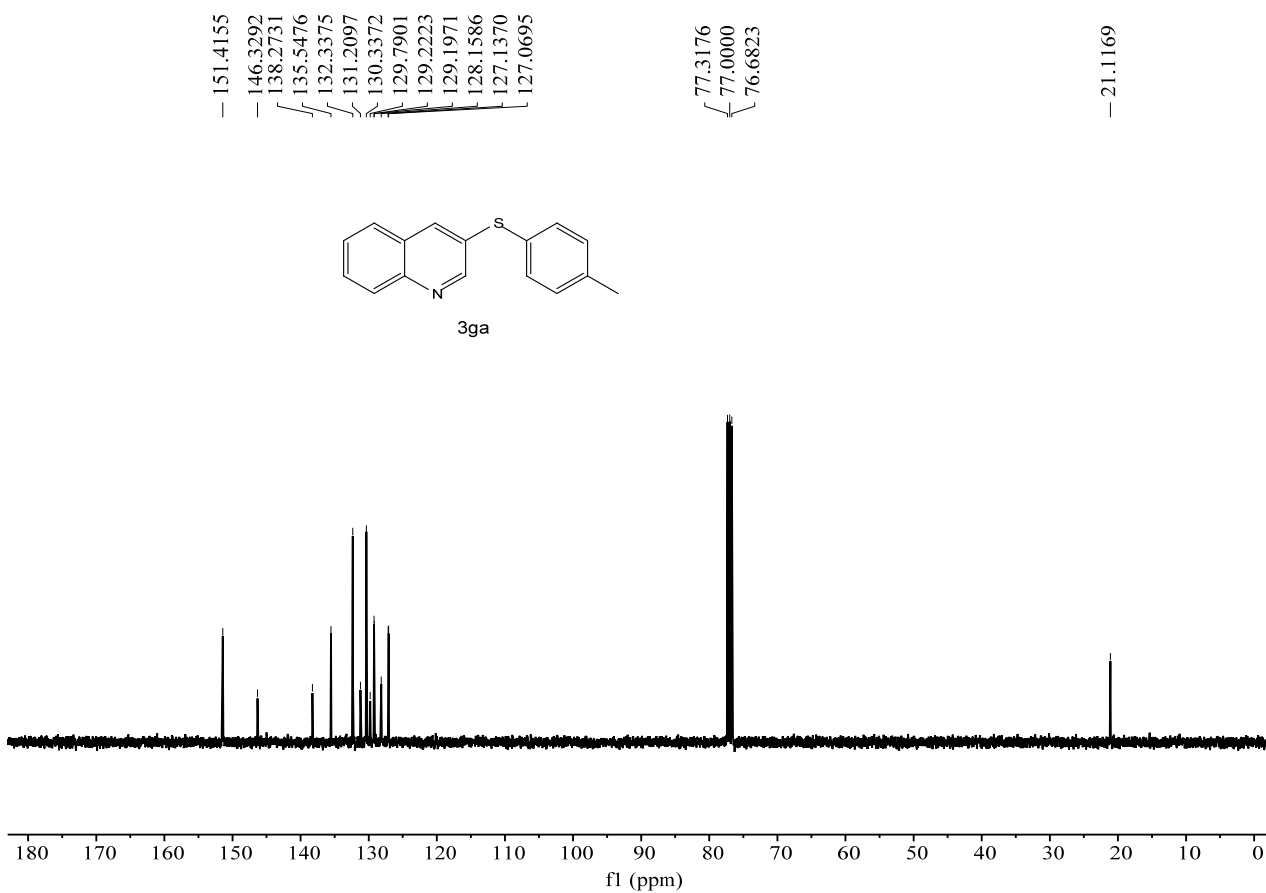

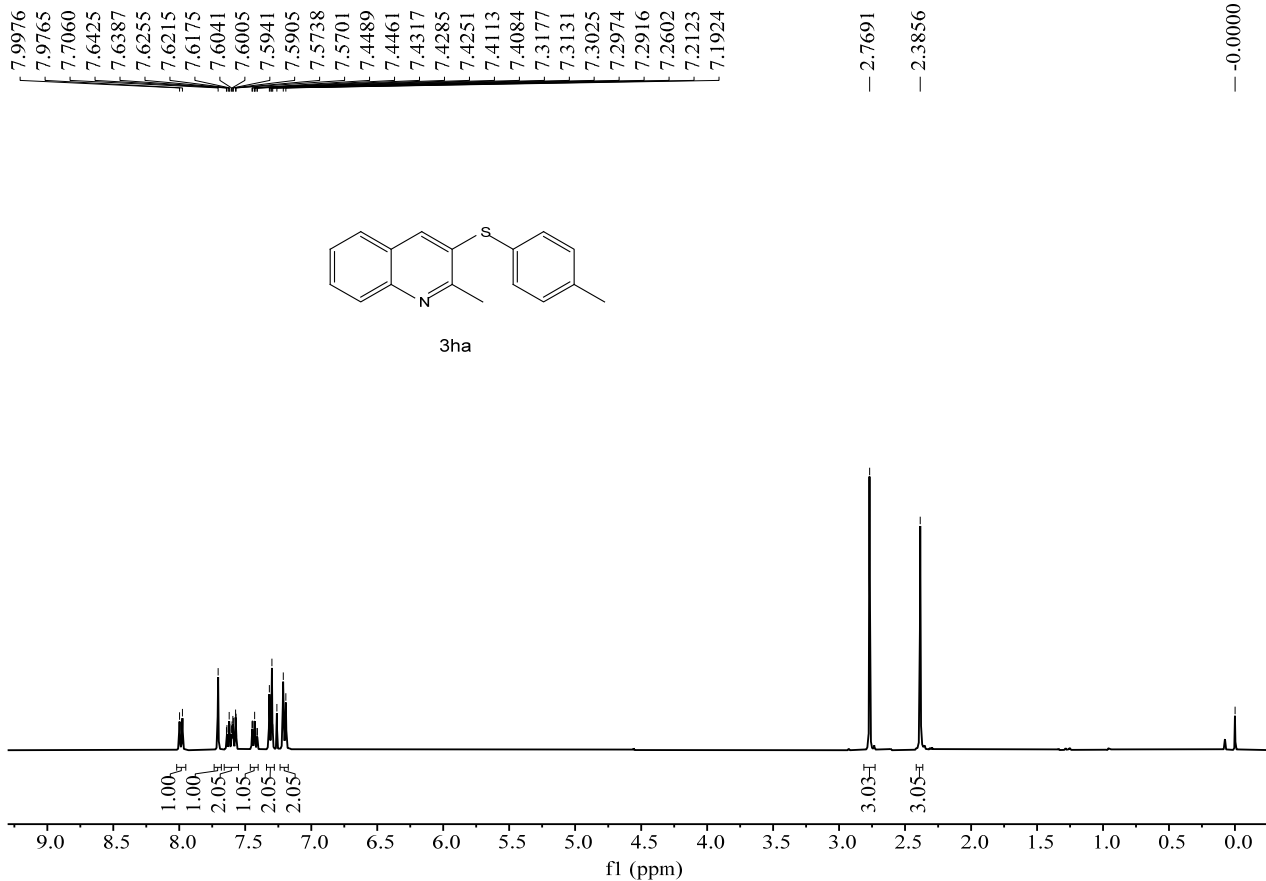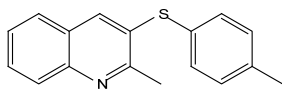

3ha

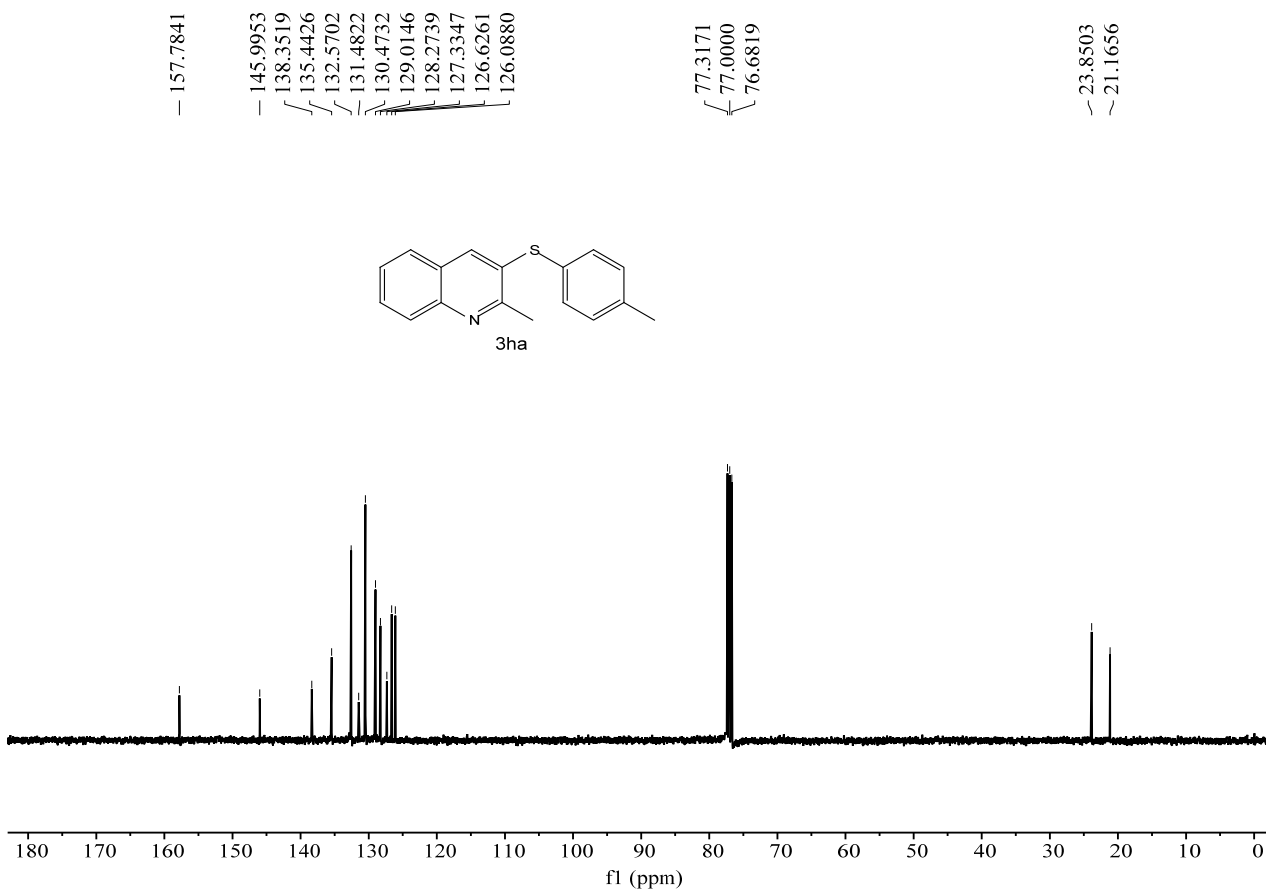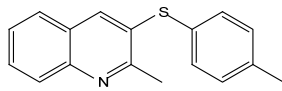

3ha

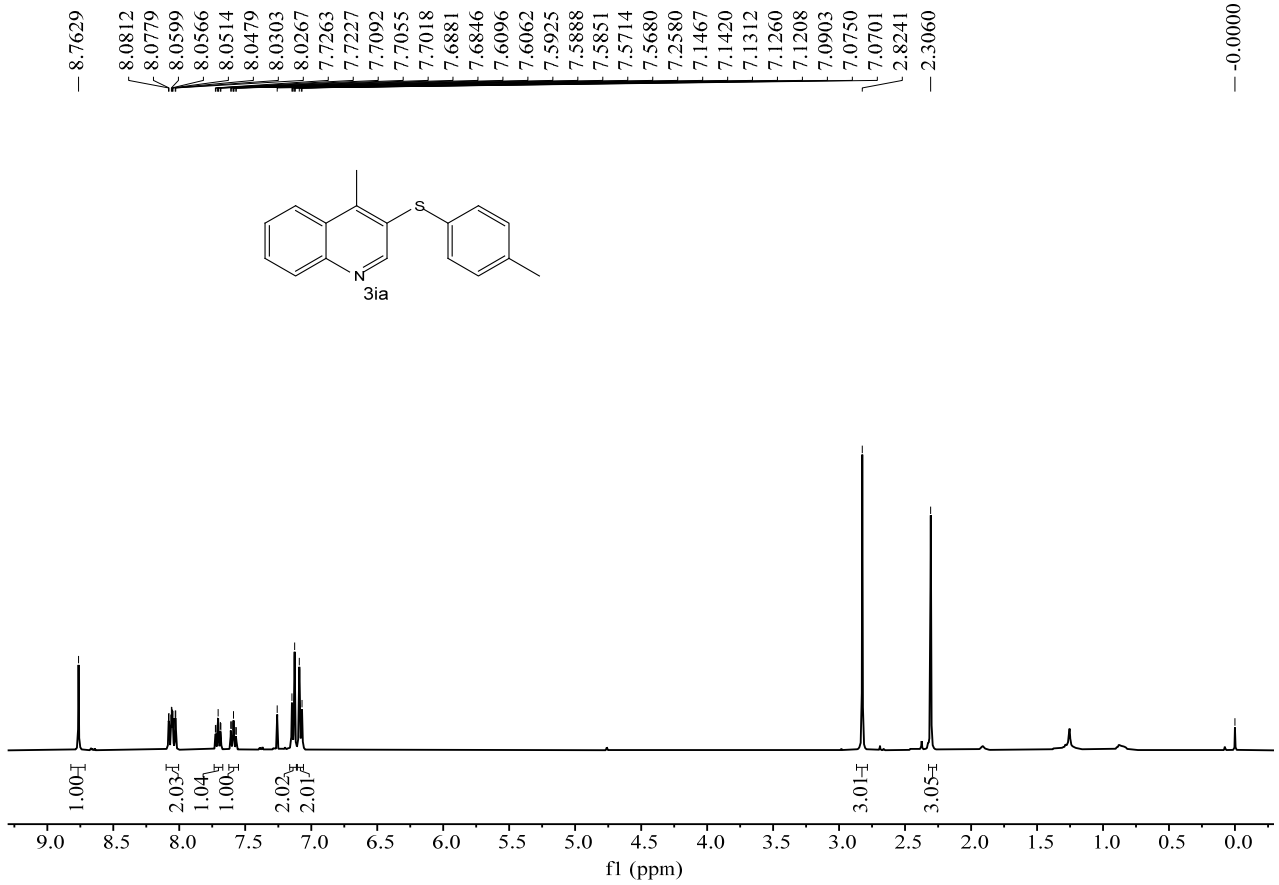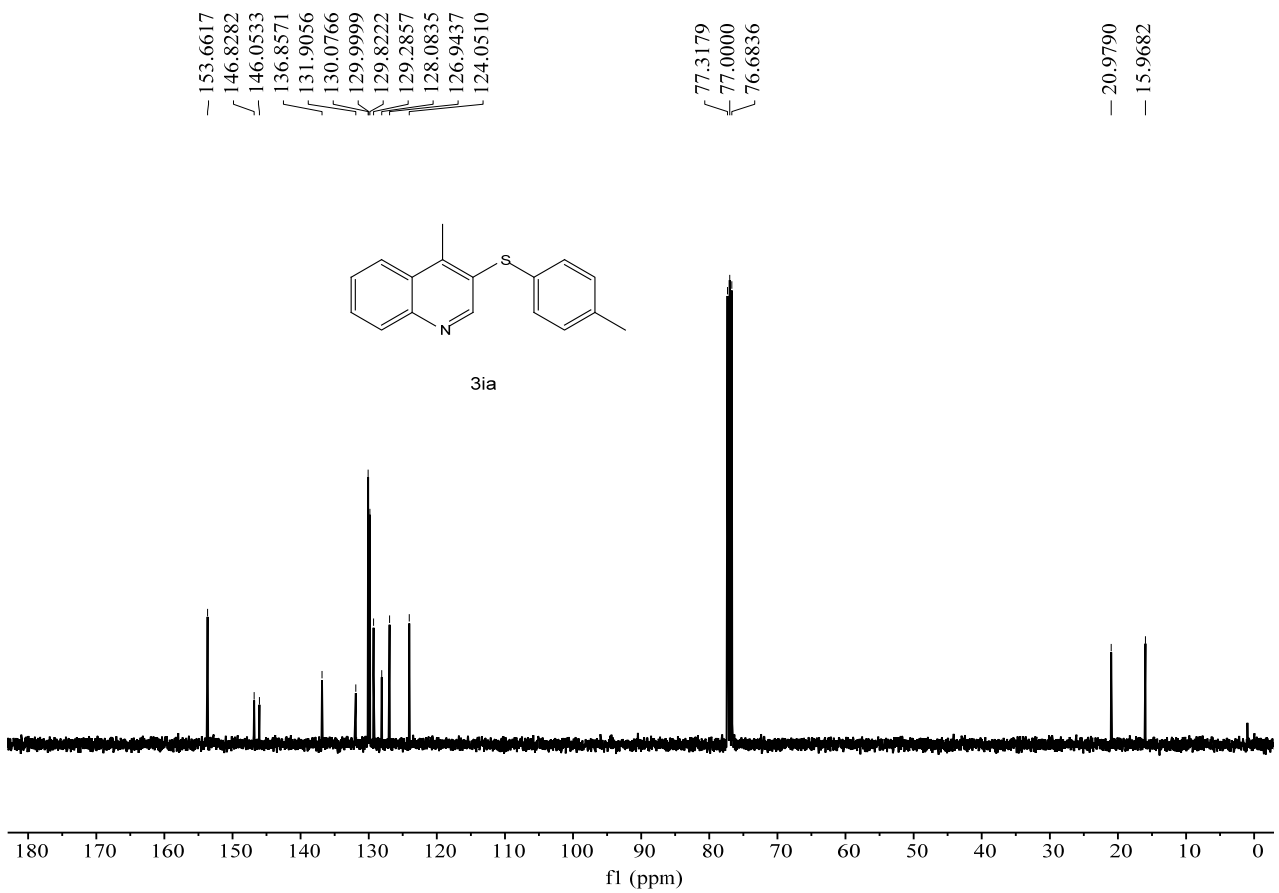

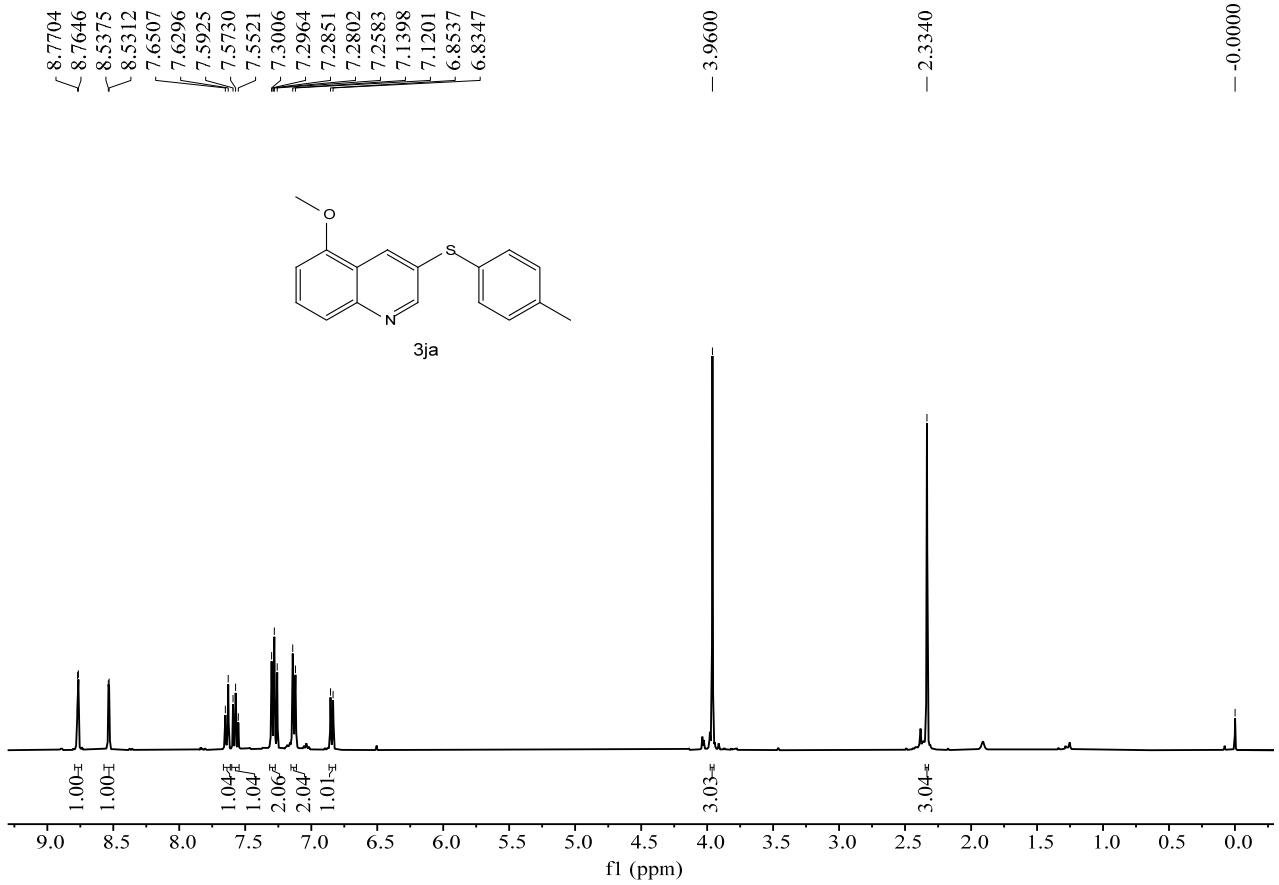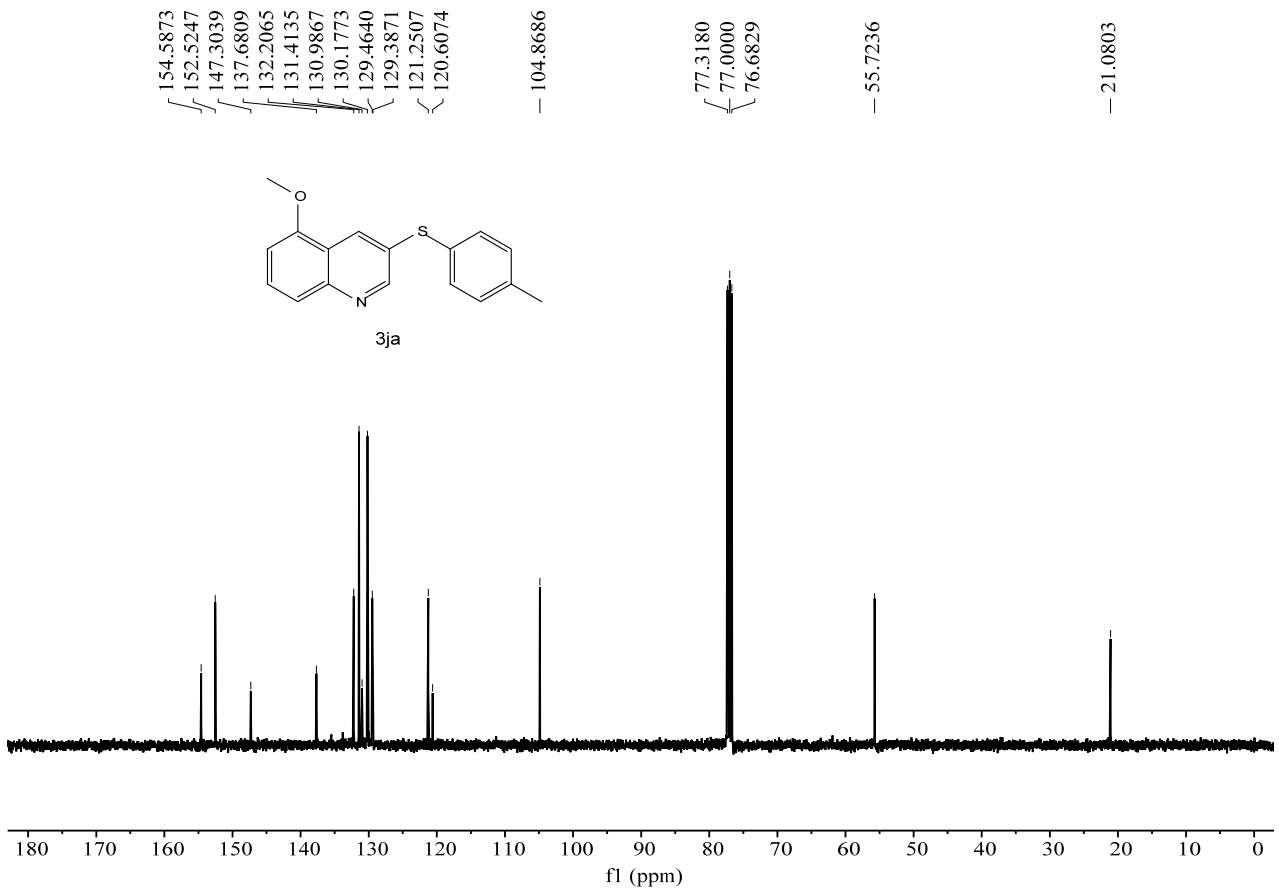

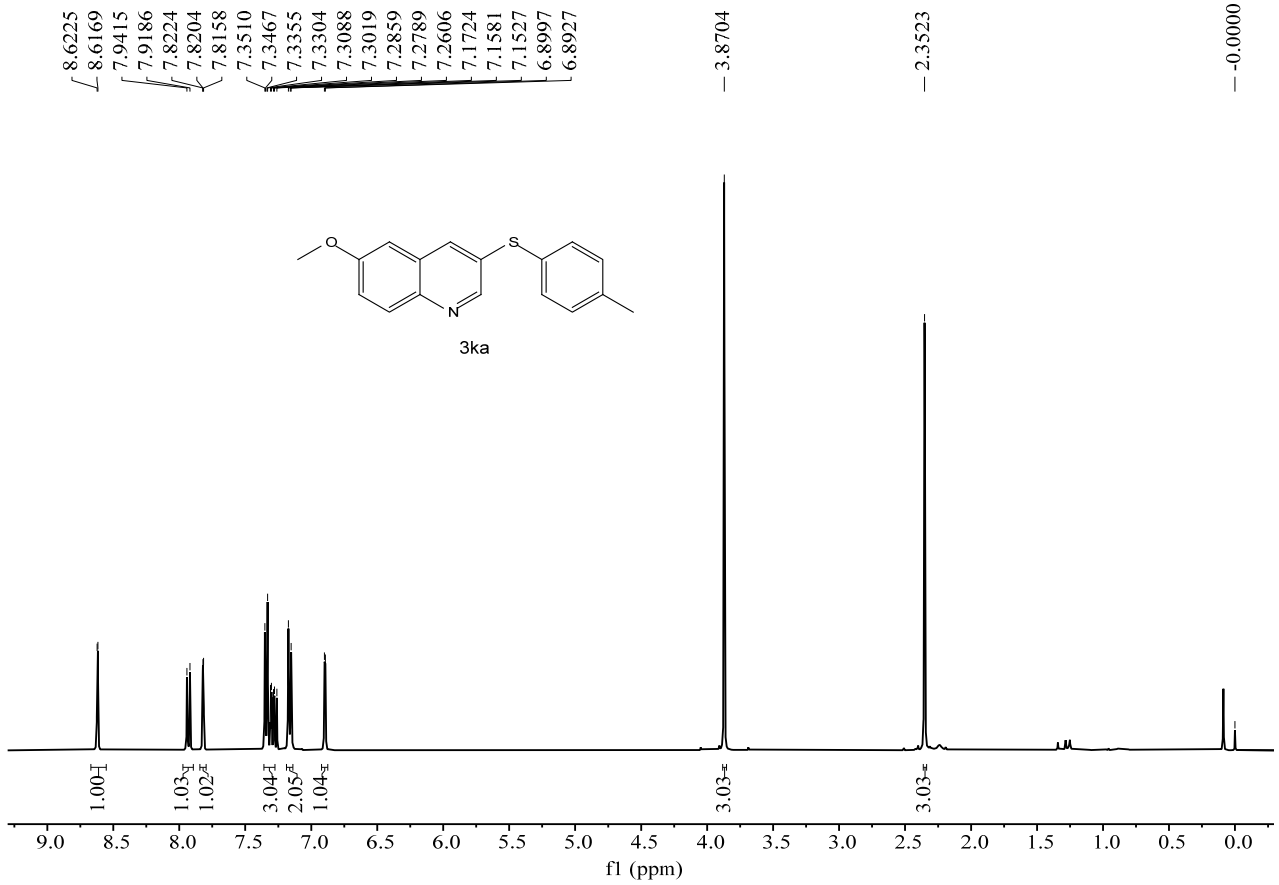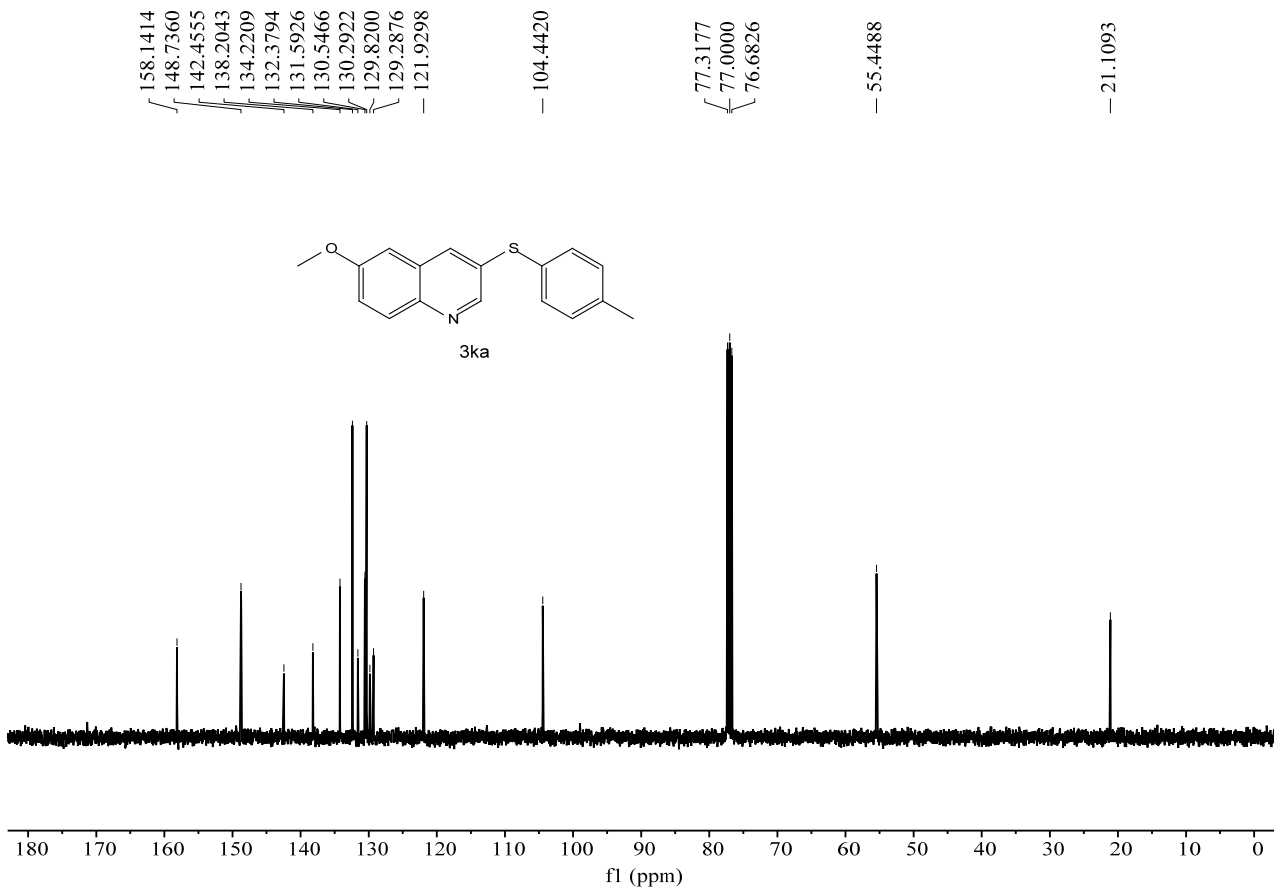

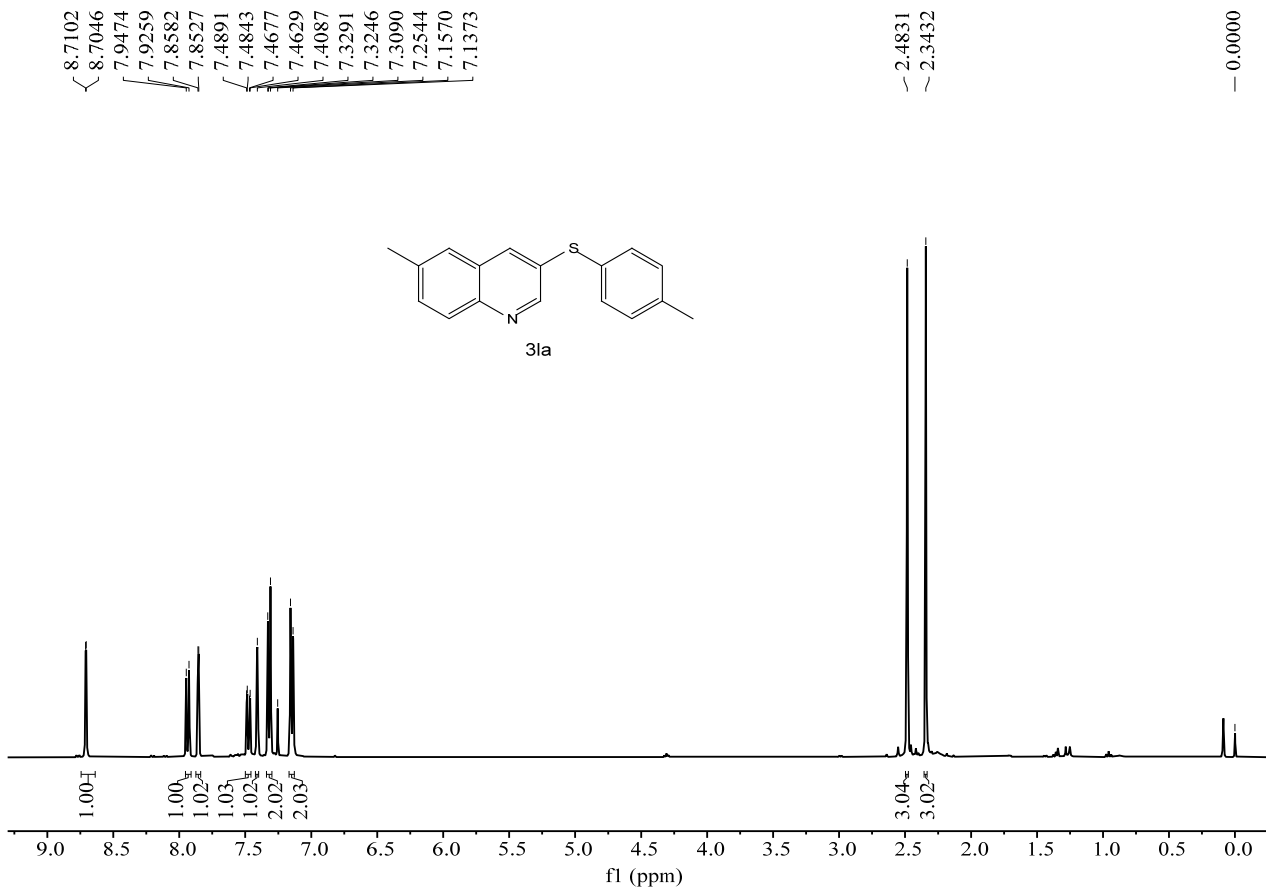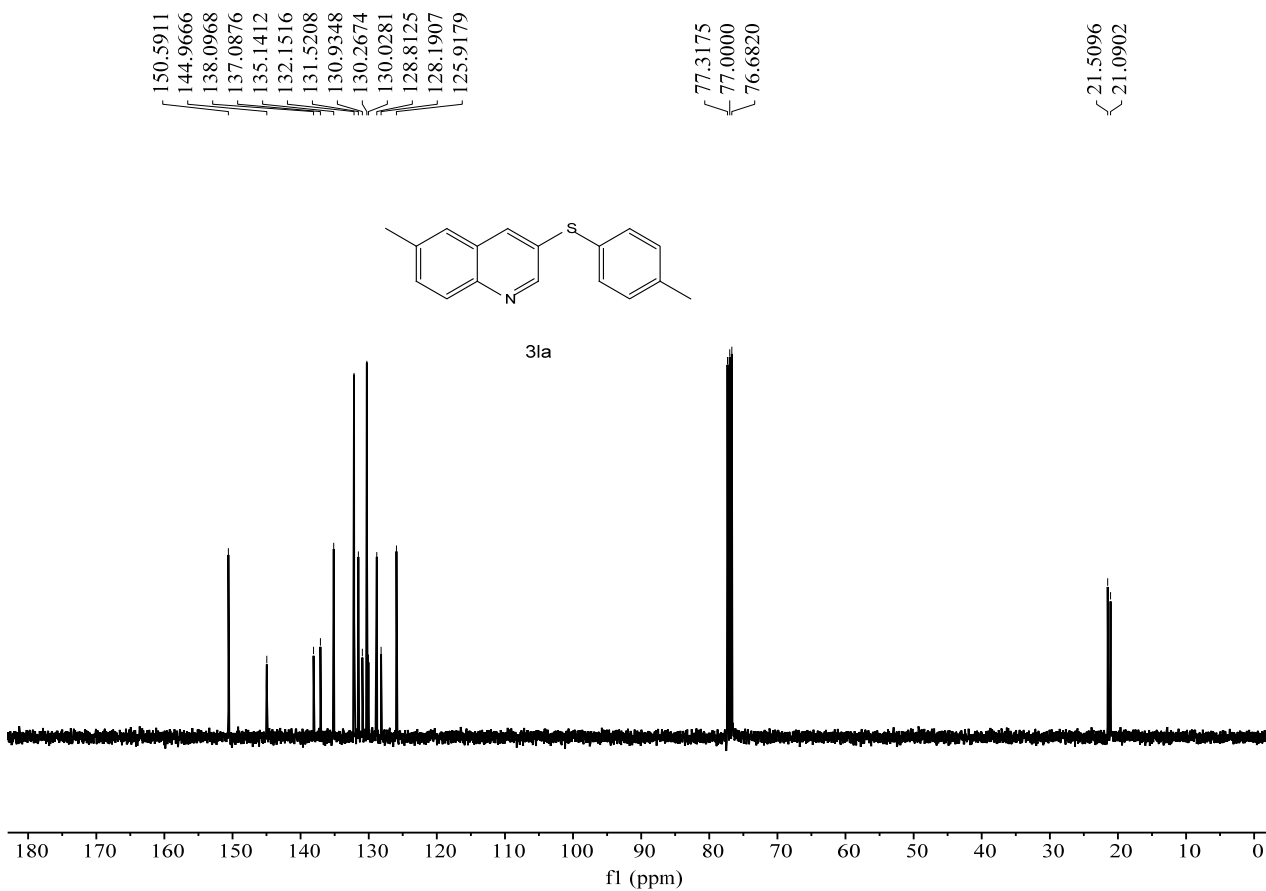



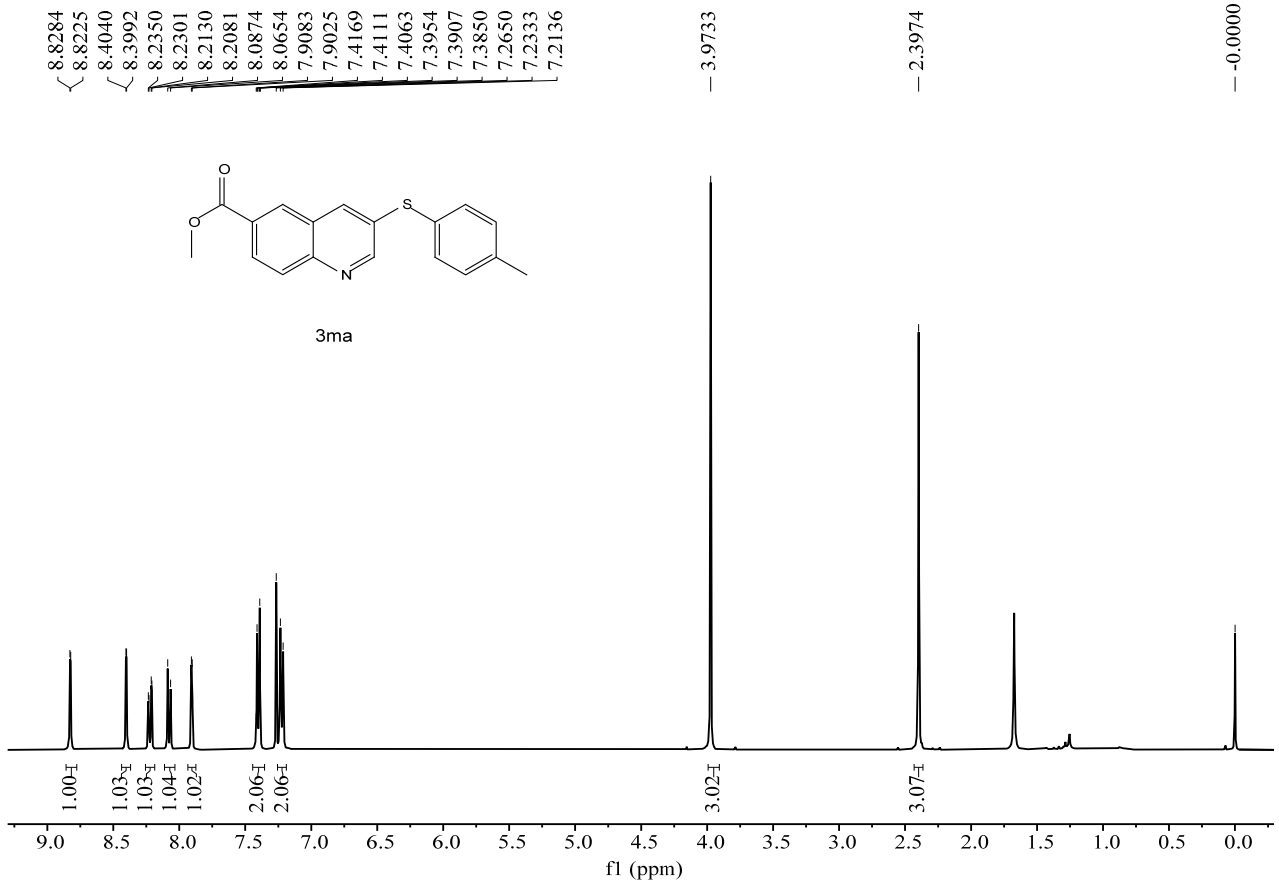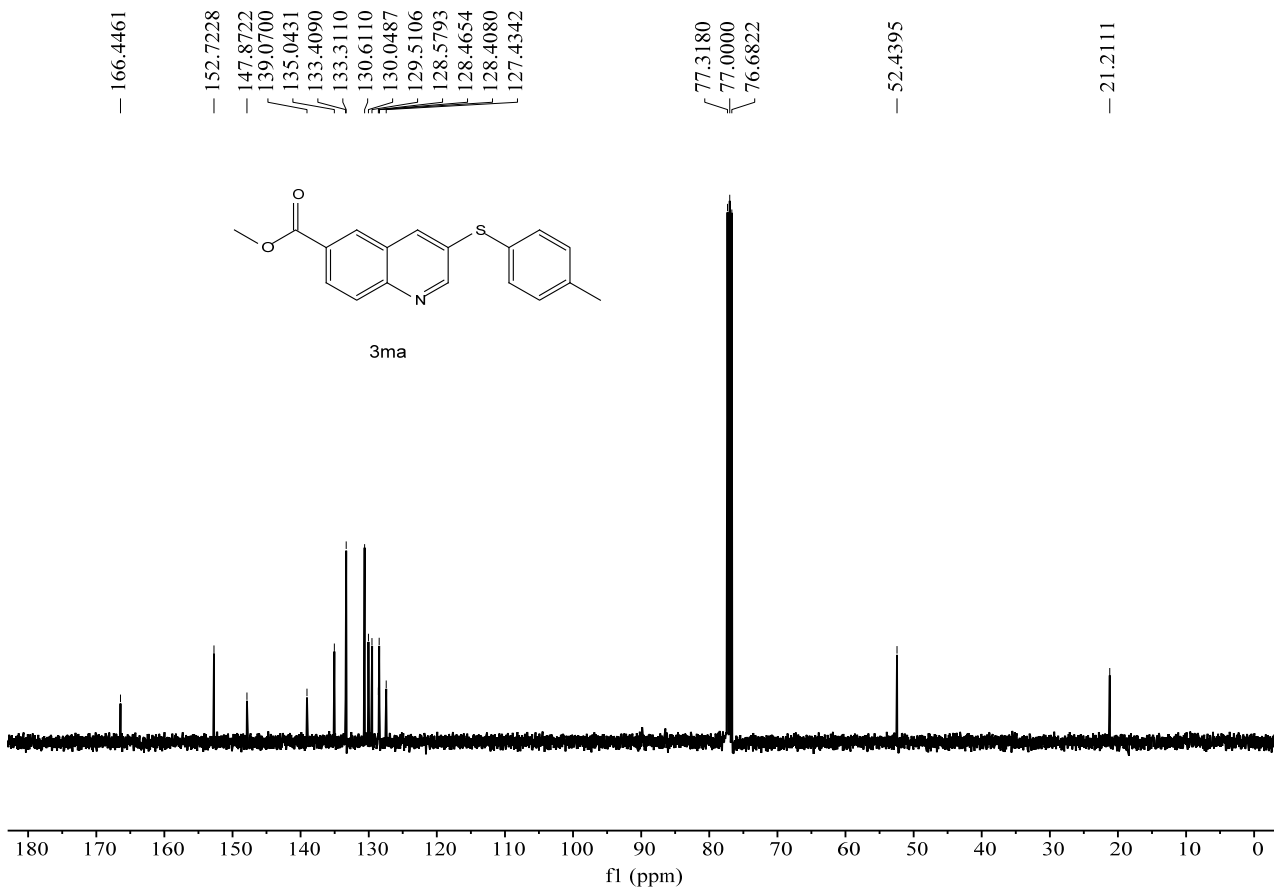

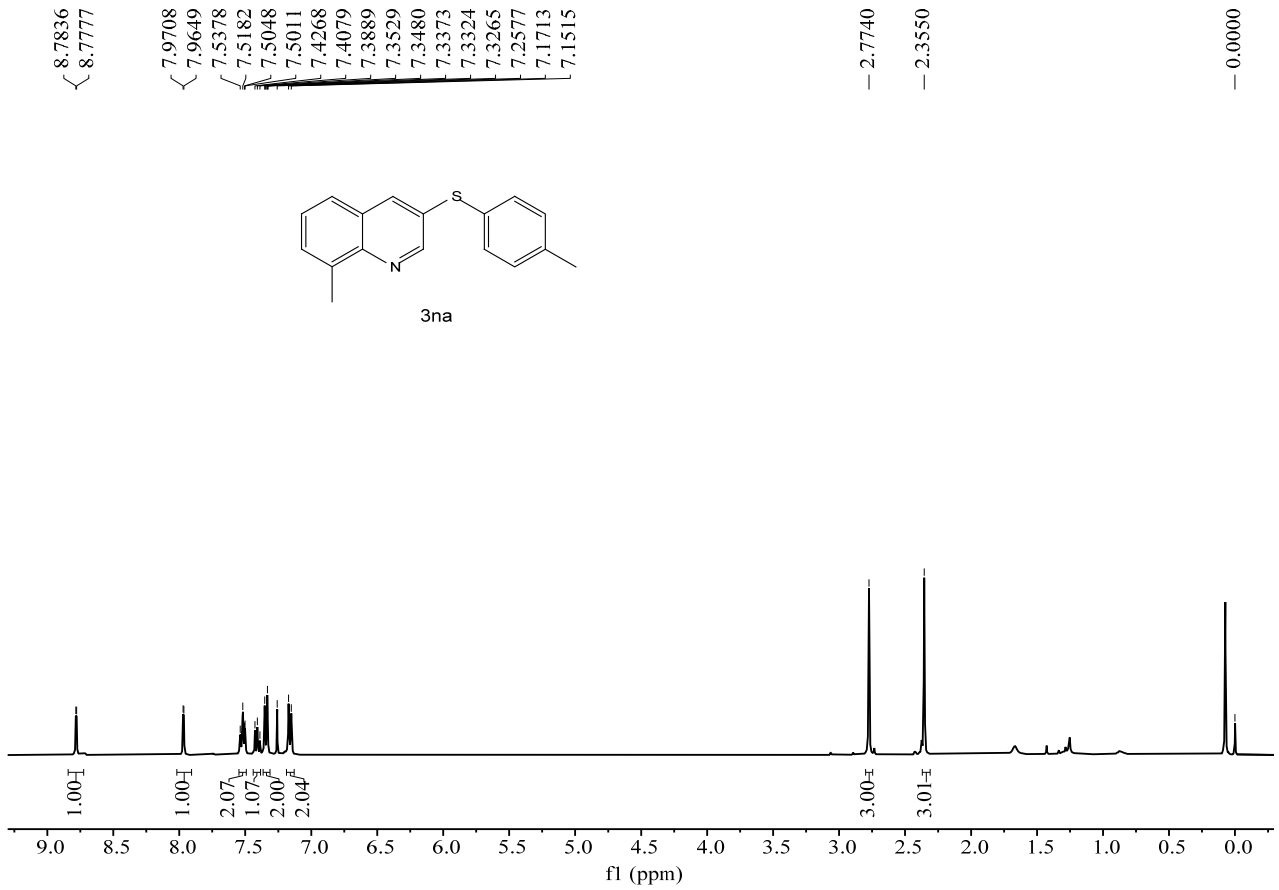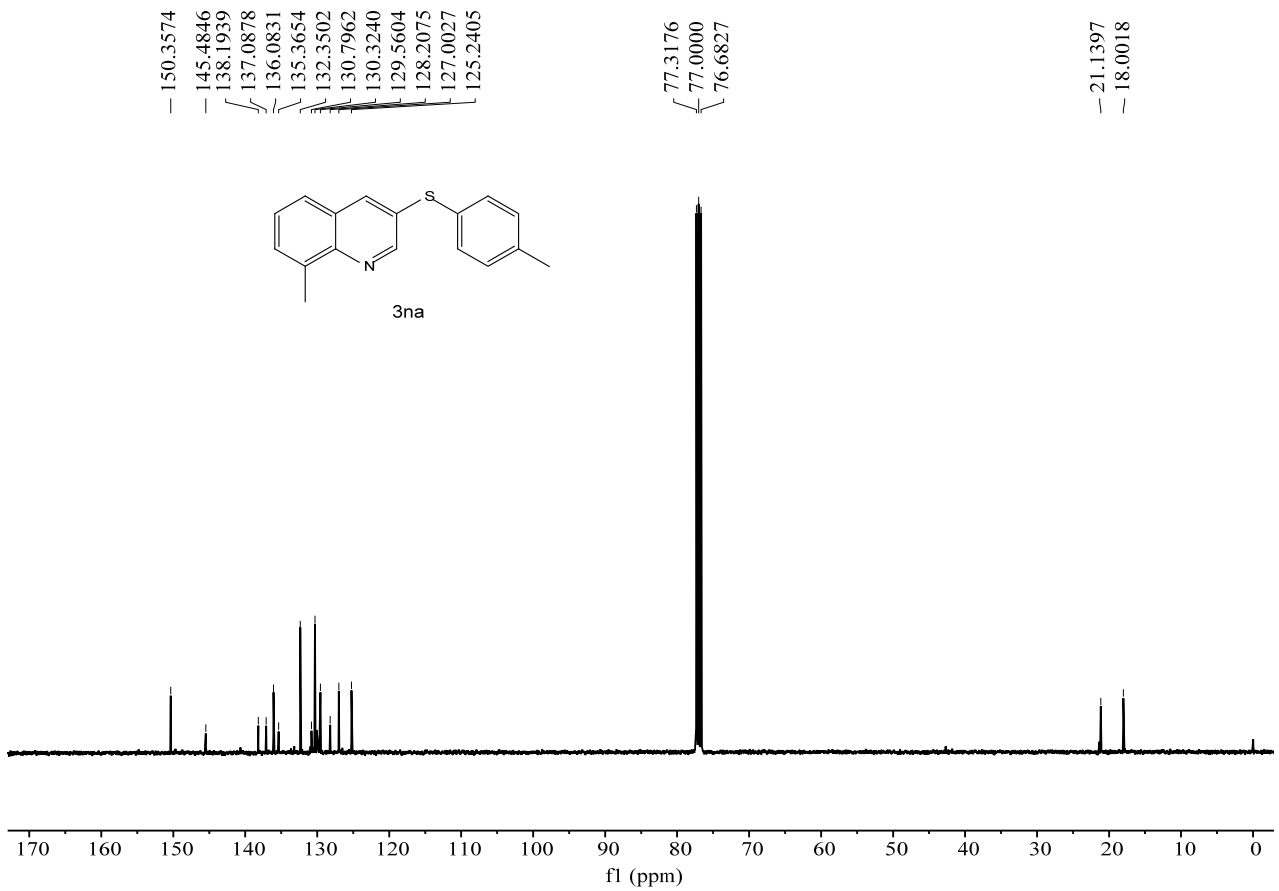

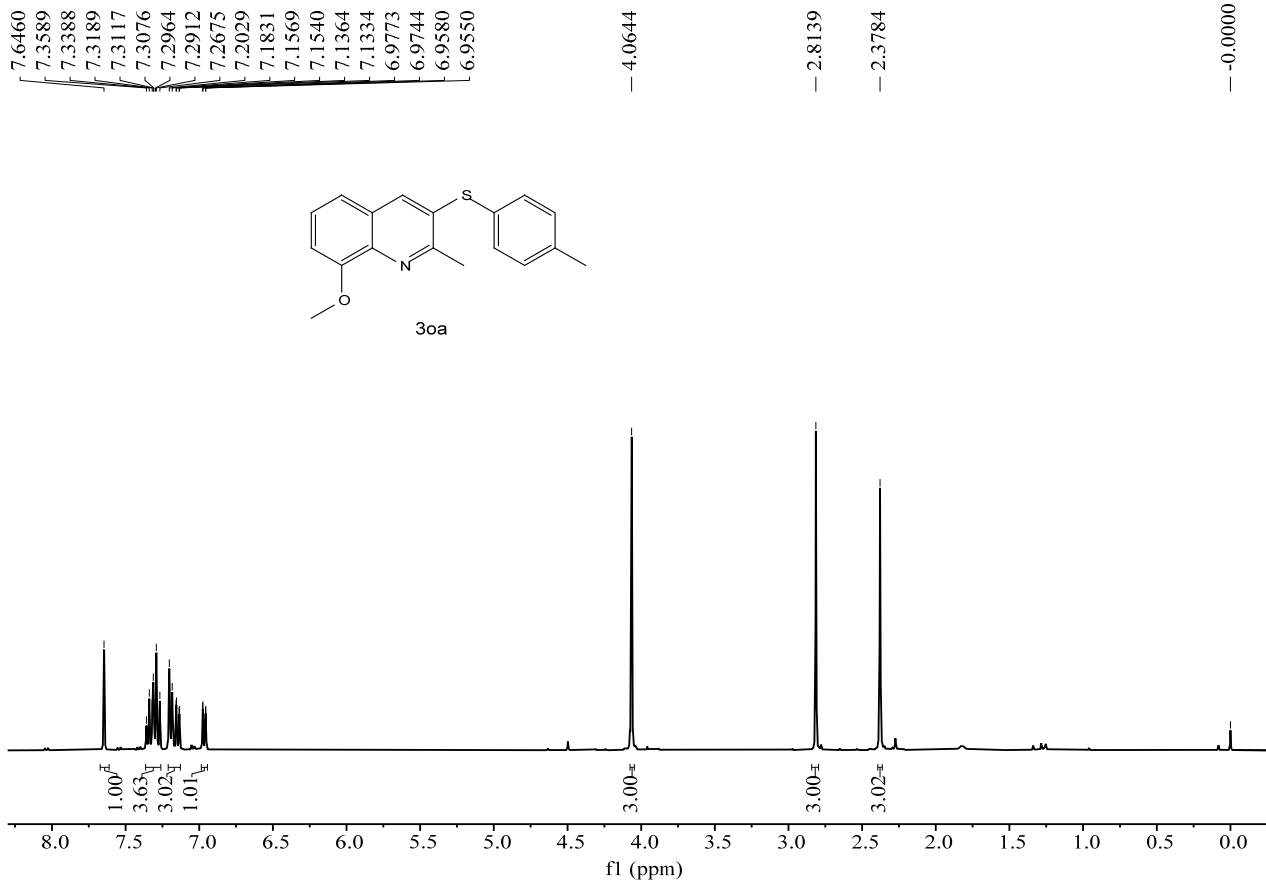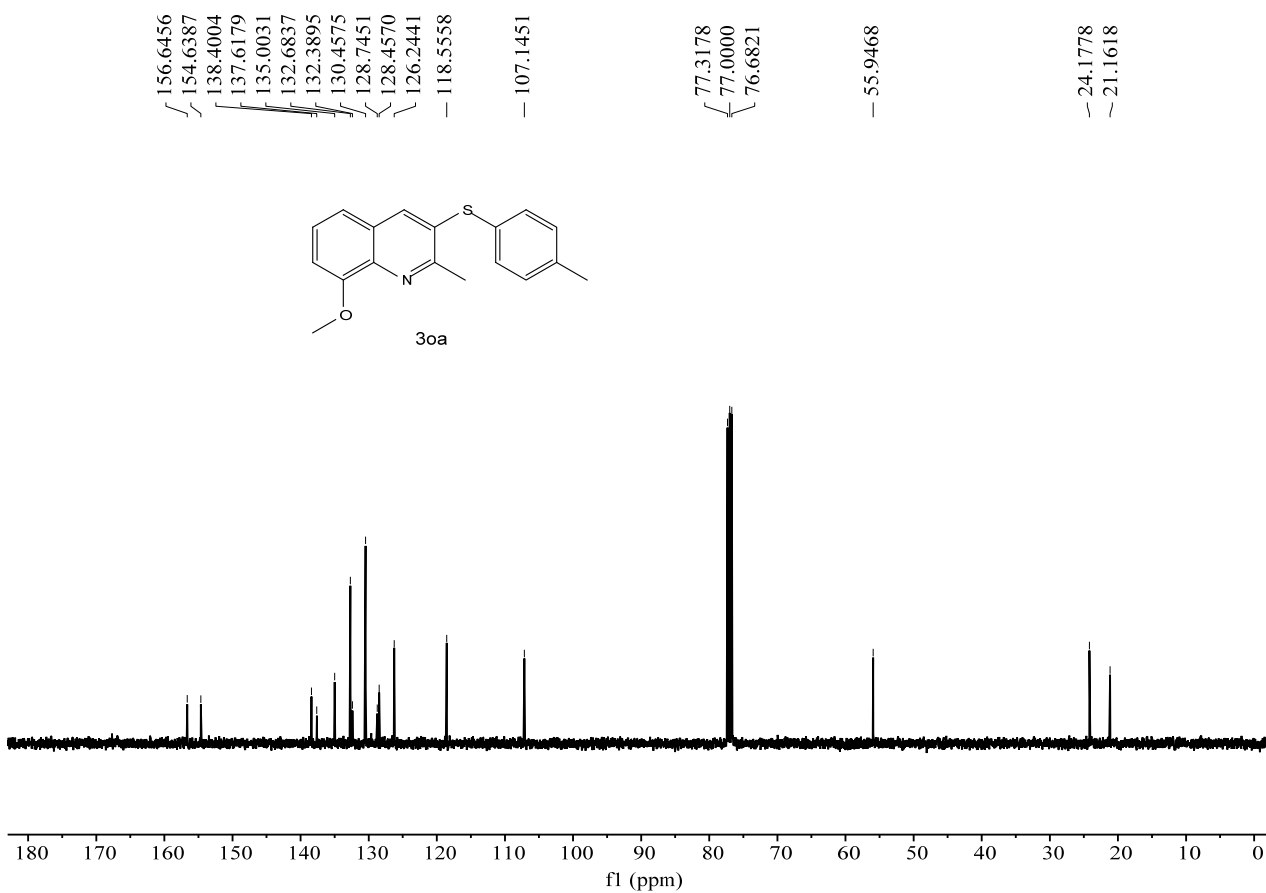

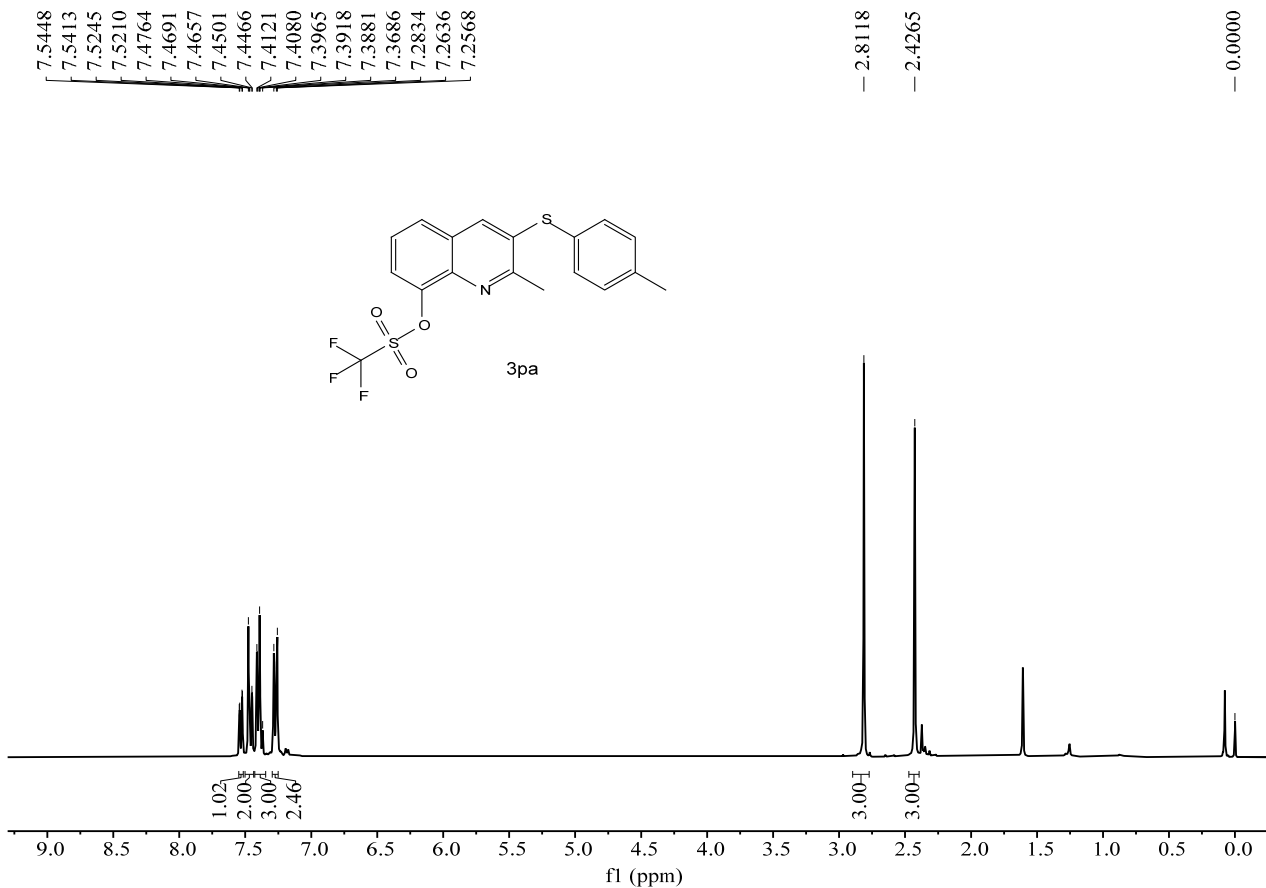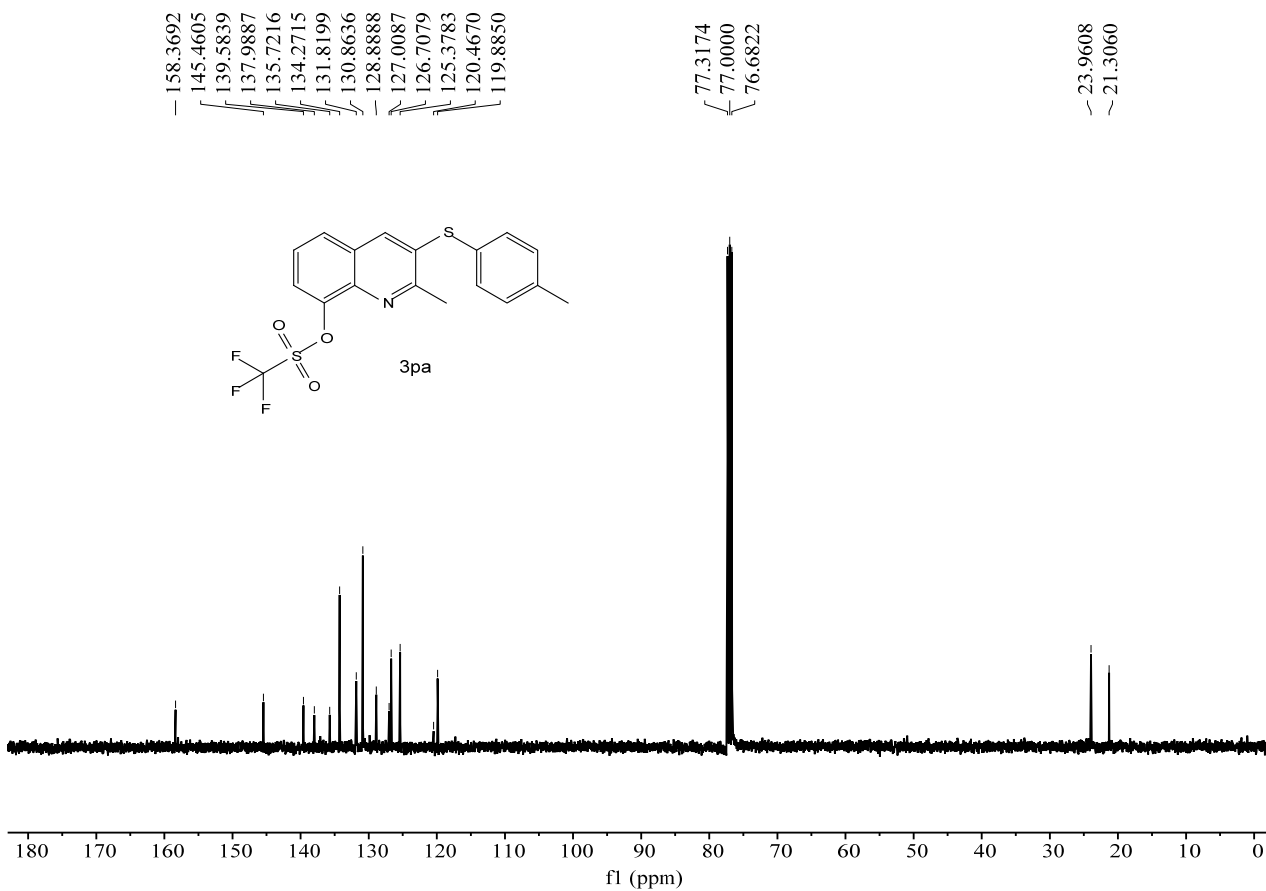

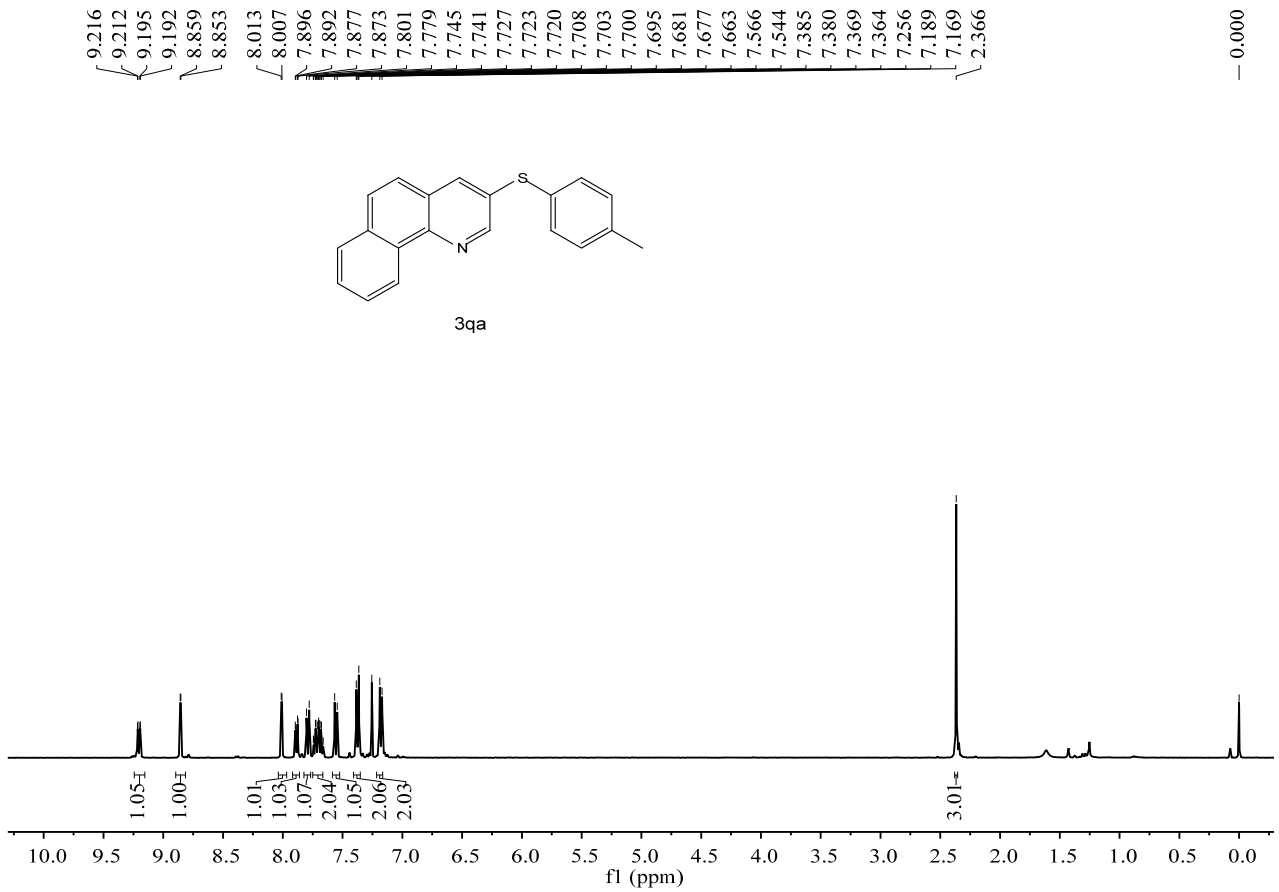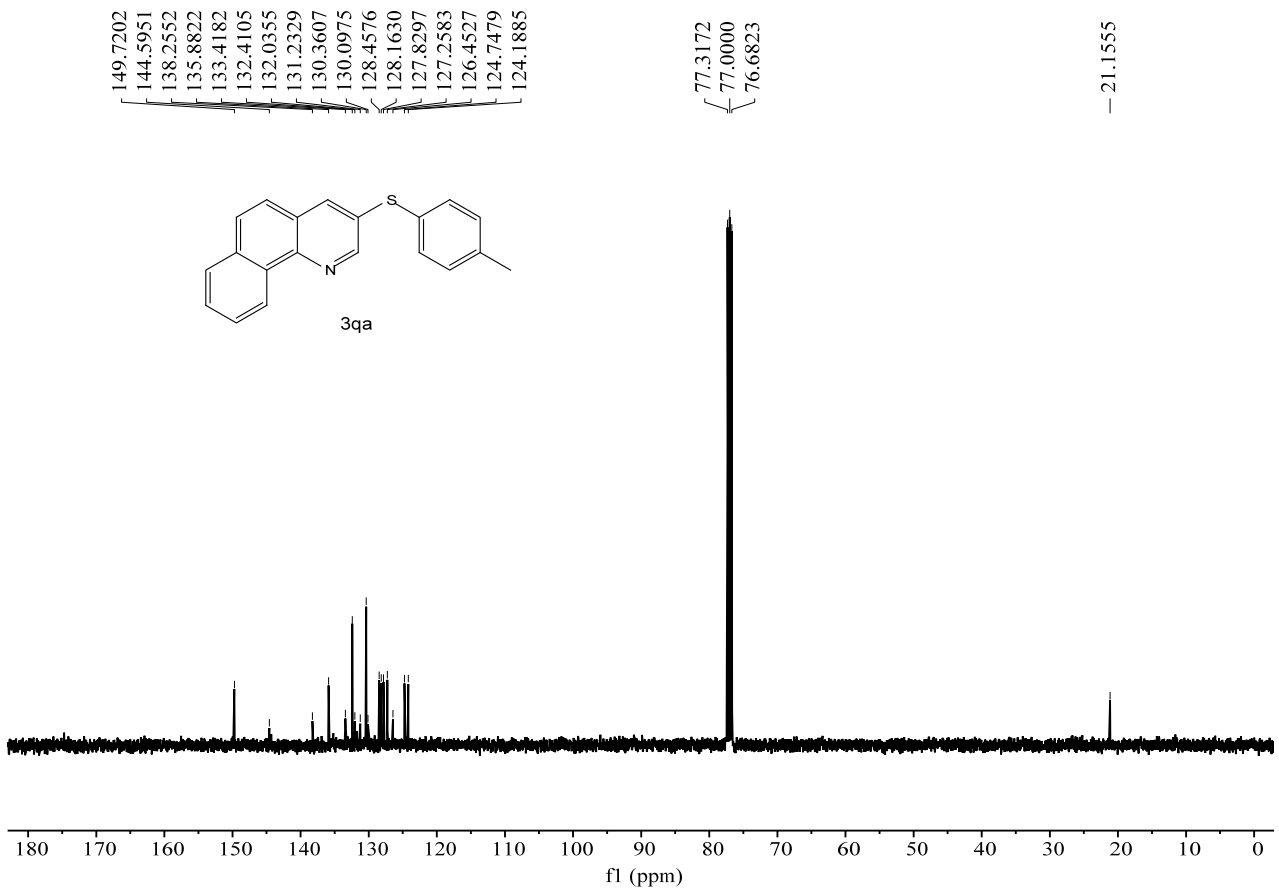

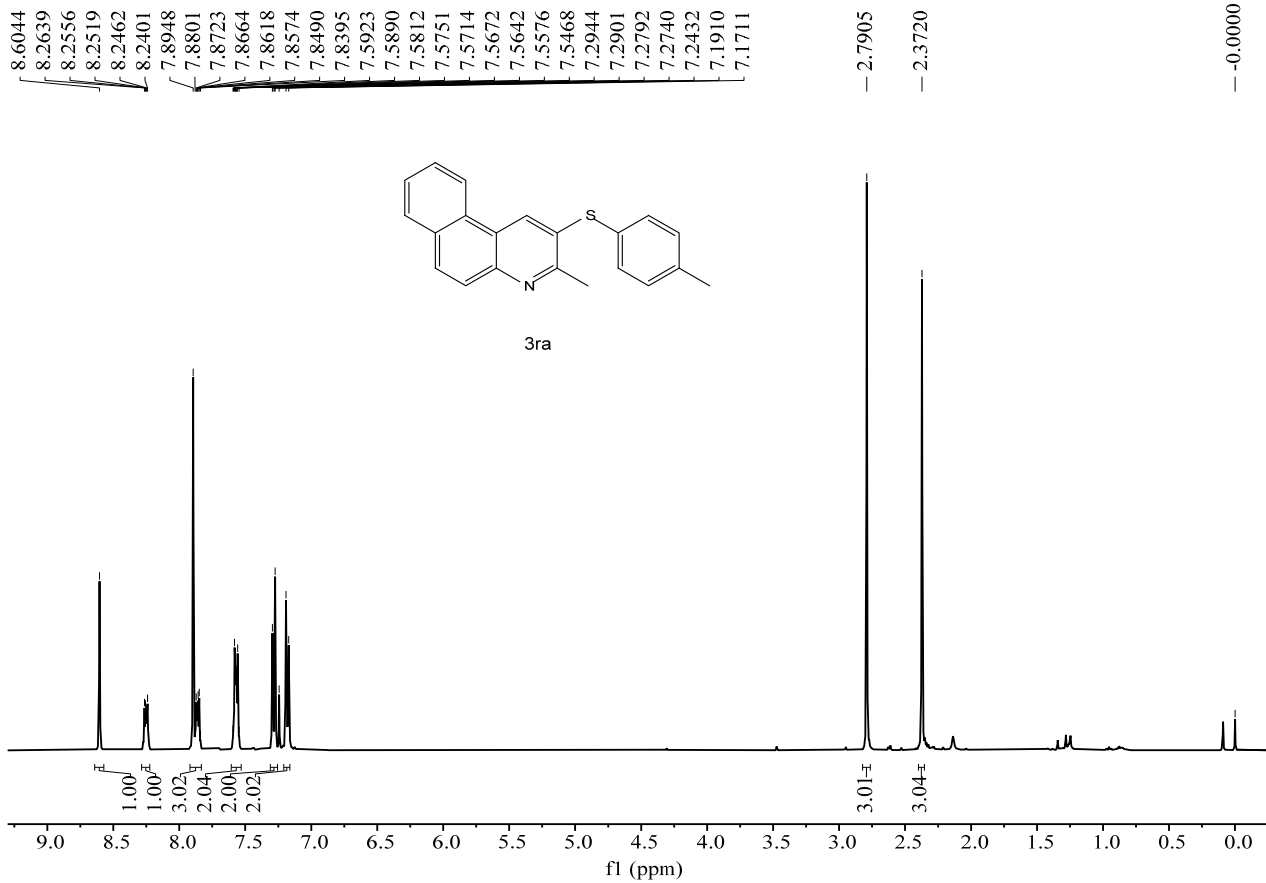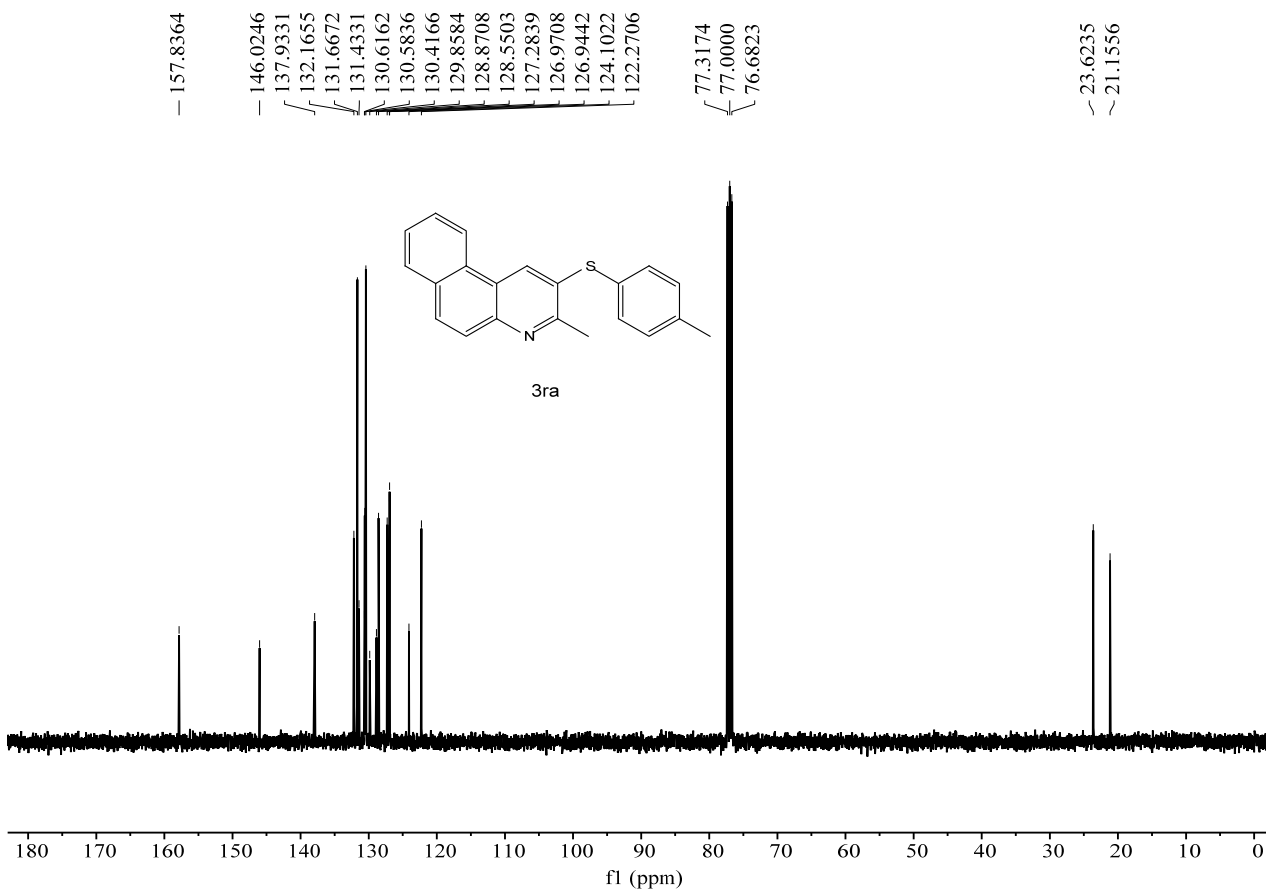

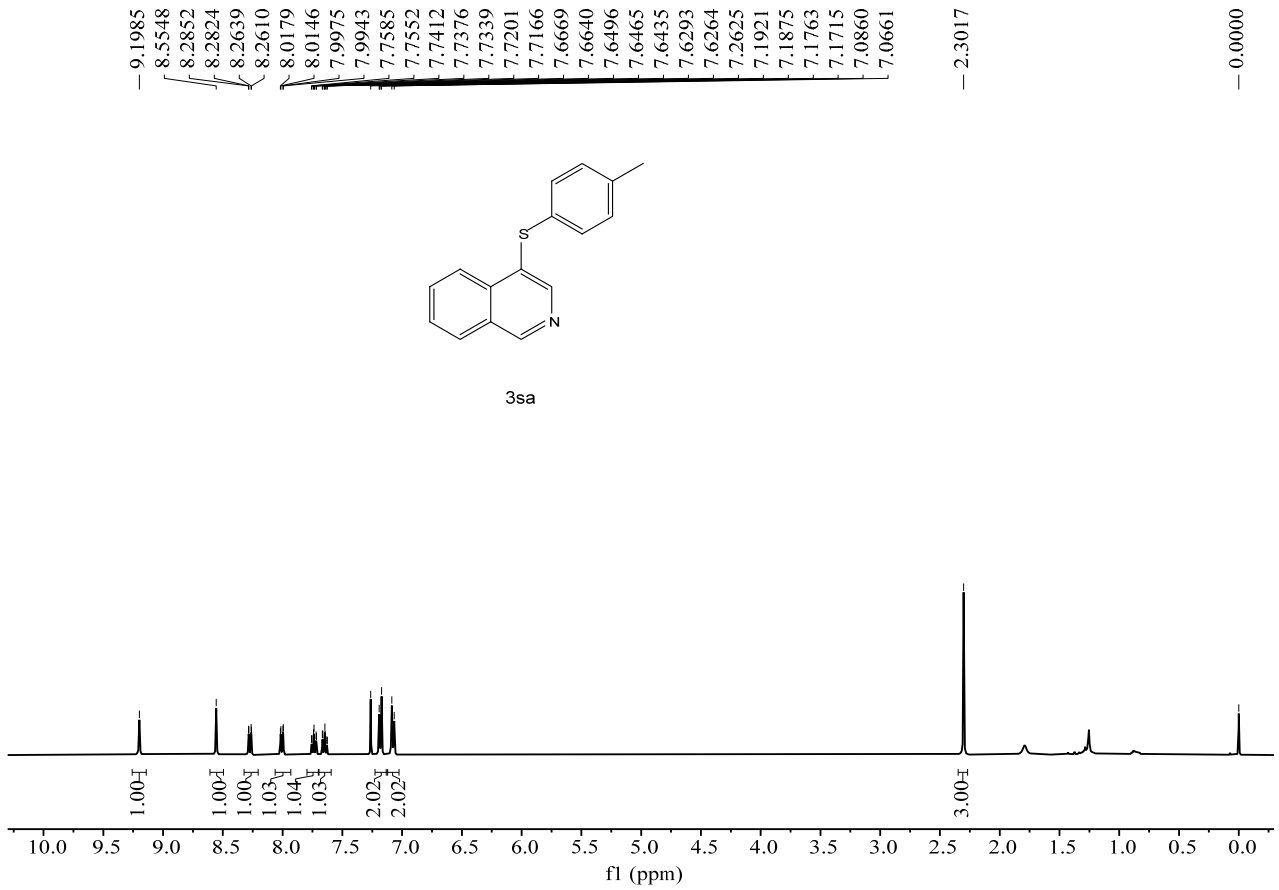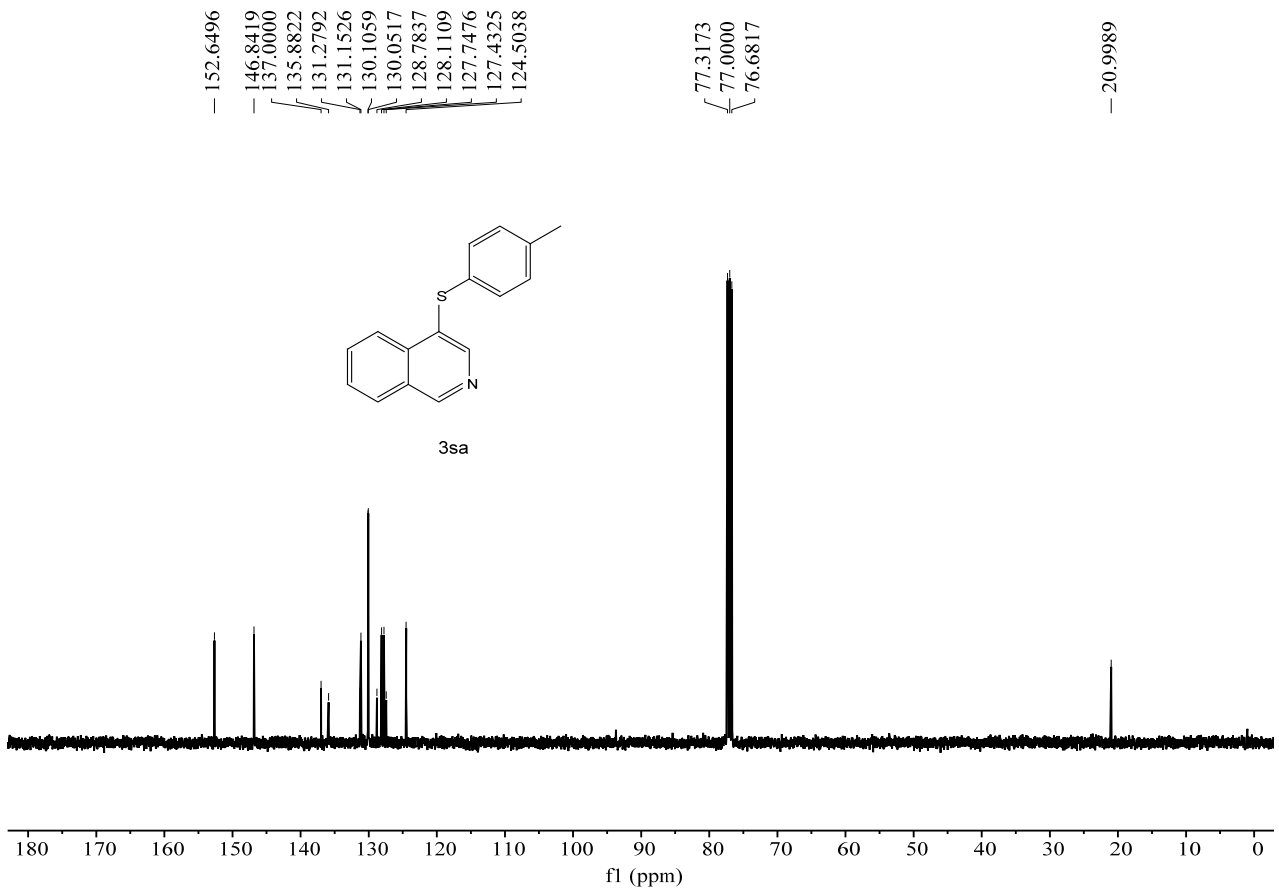

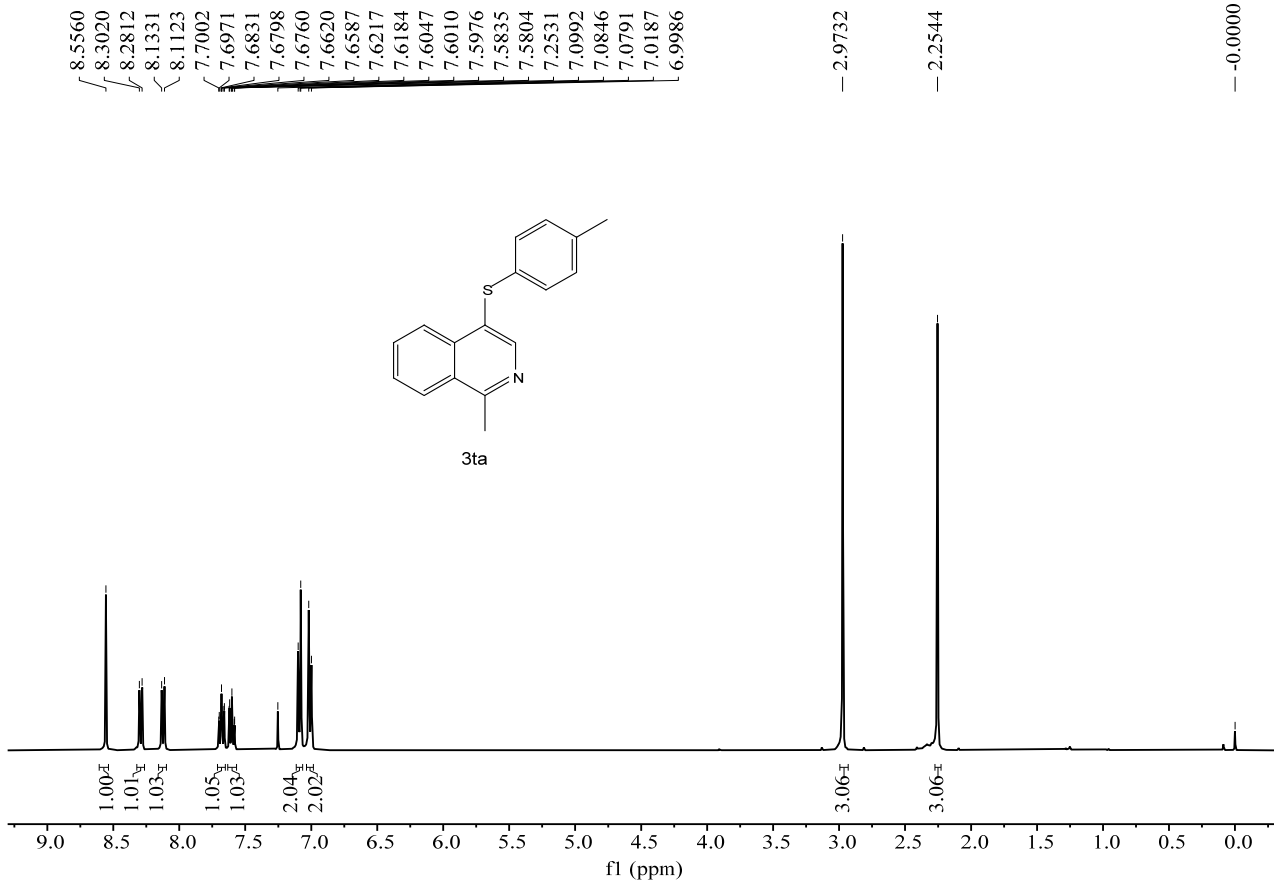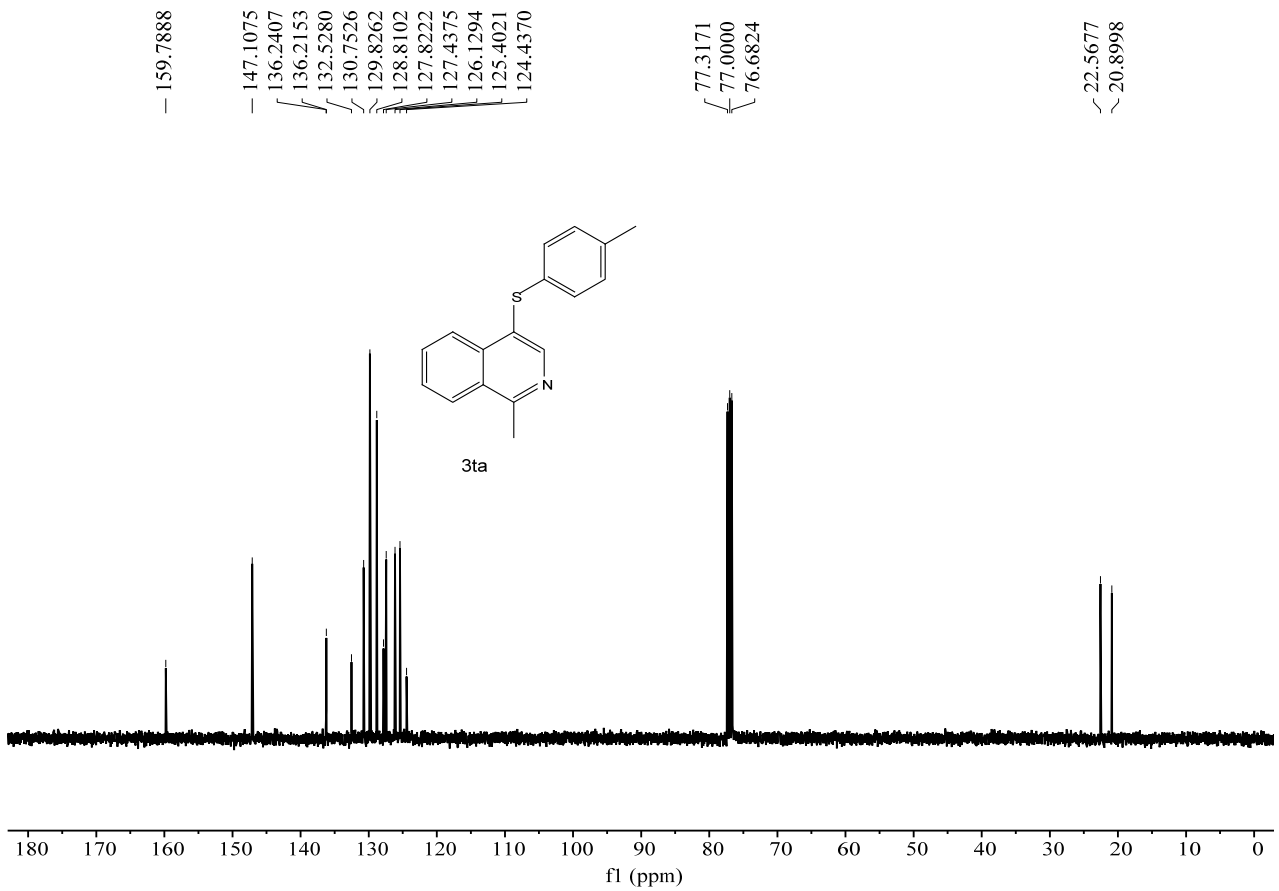



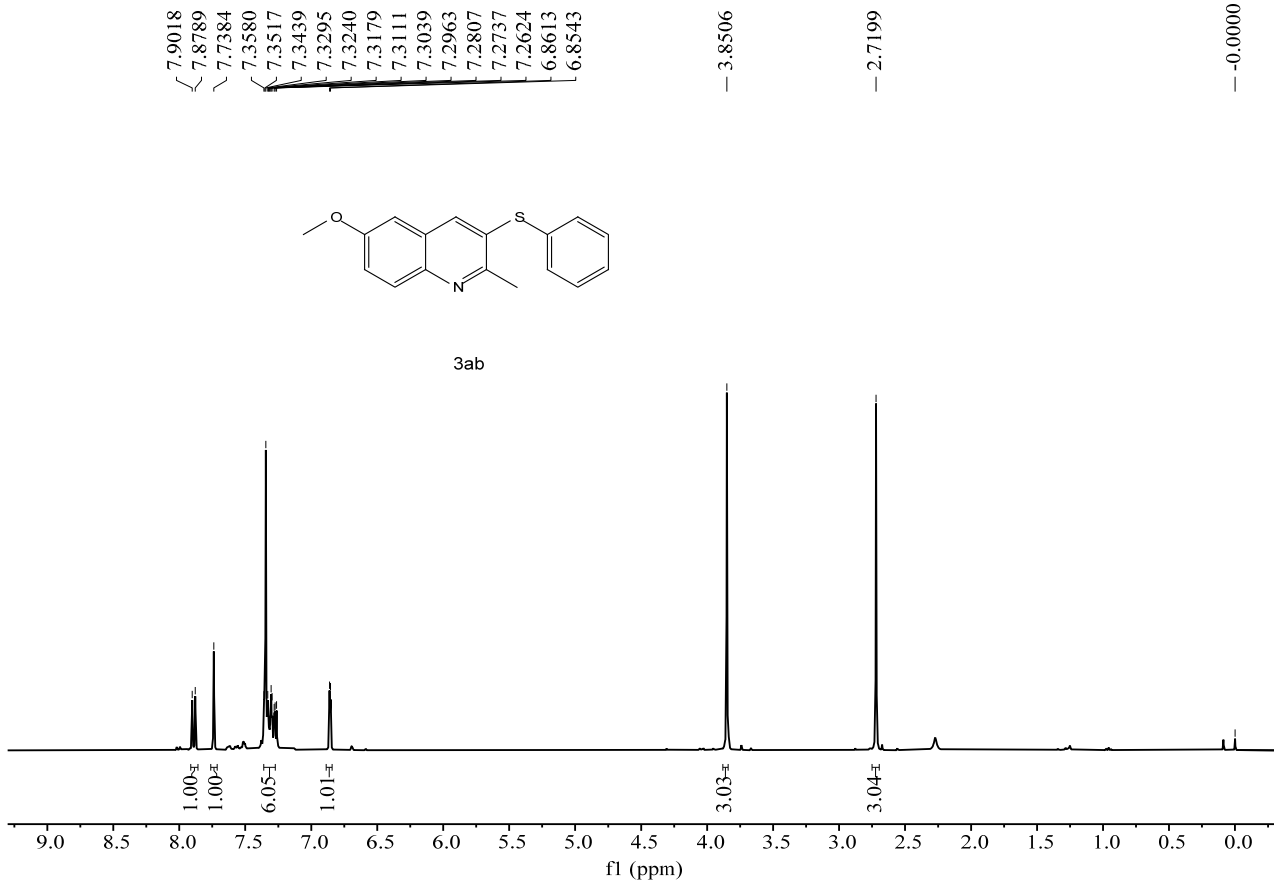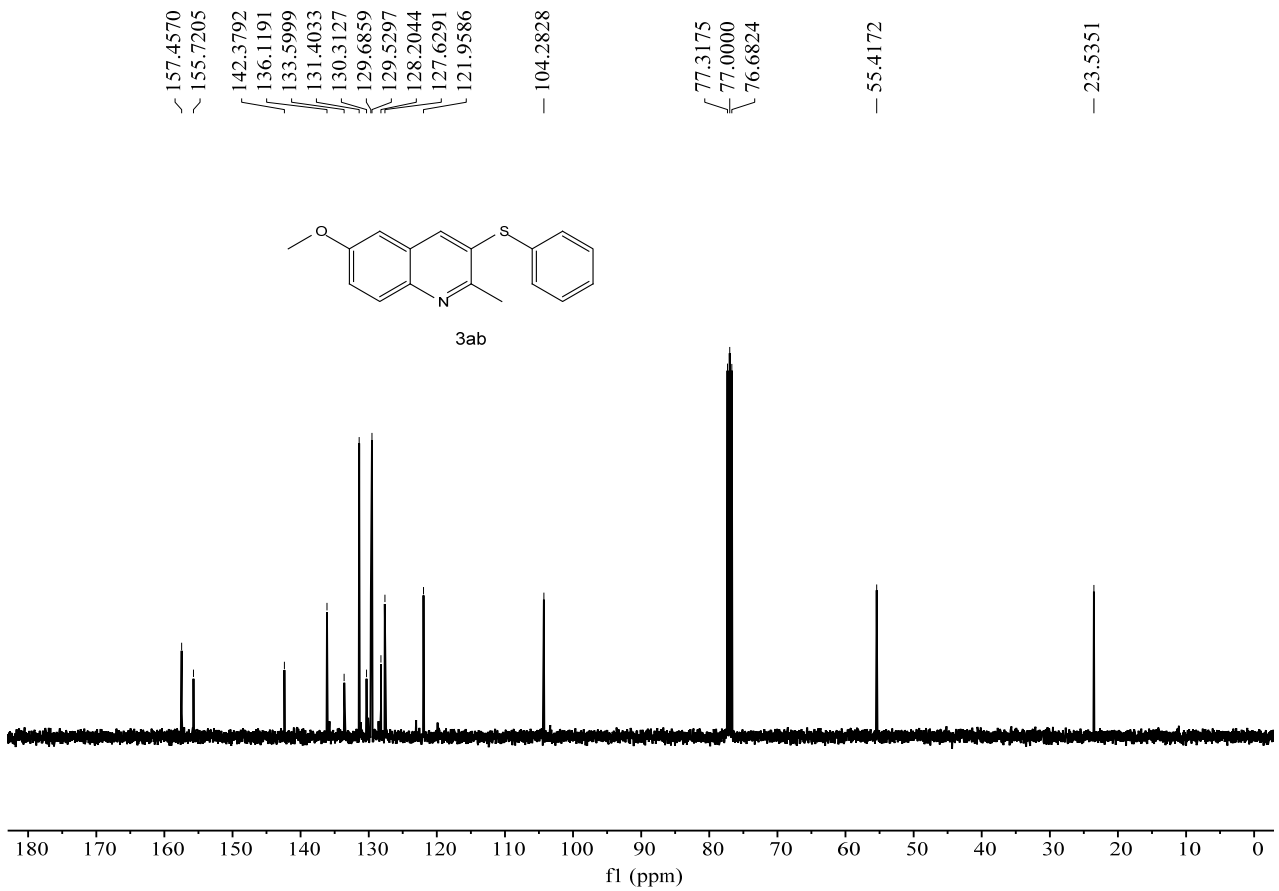

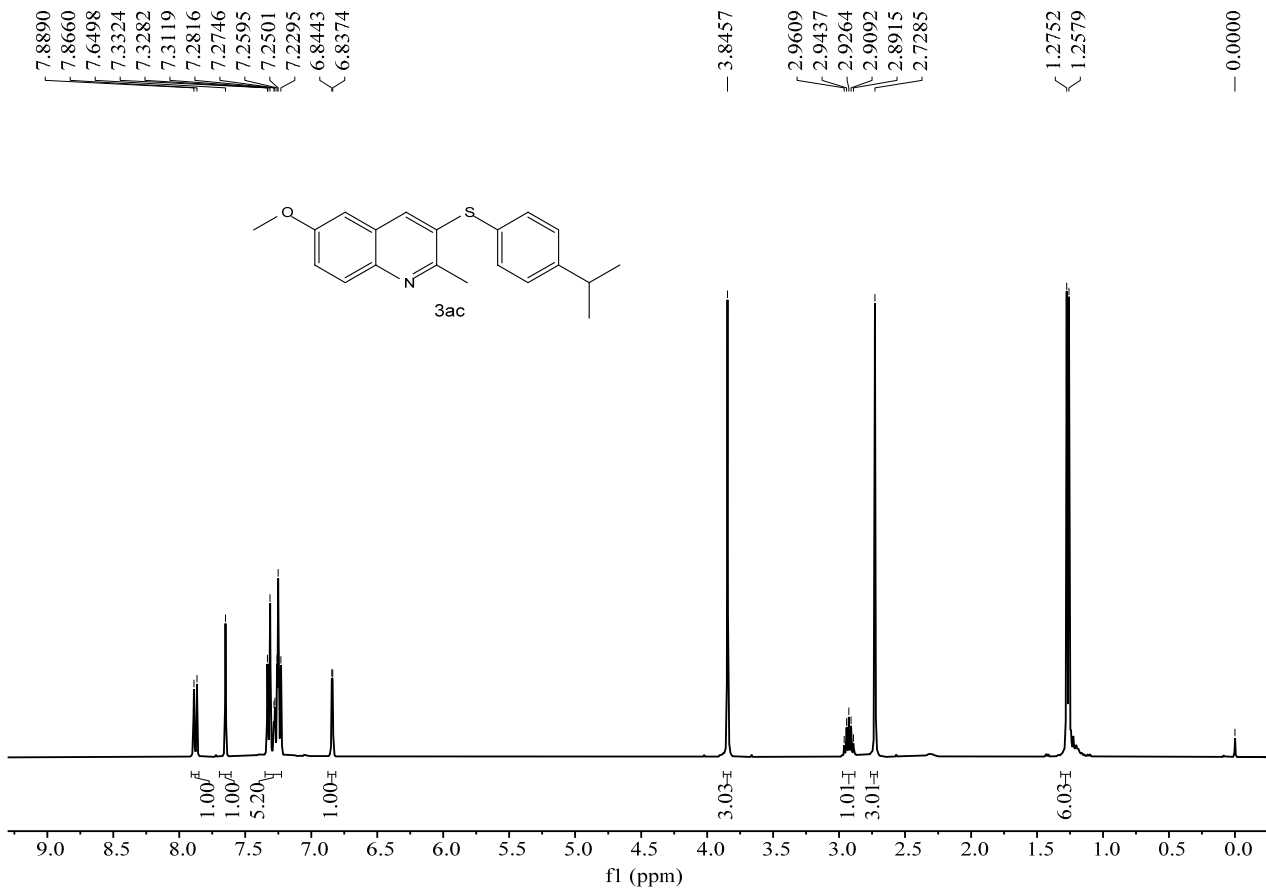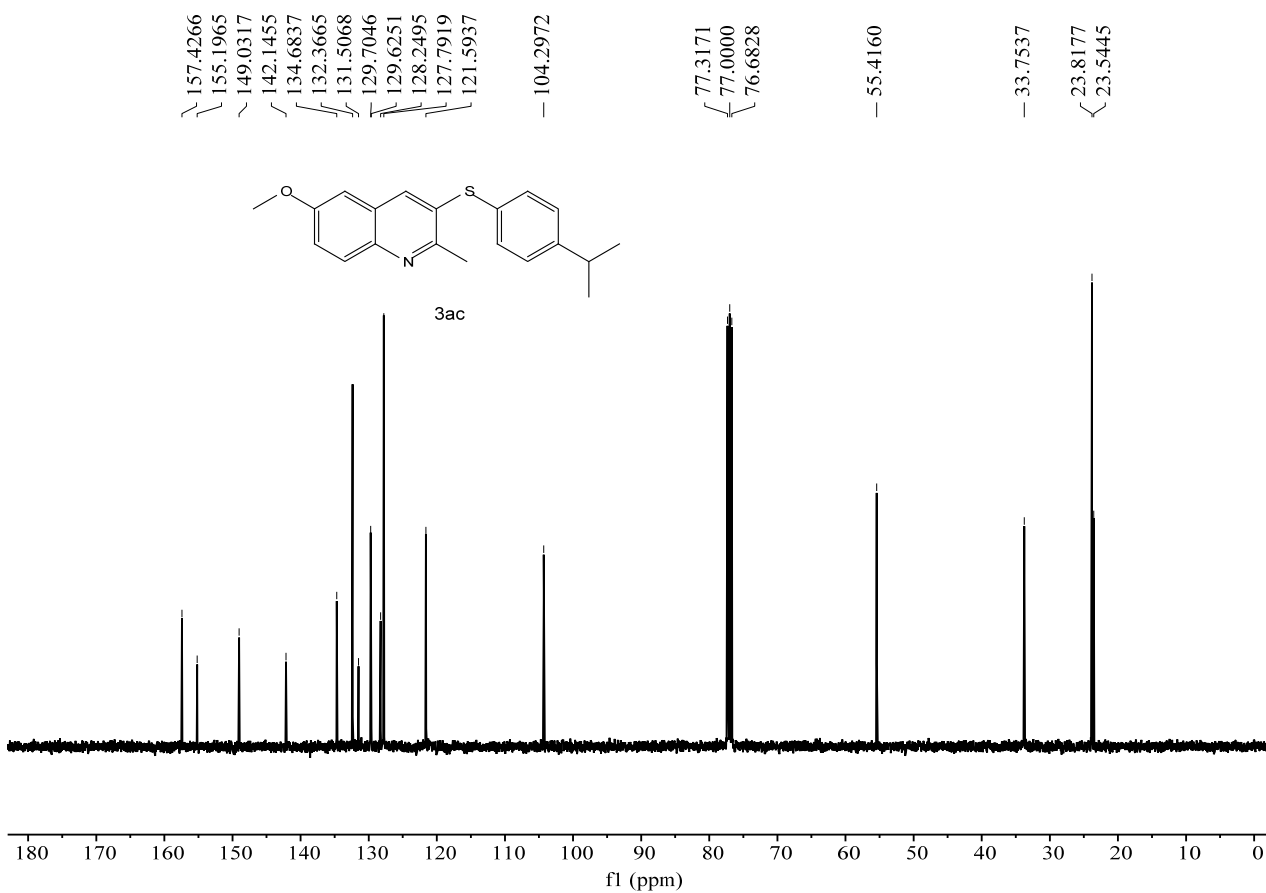

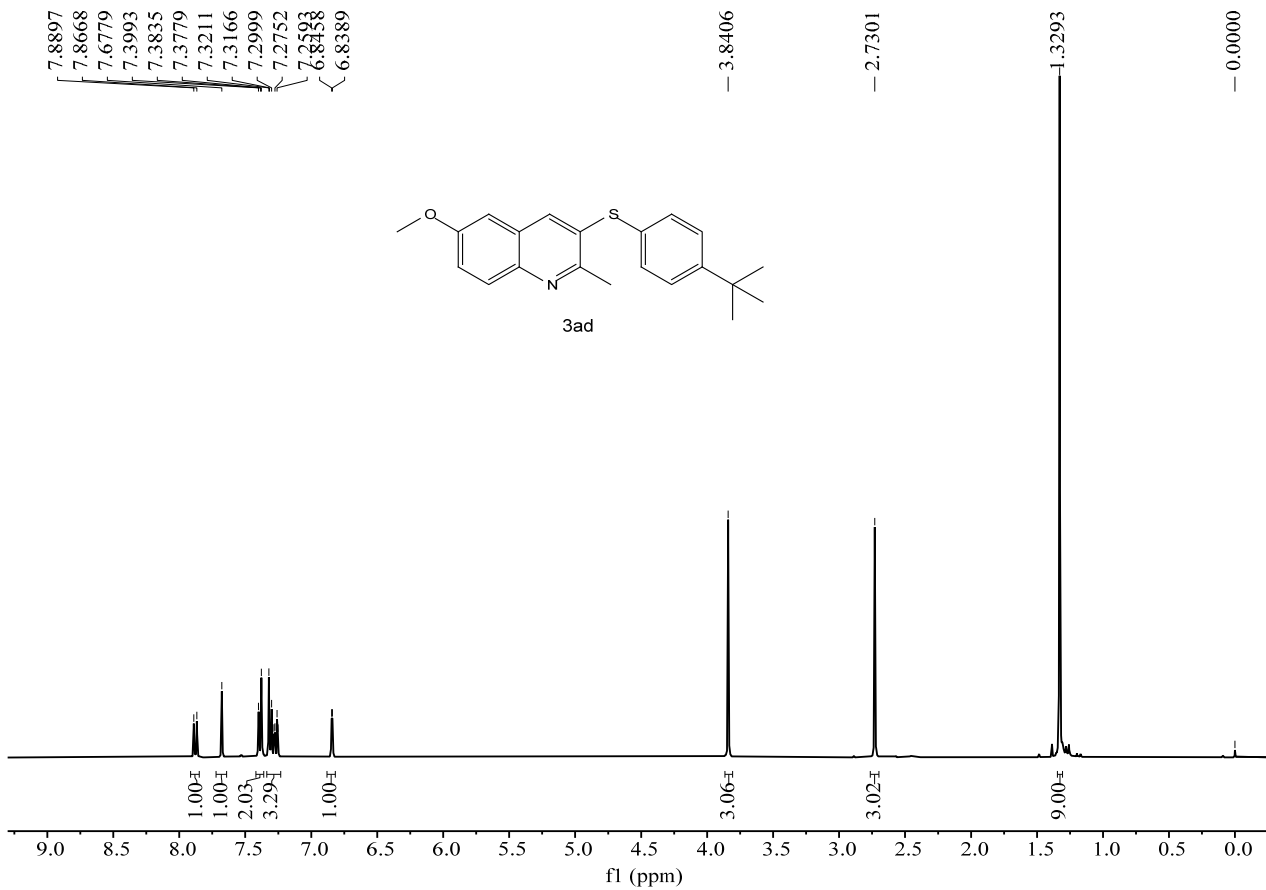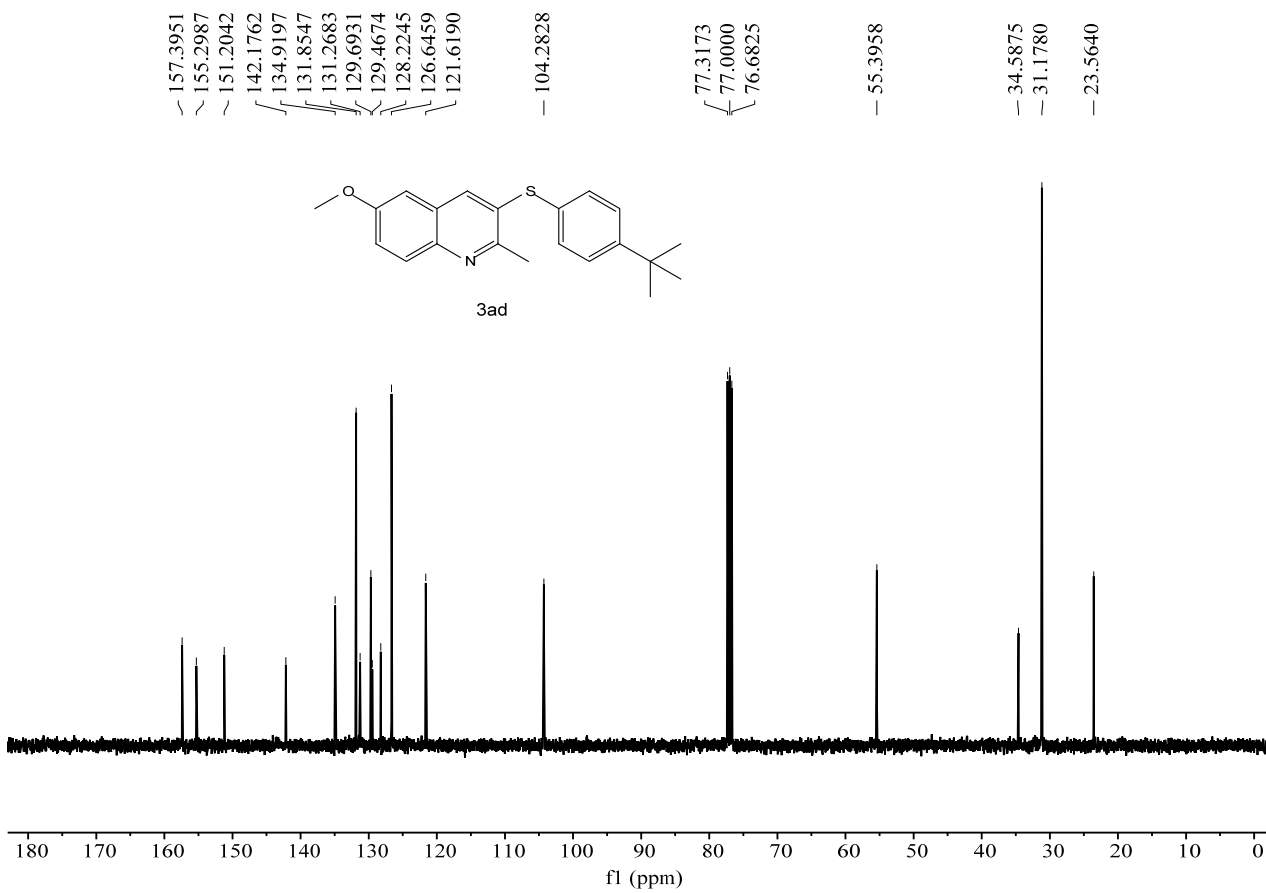

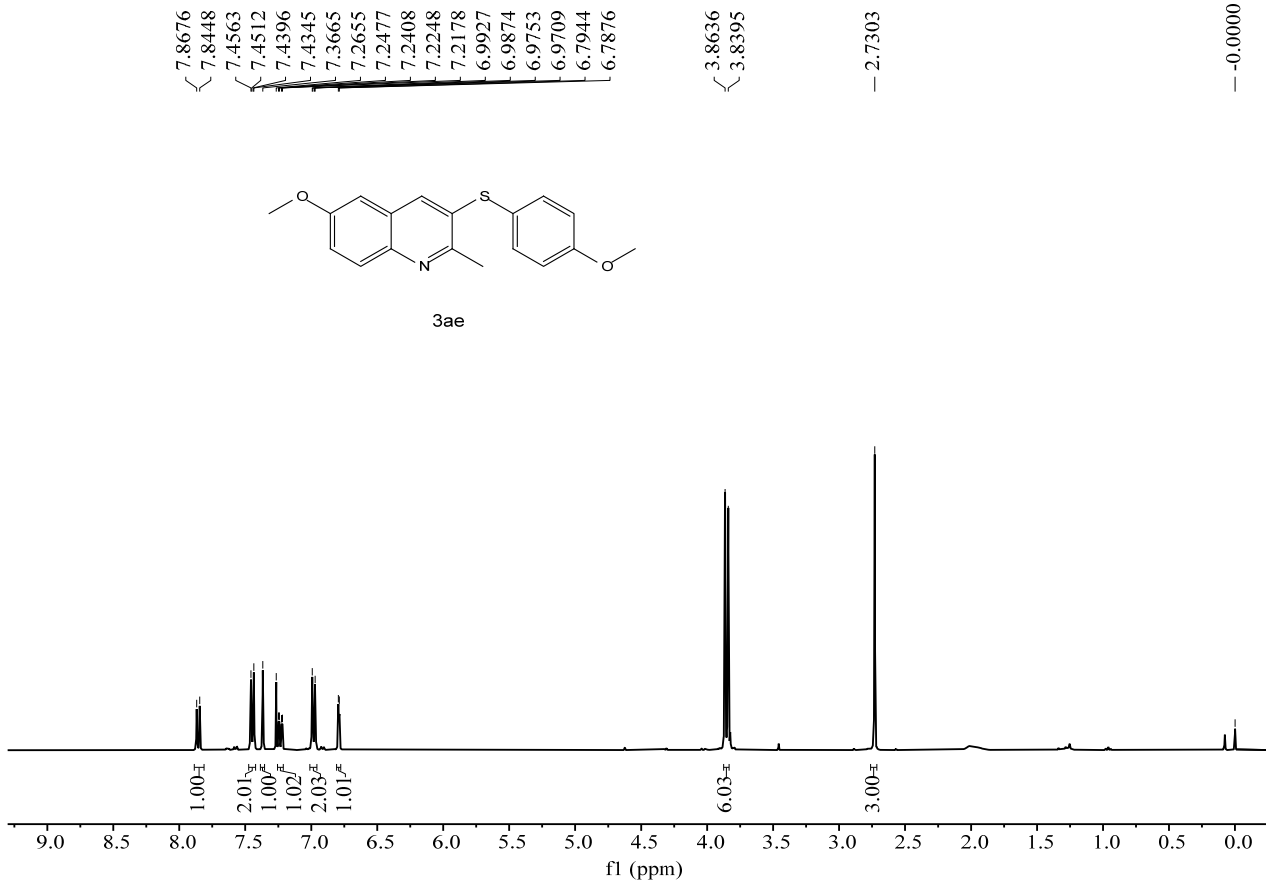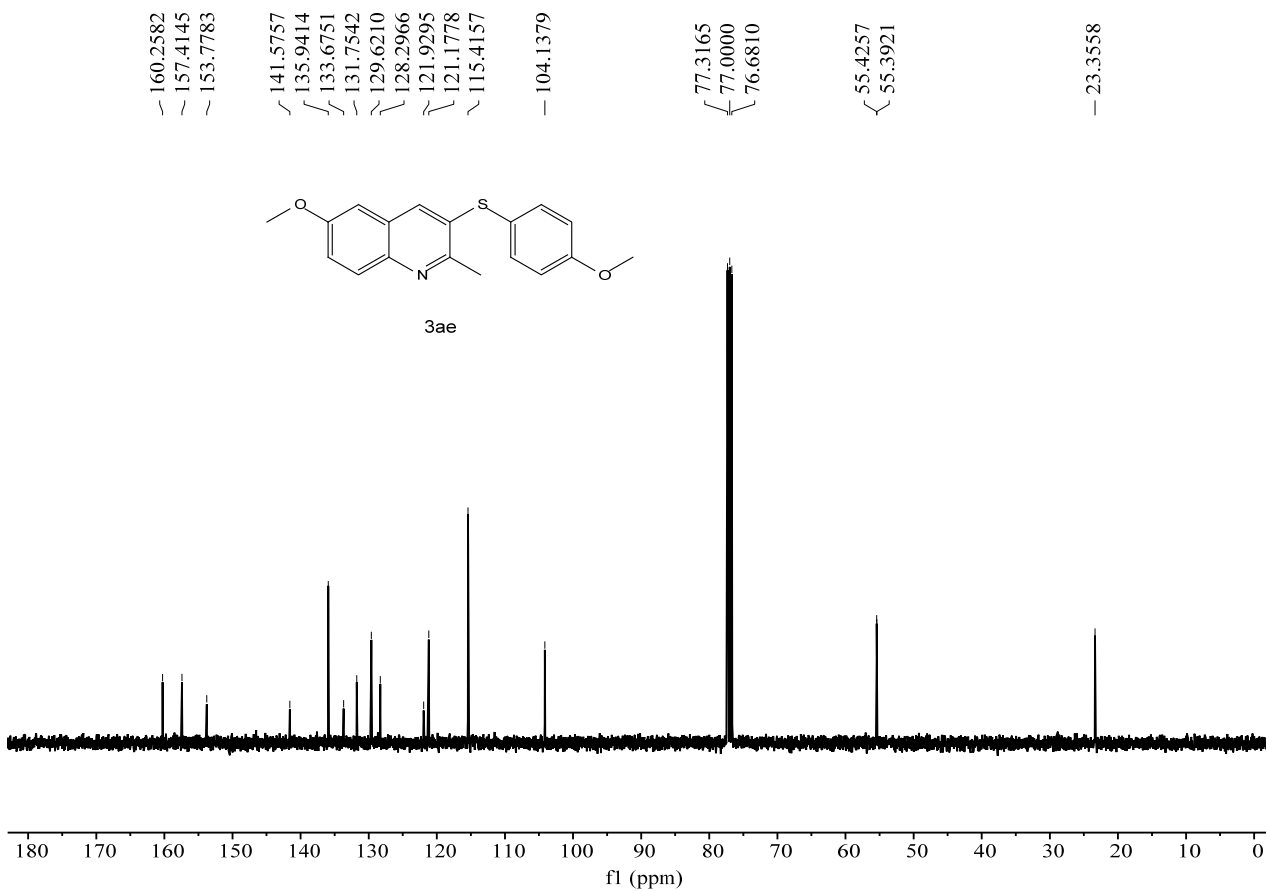

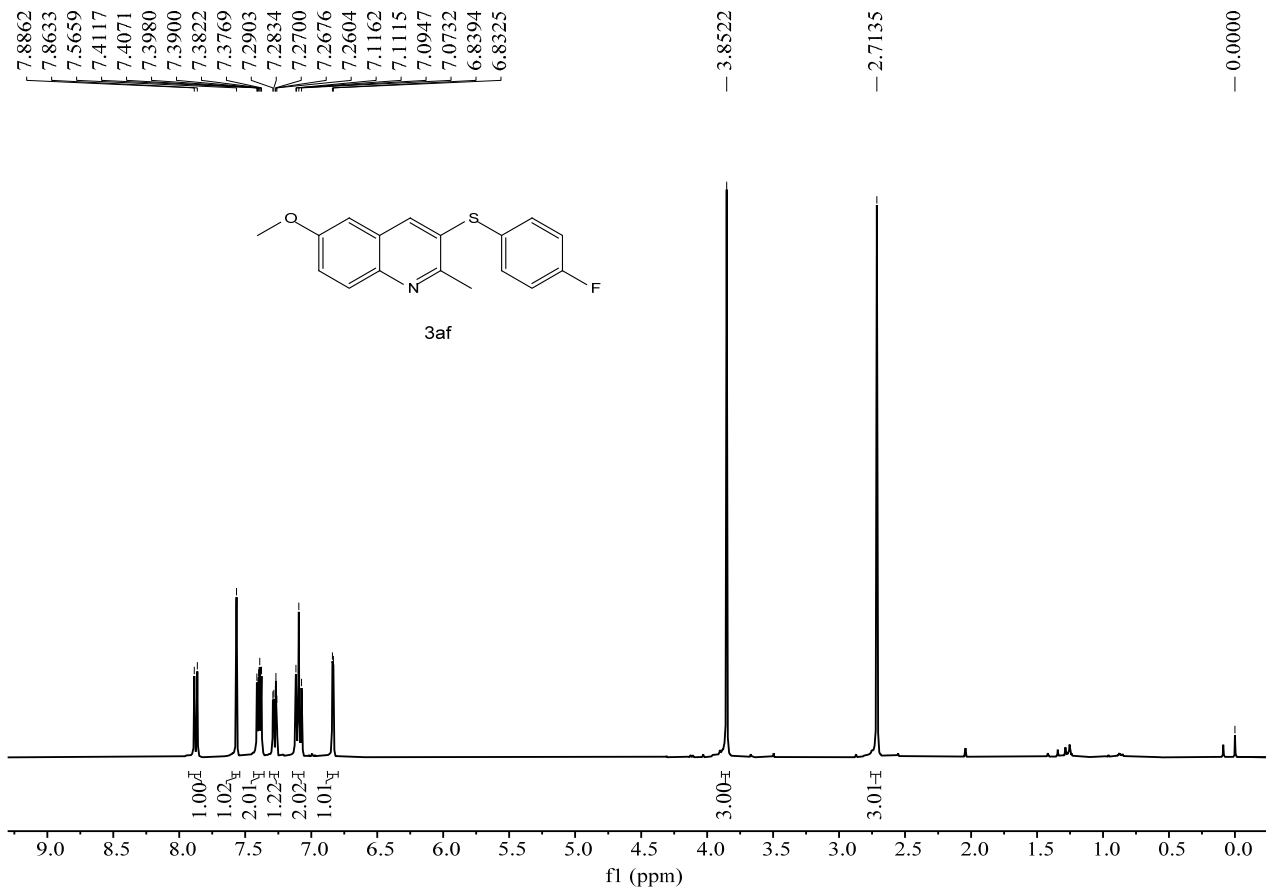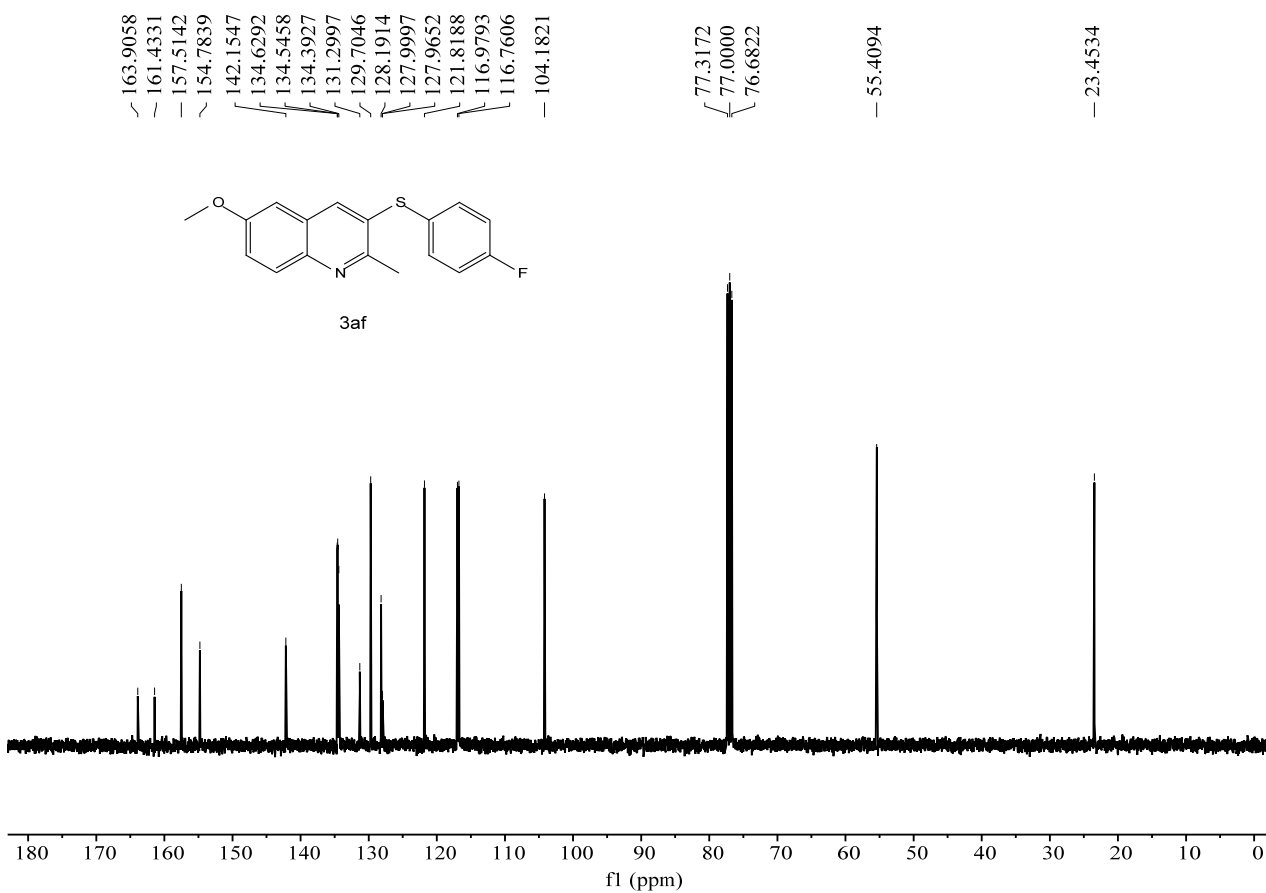

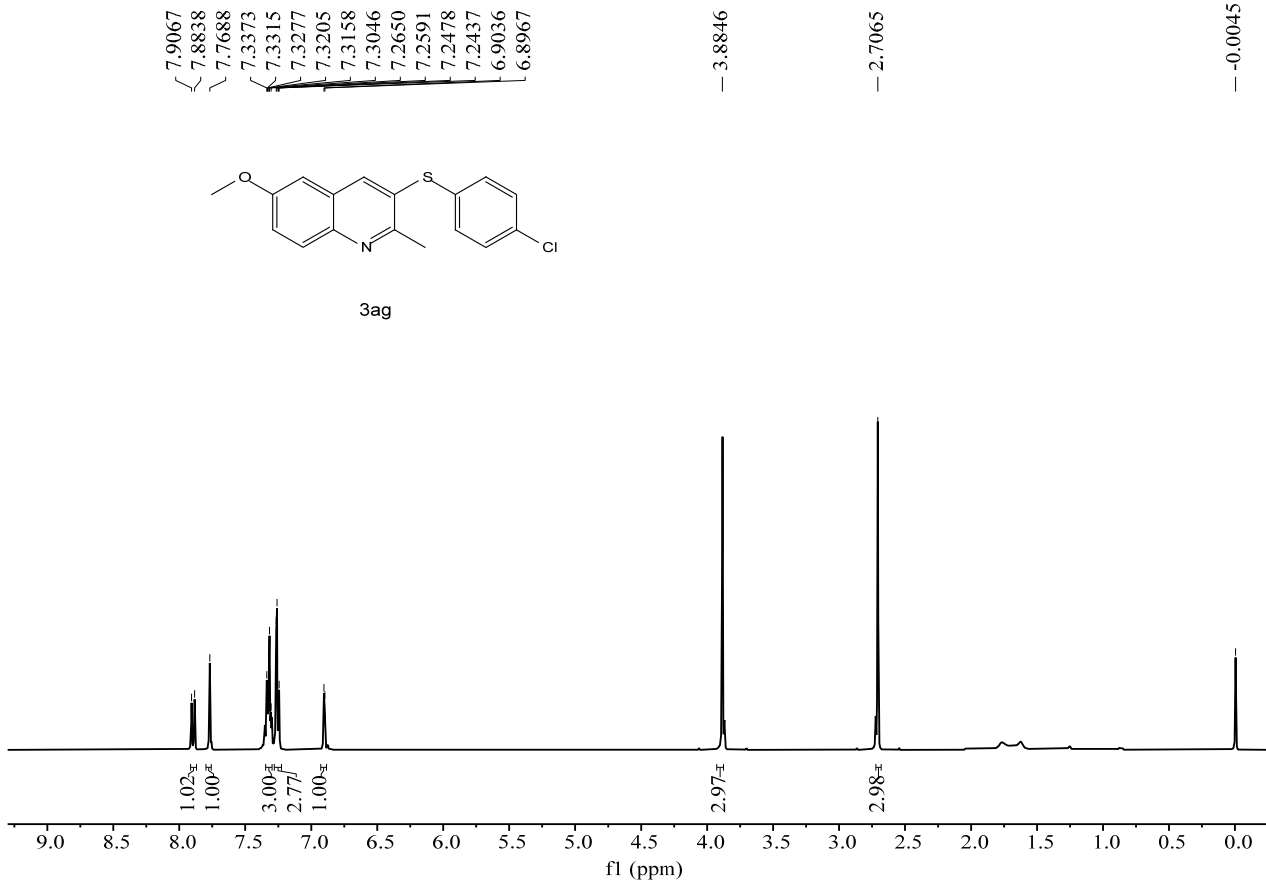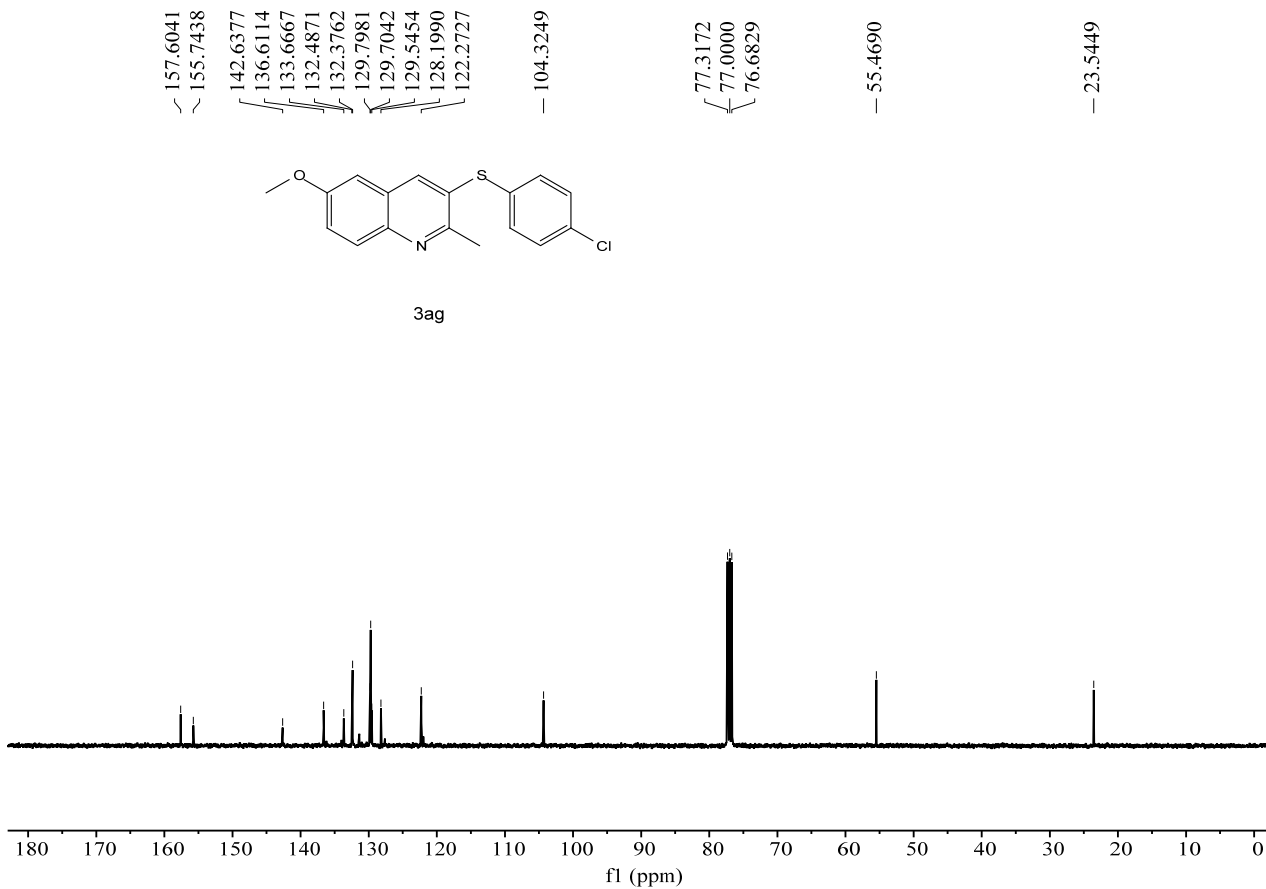

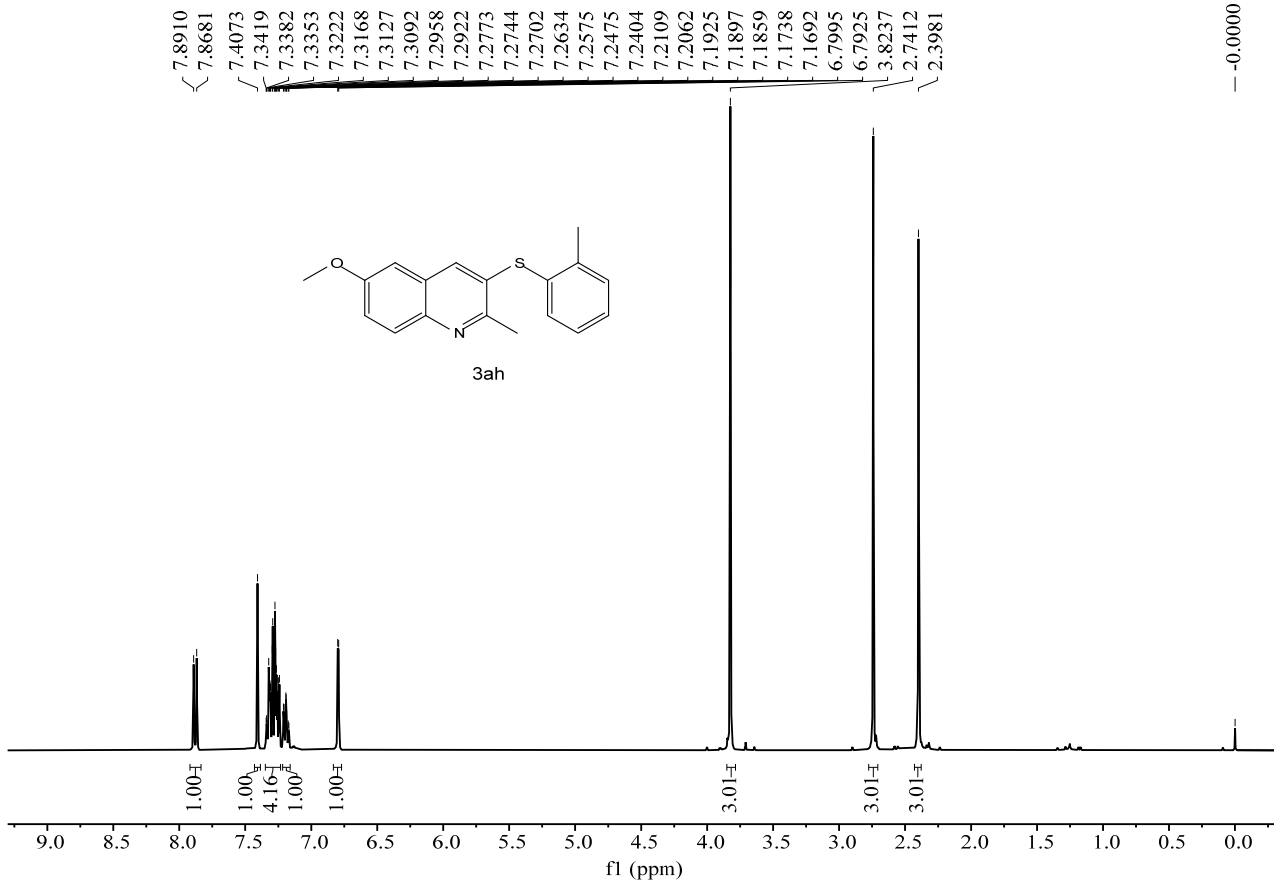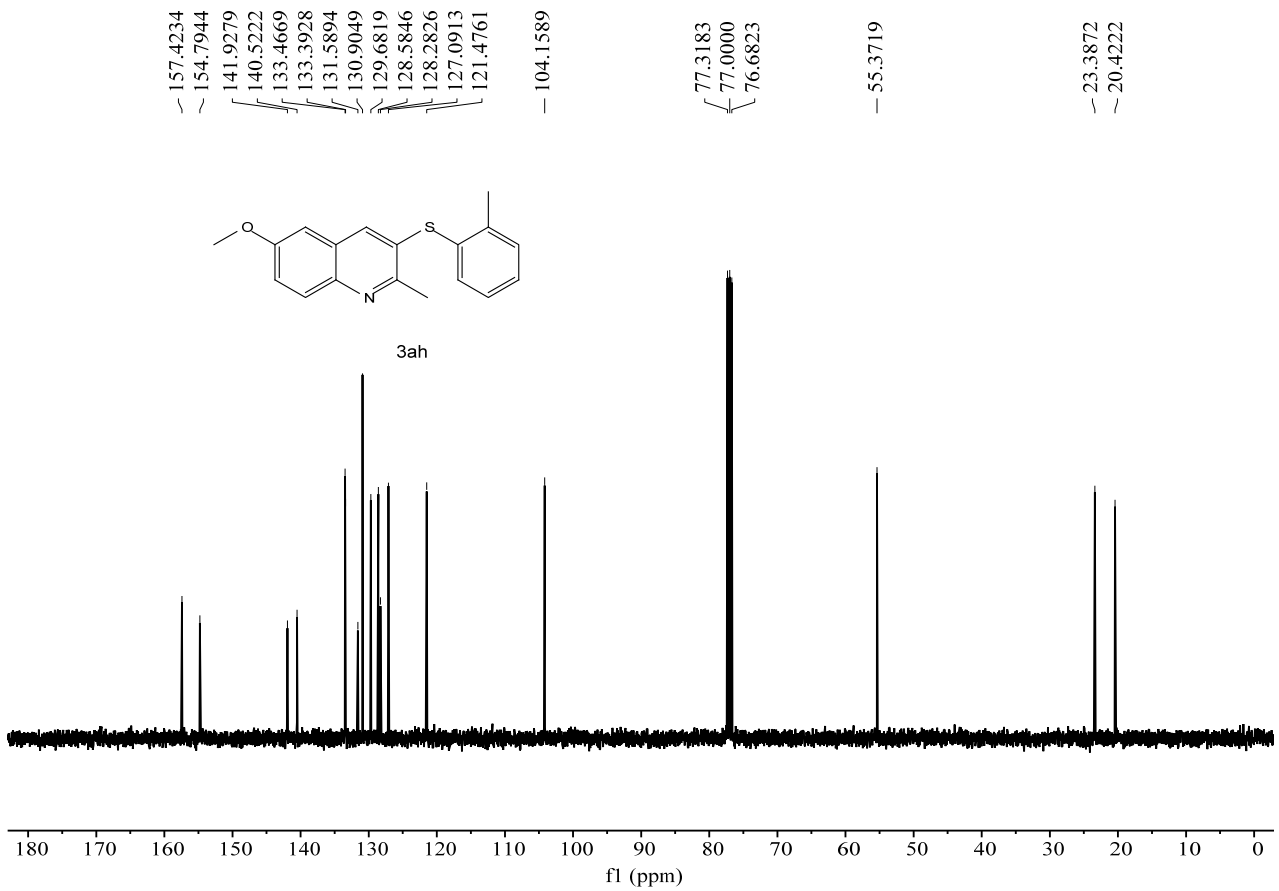

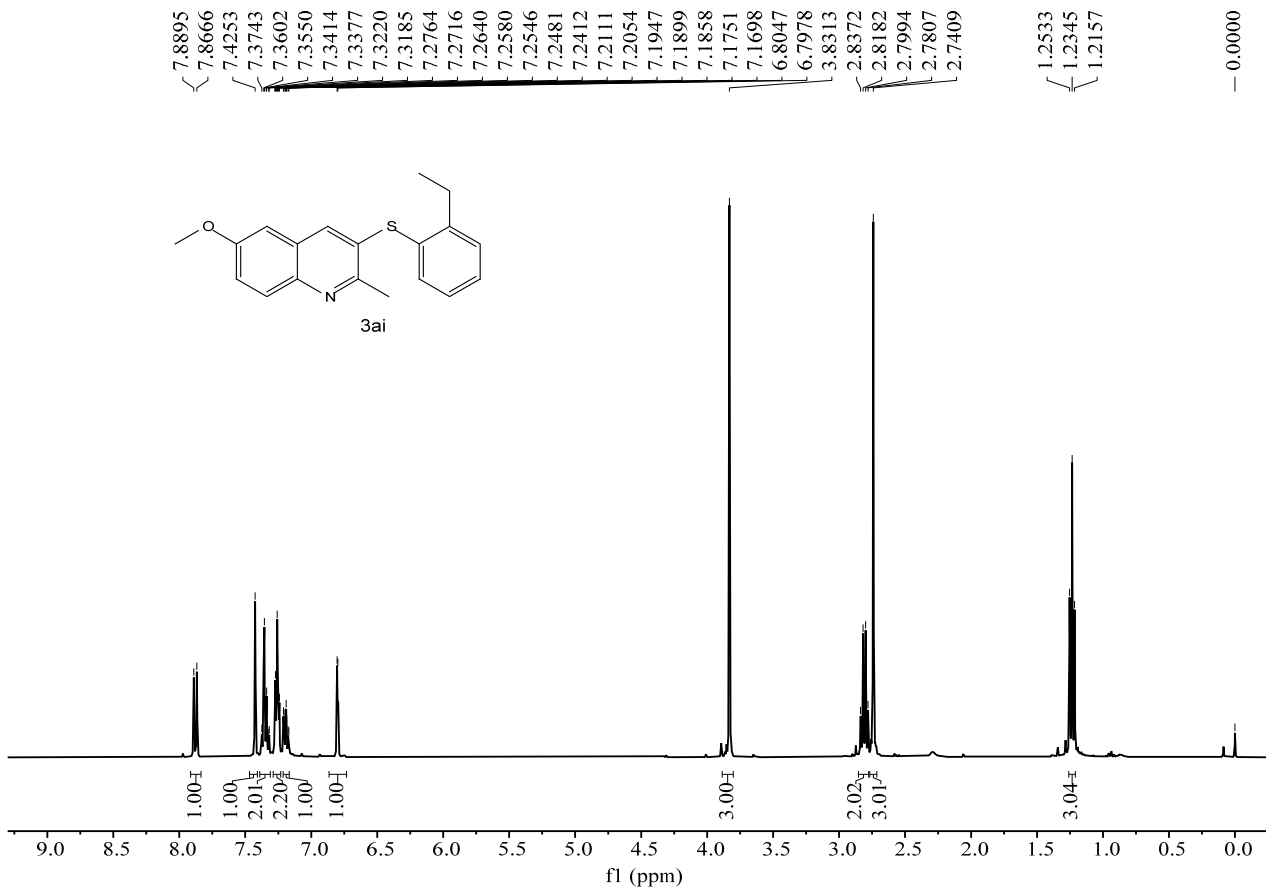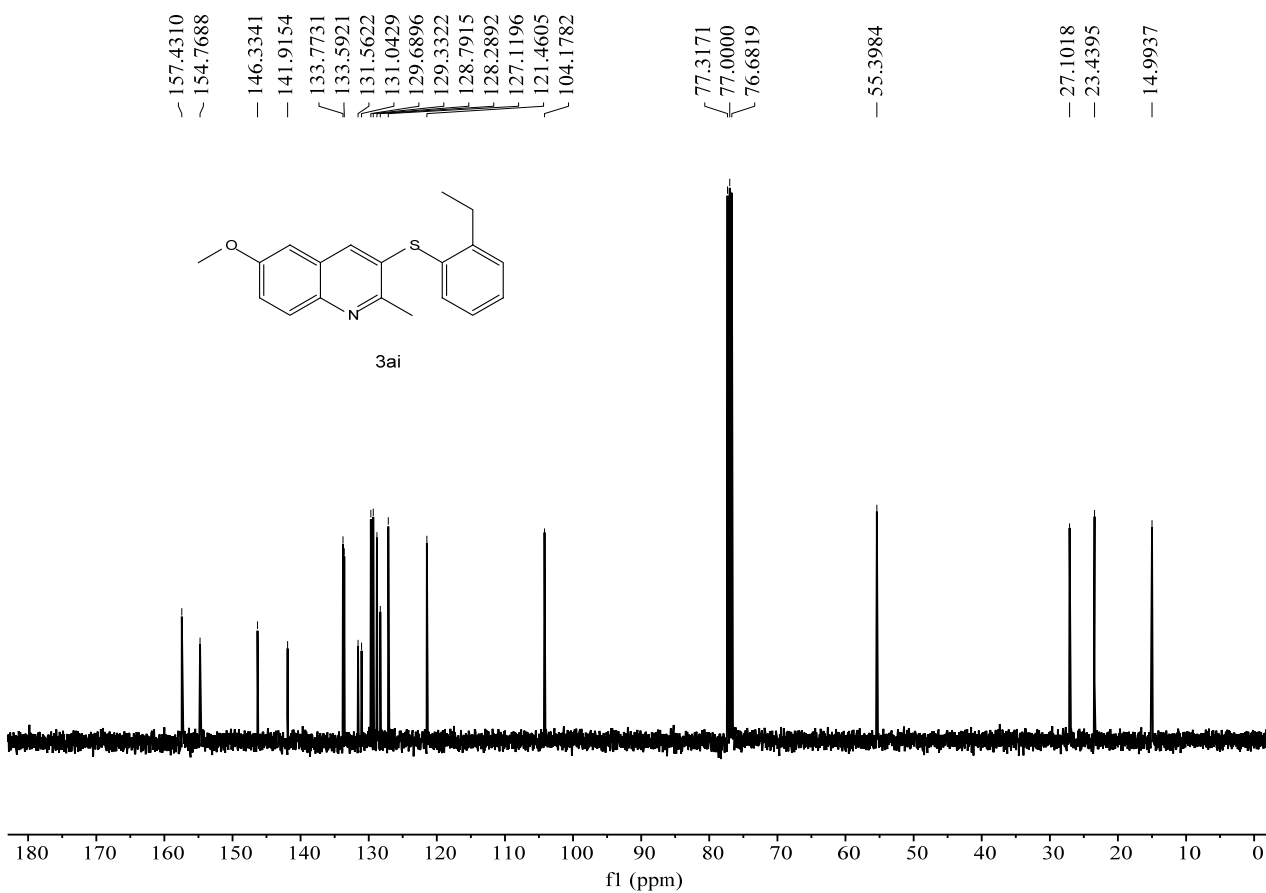



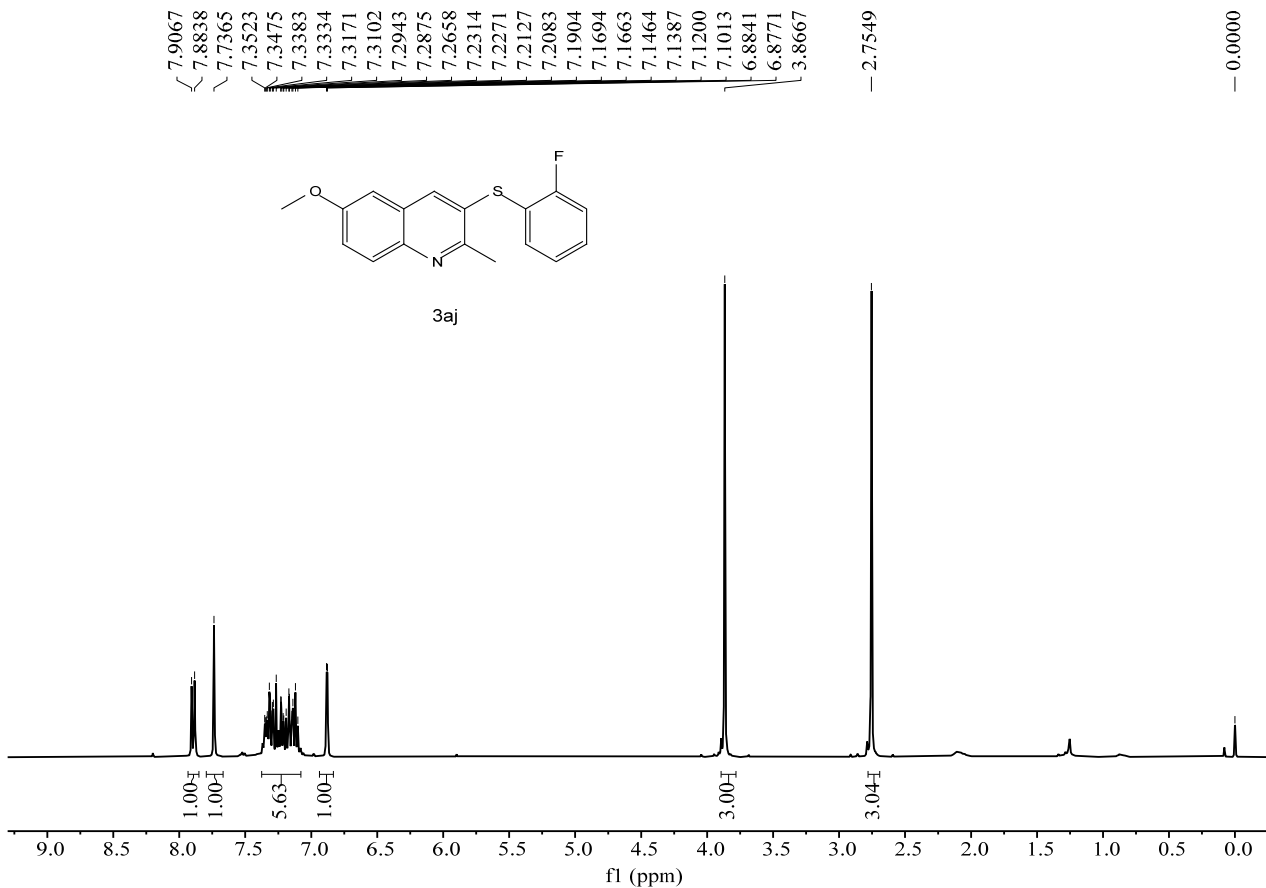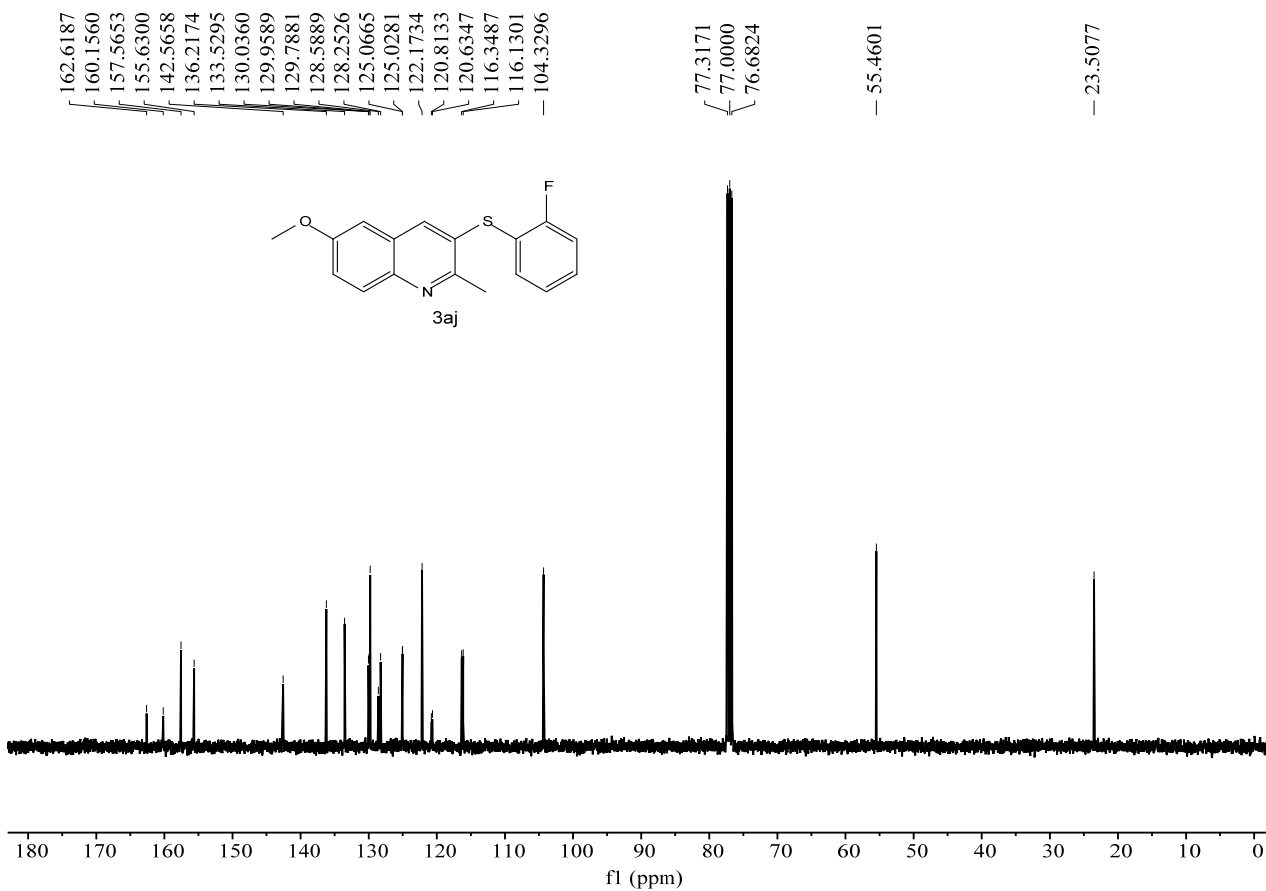

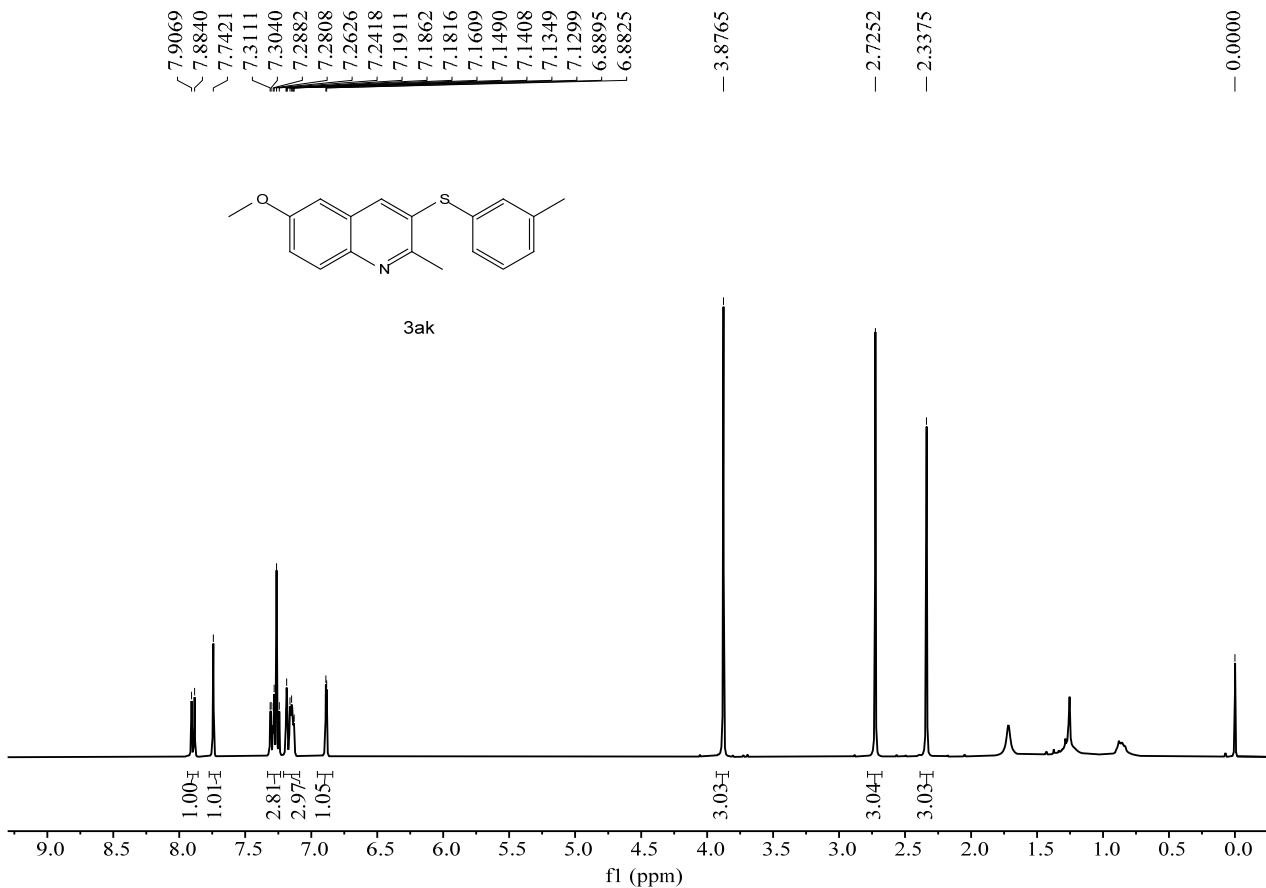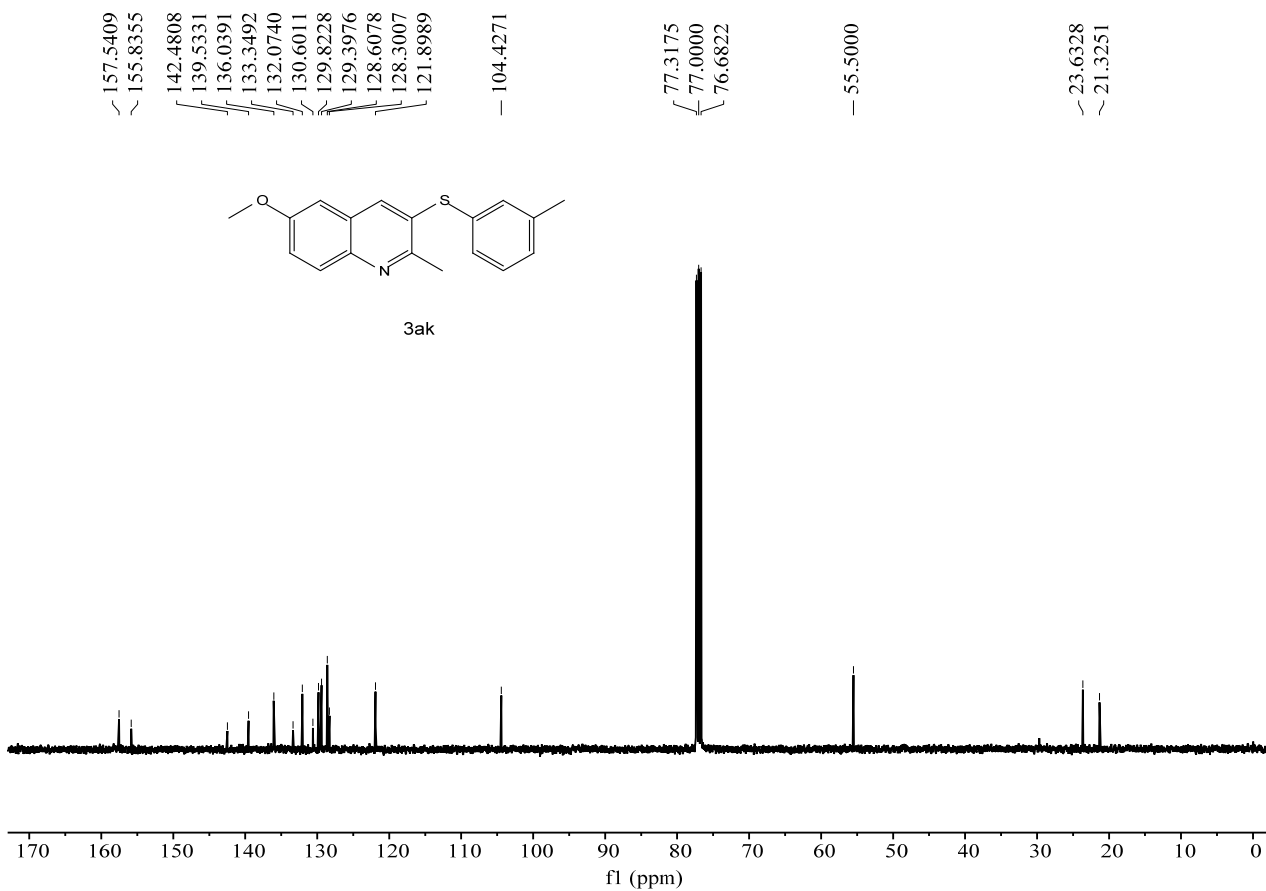

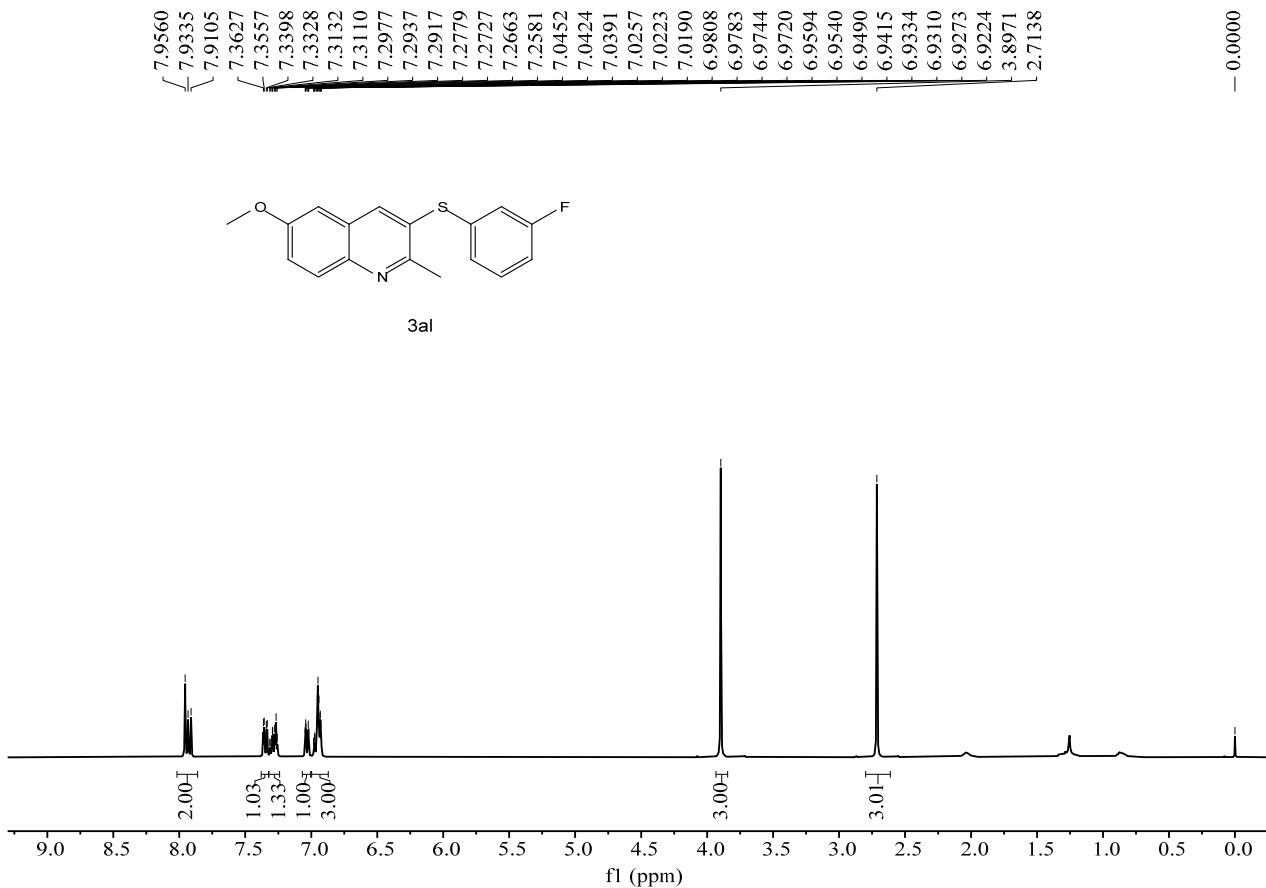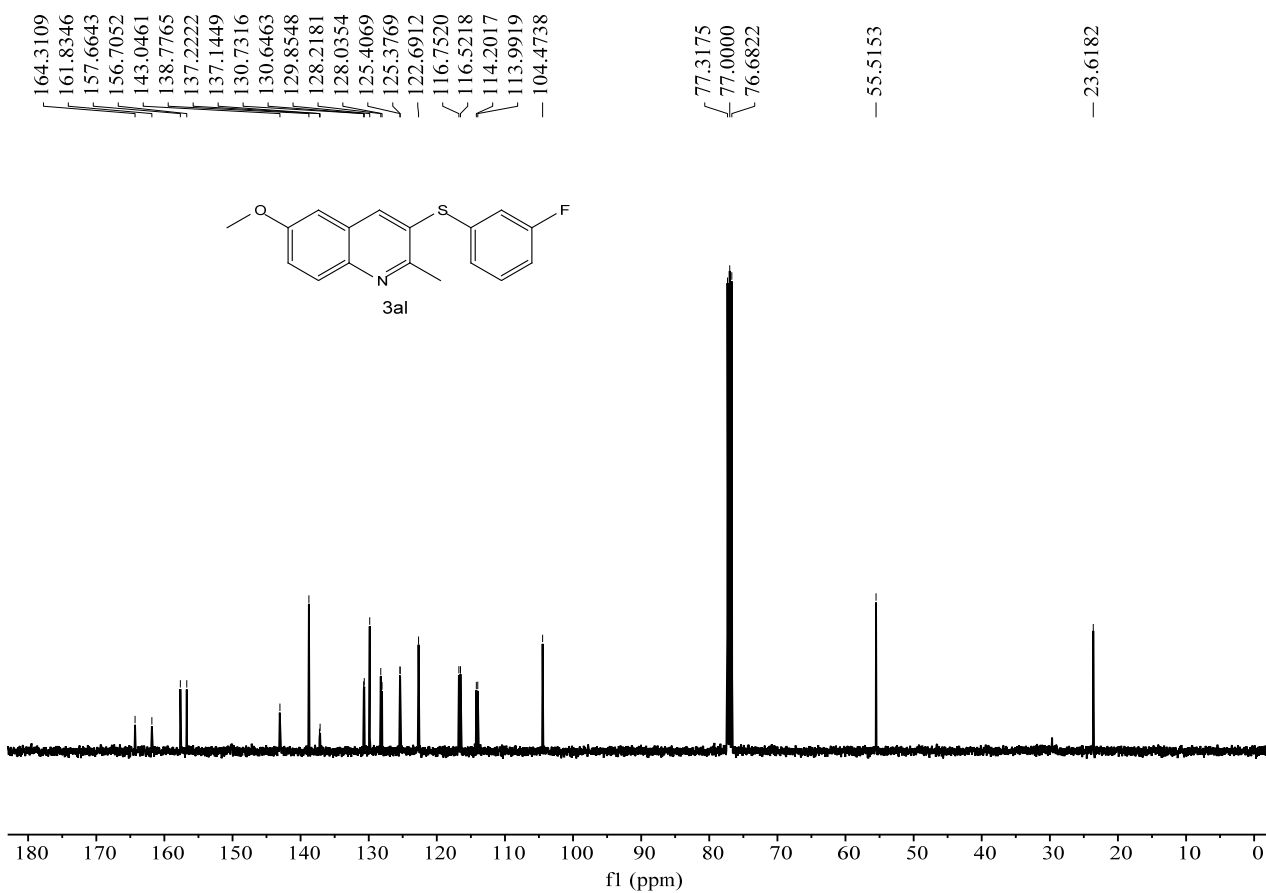

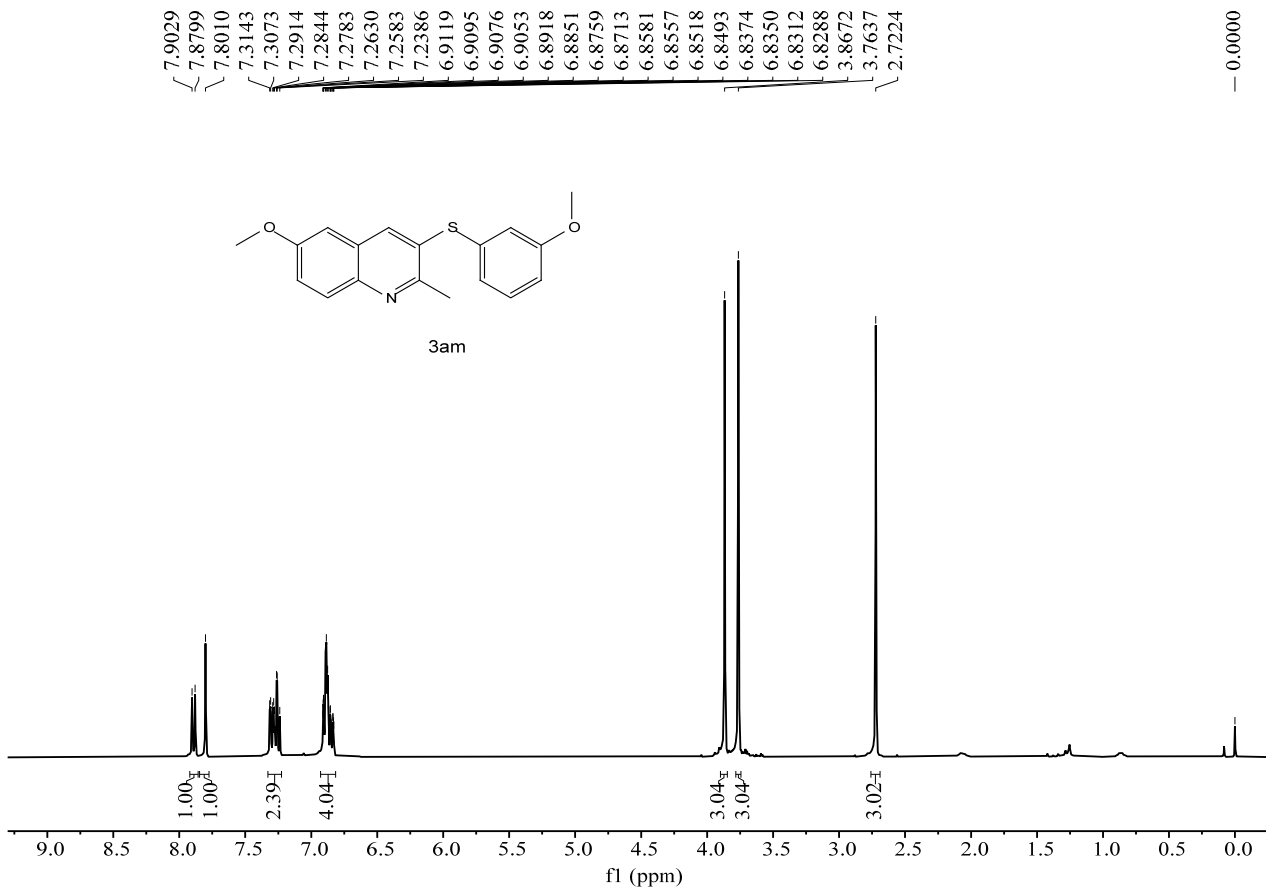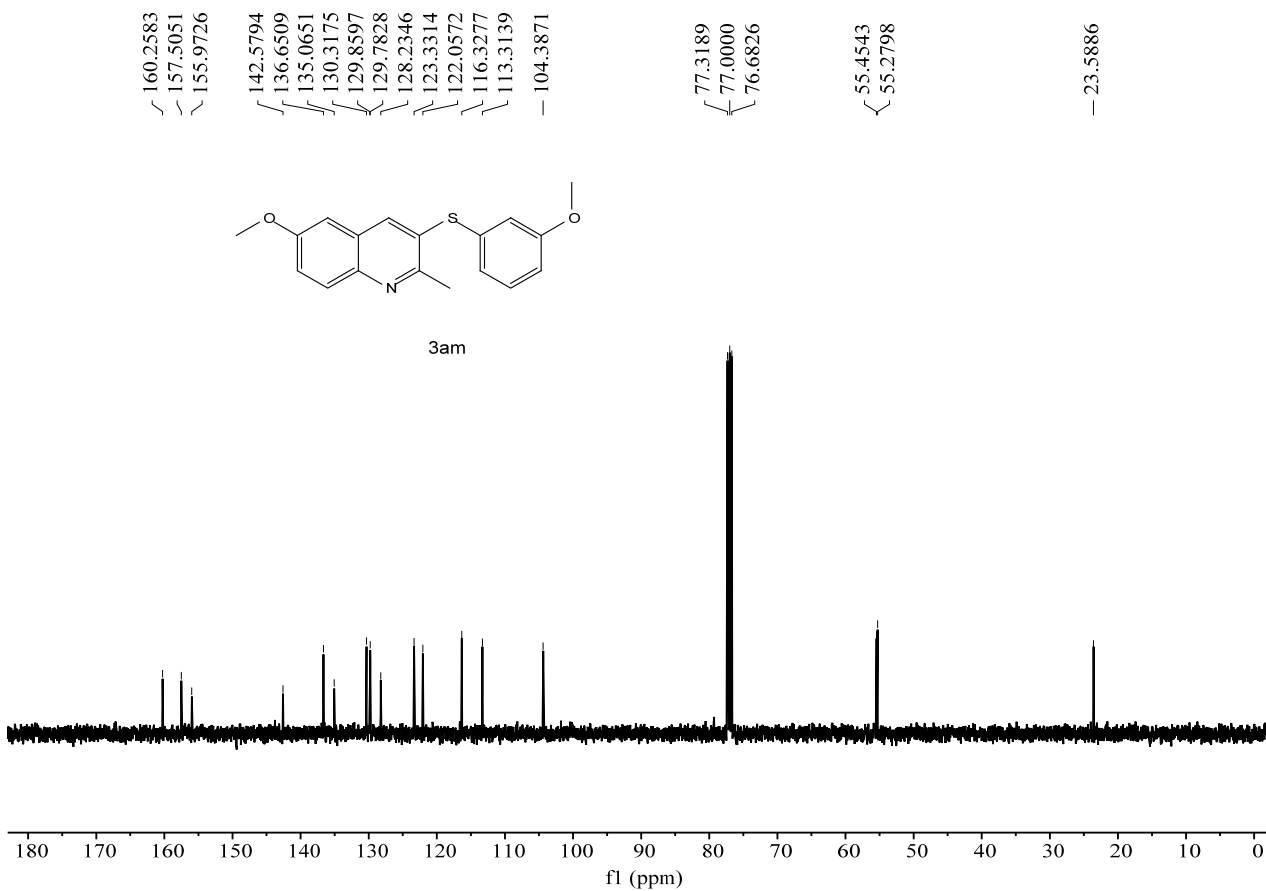

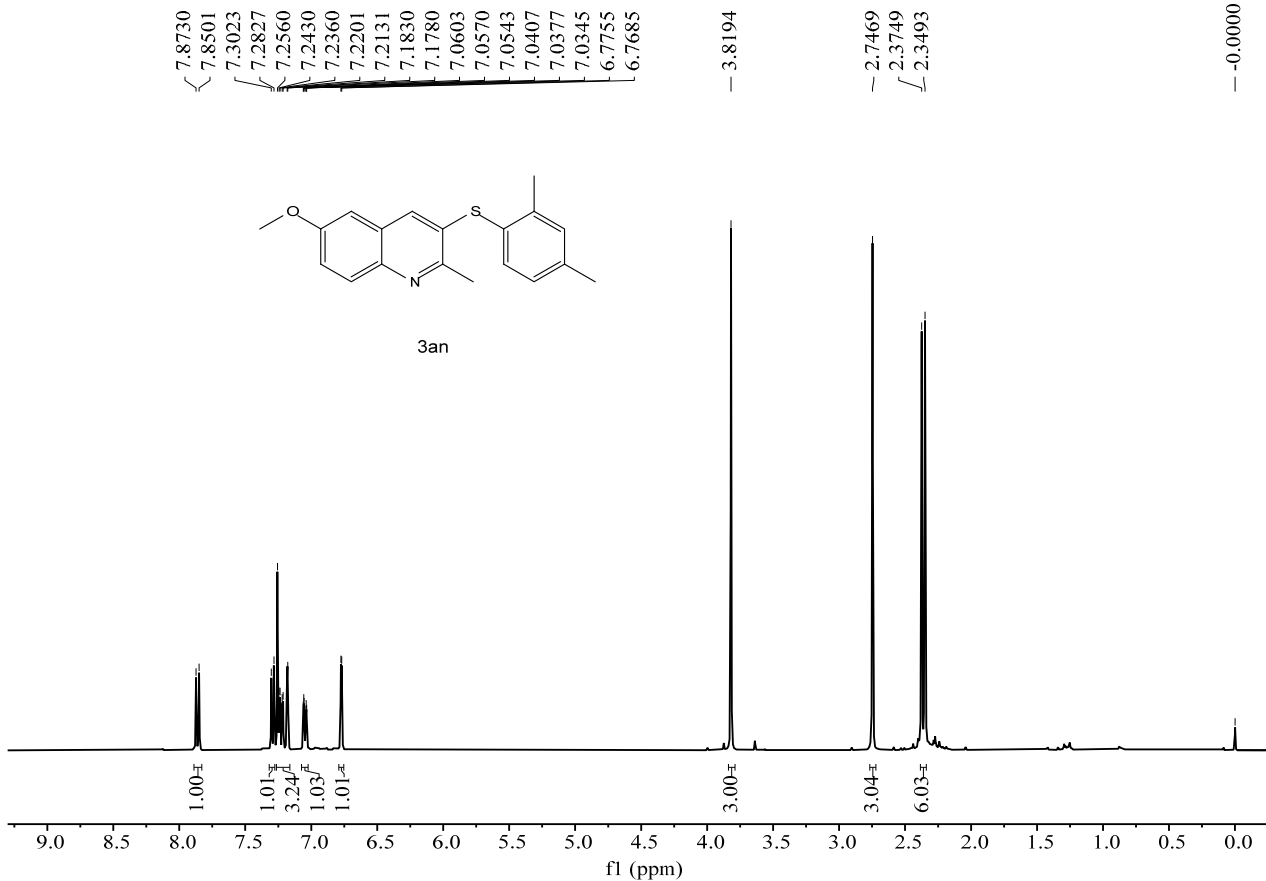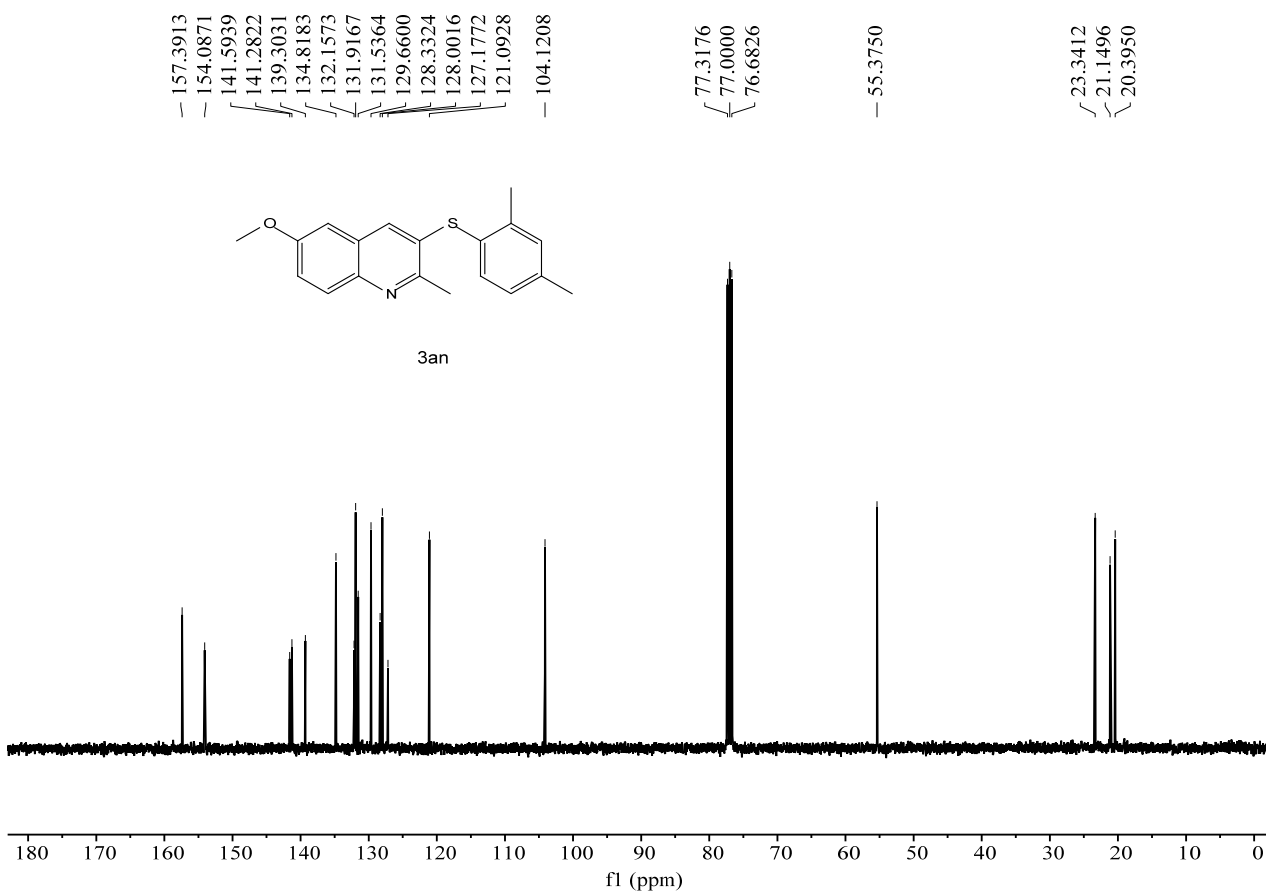

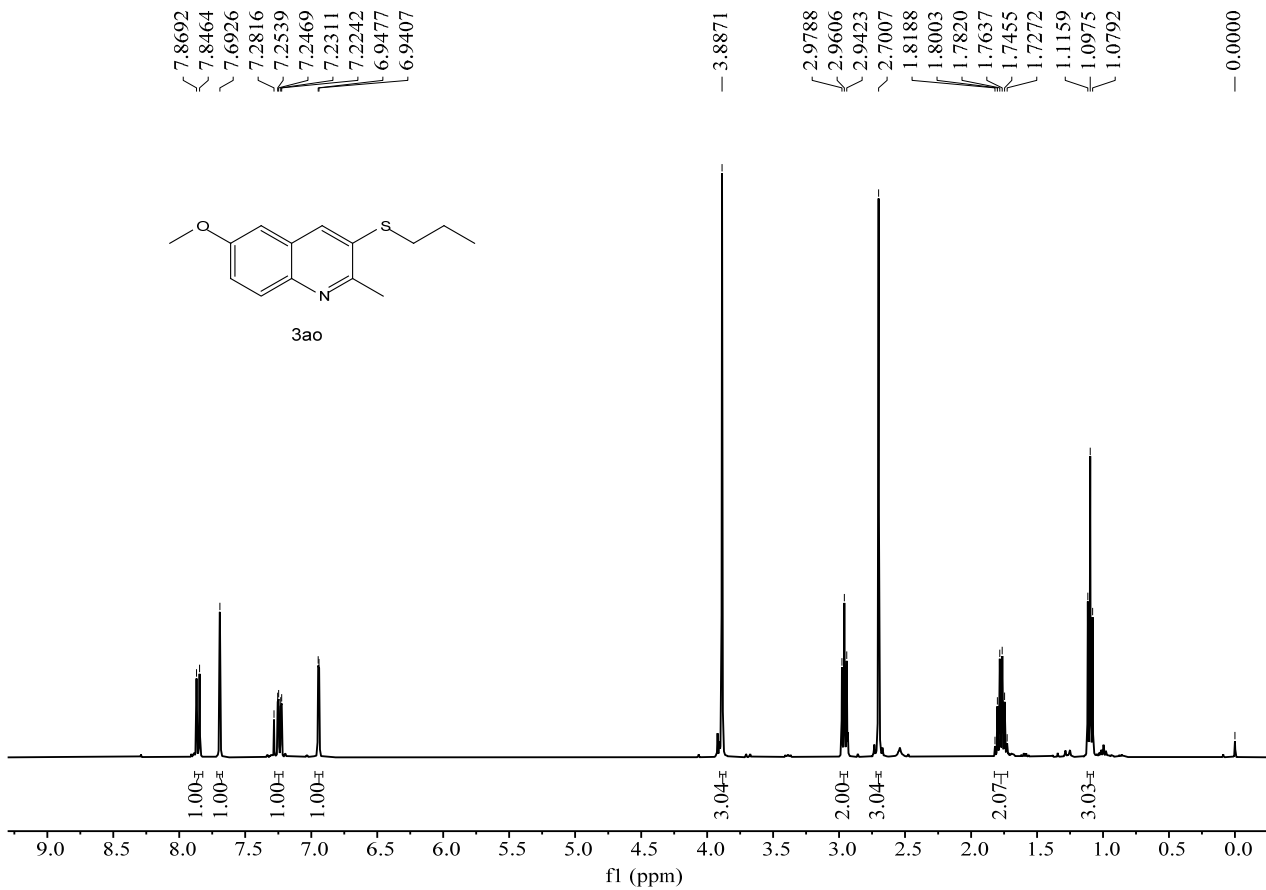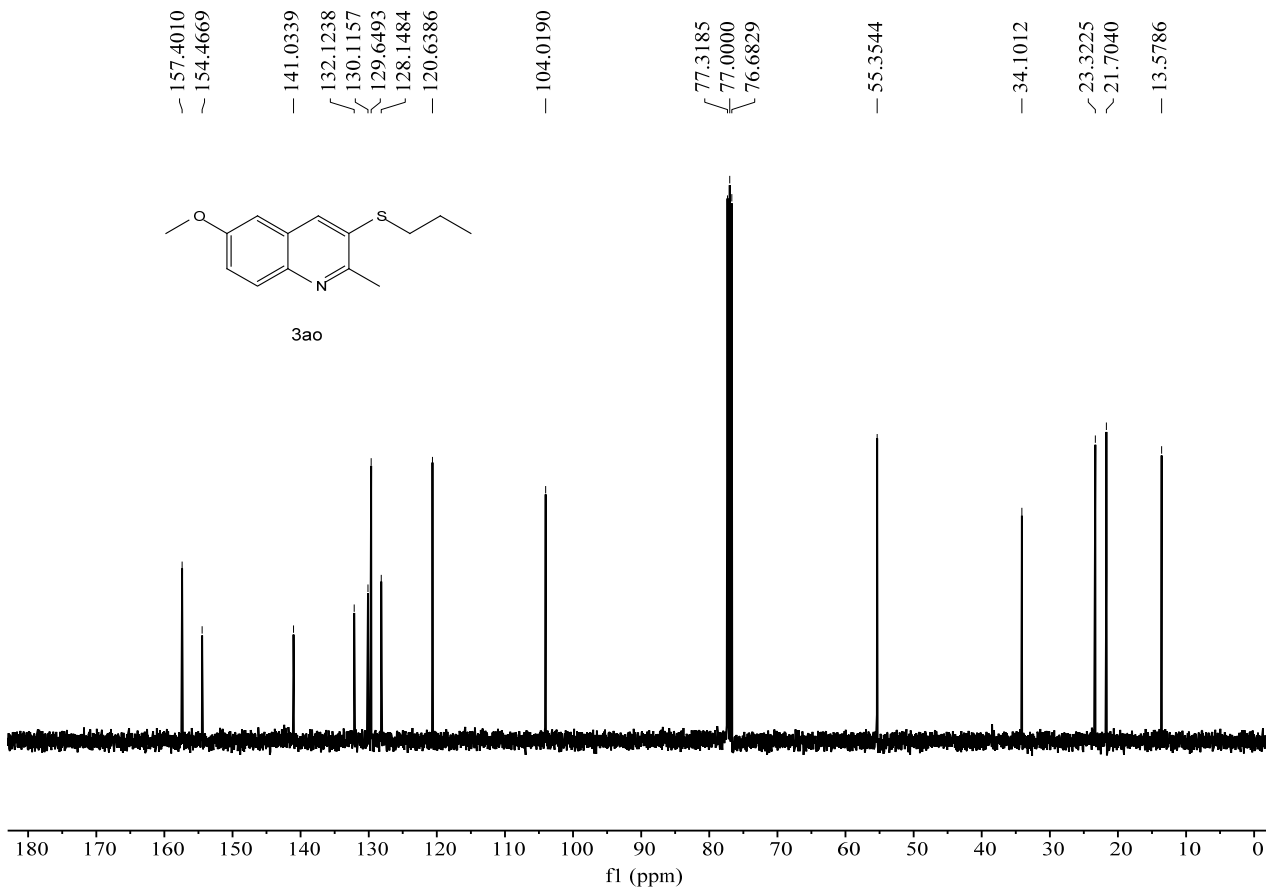

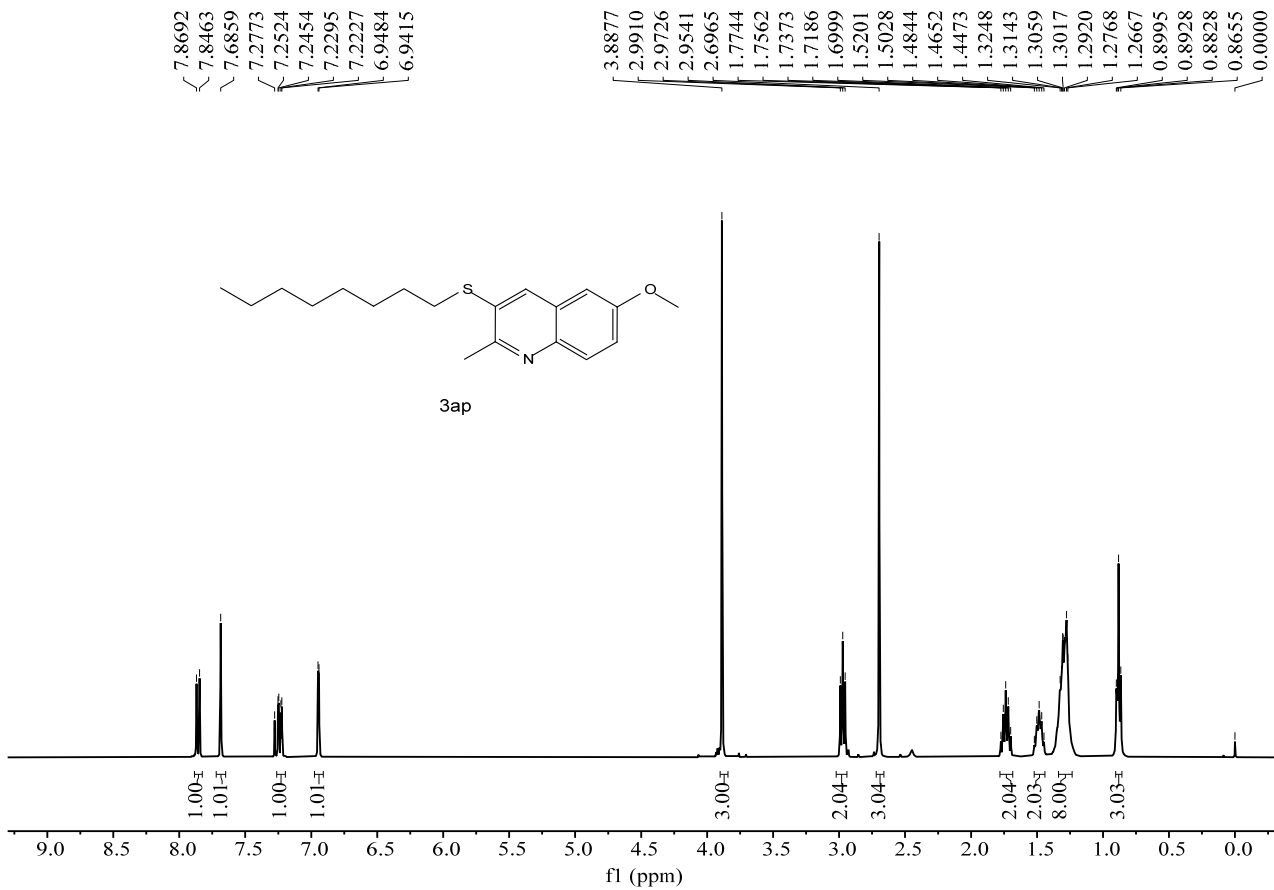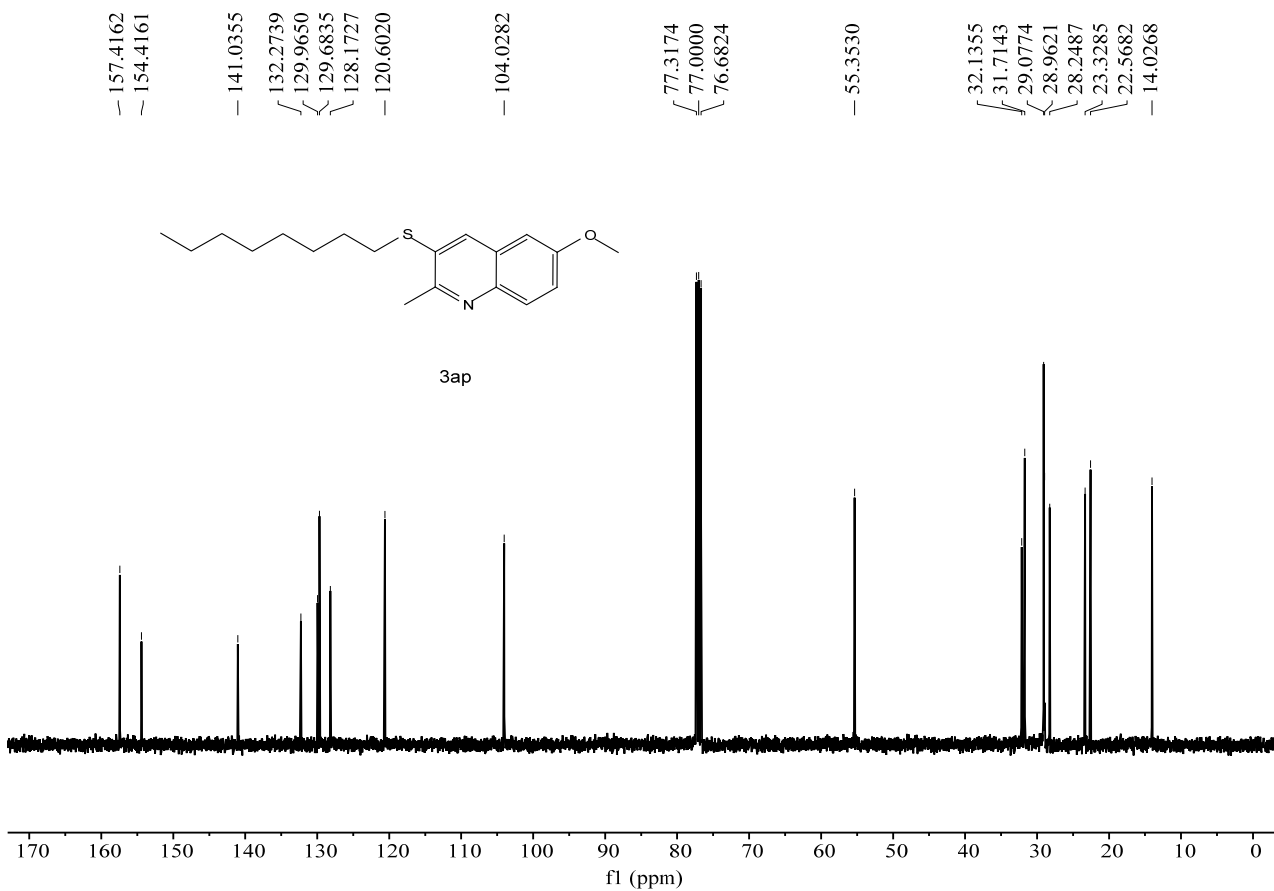

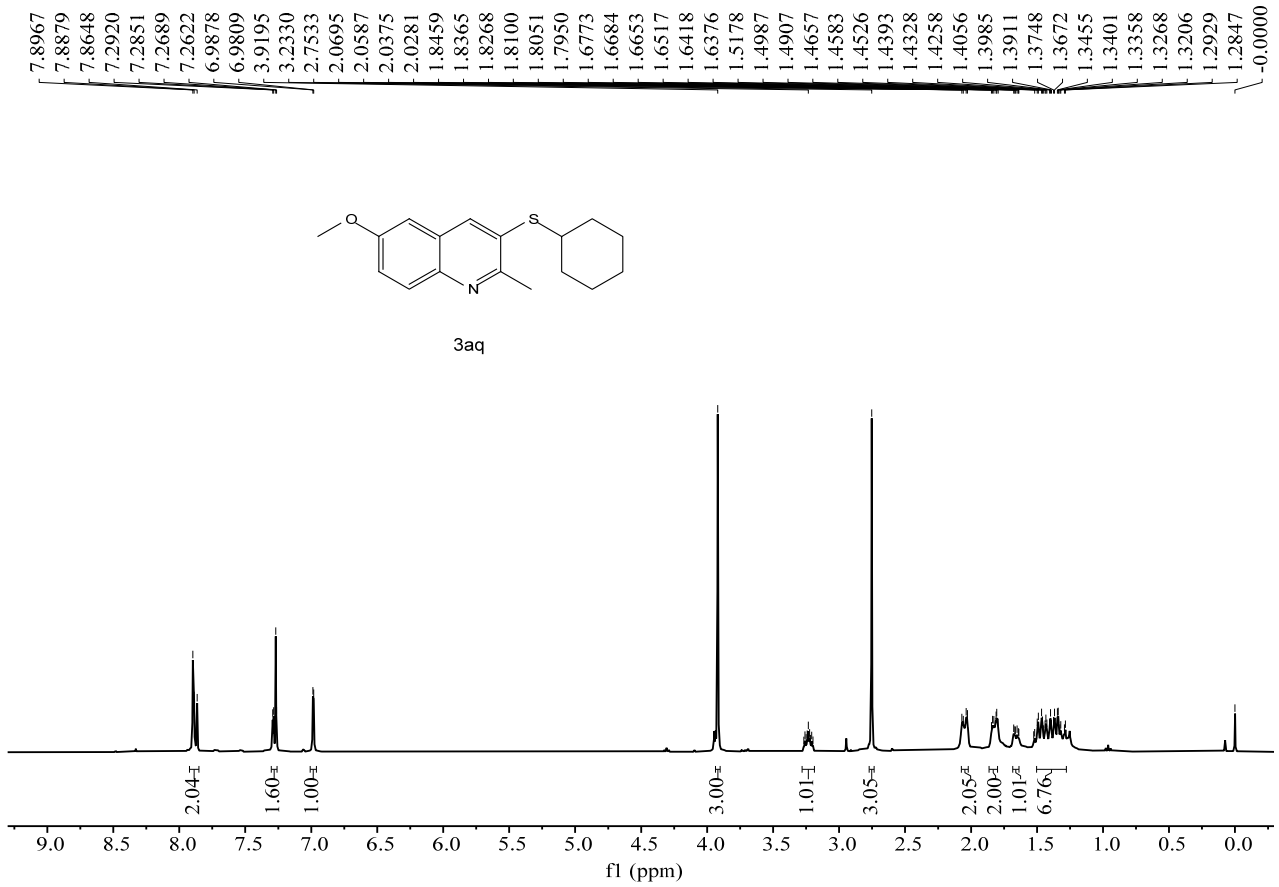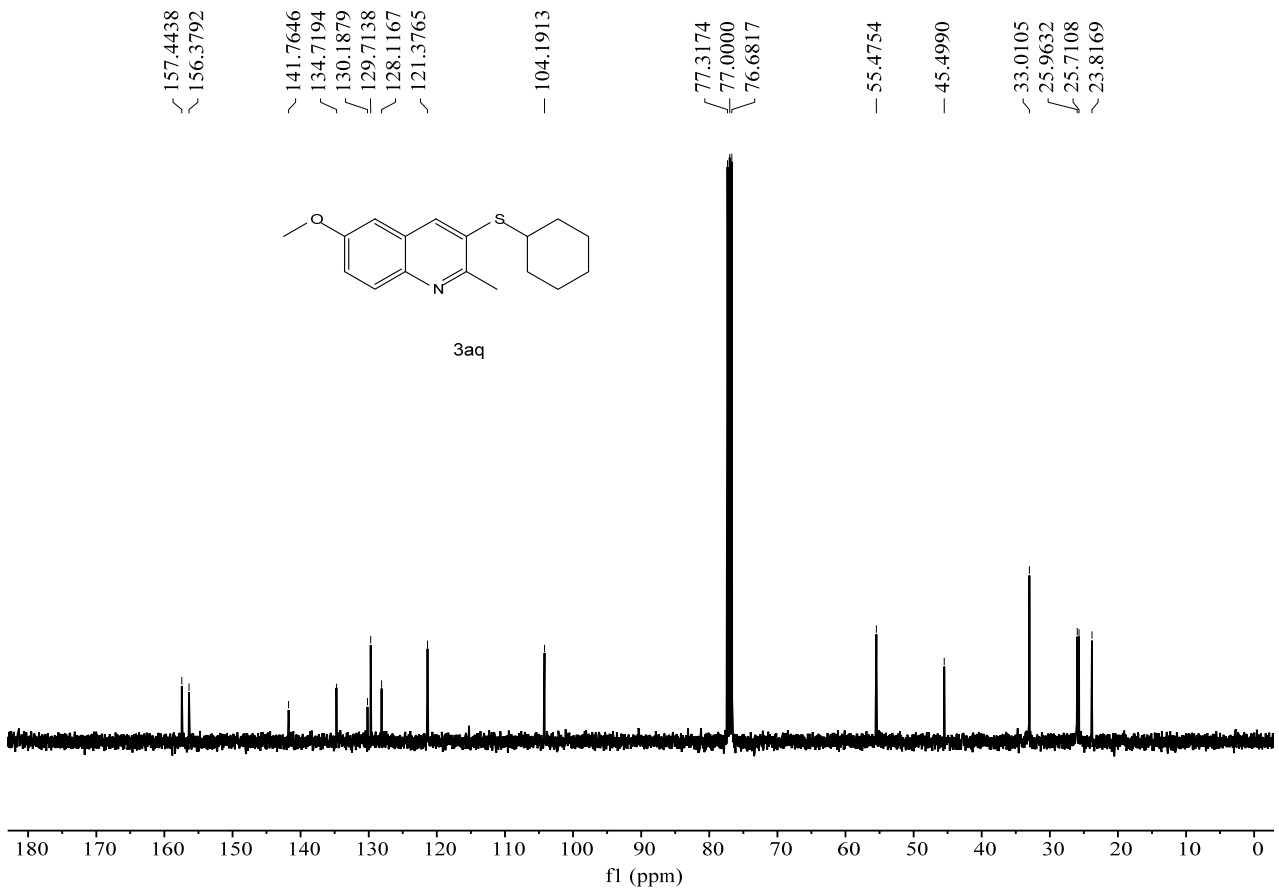



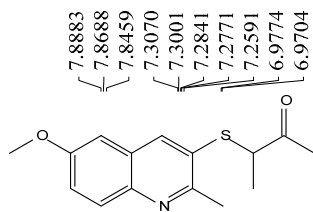

3ar

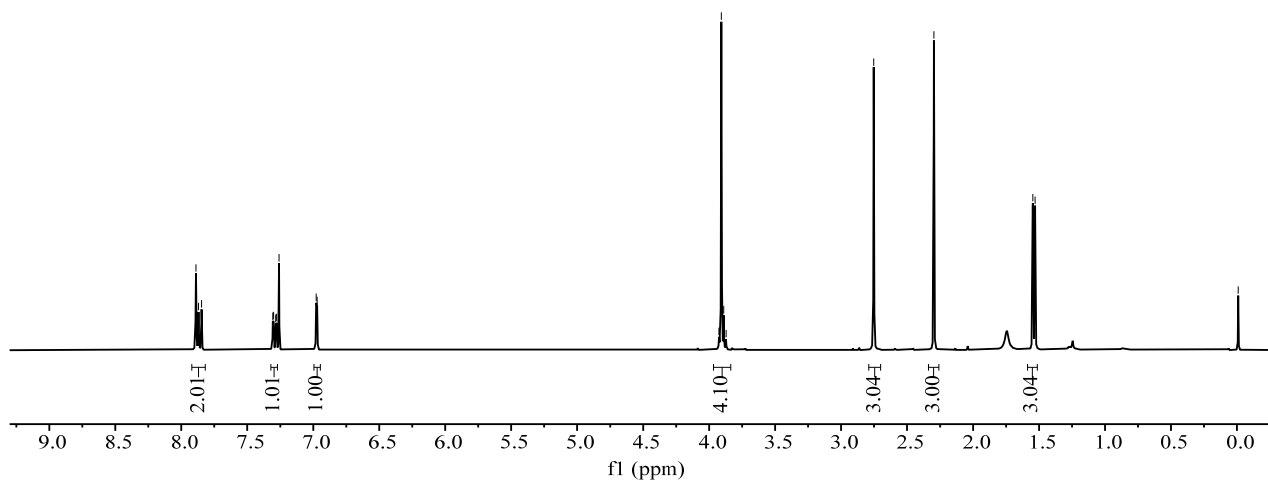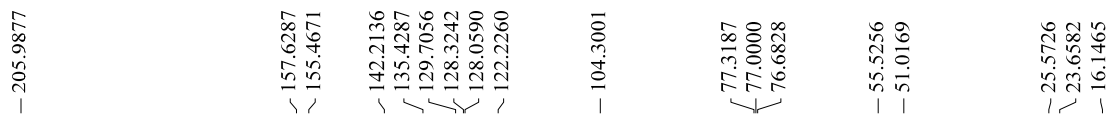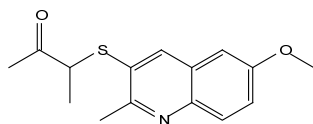

3ar

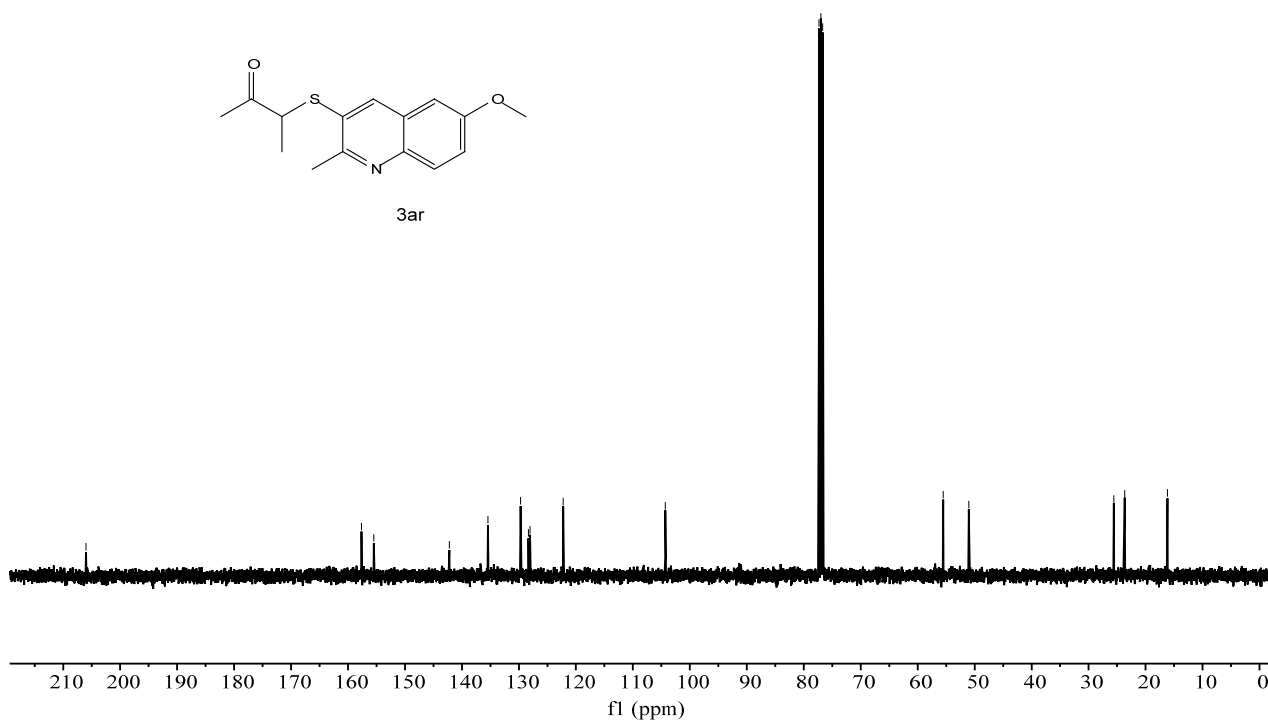

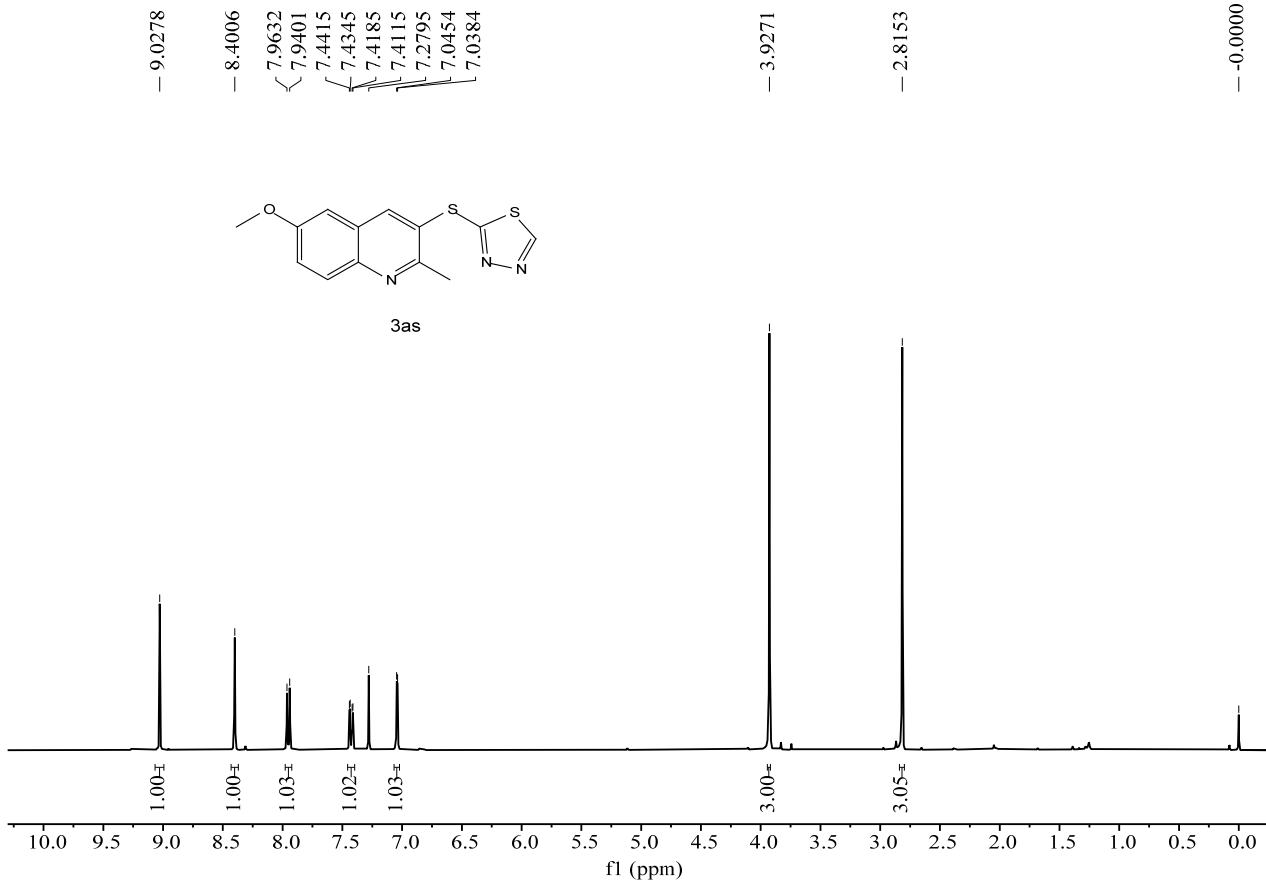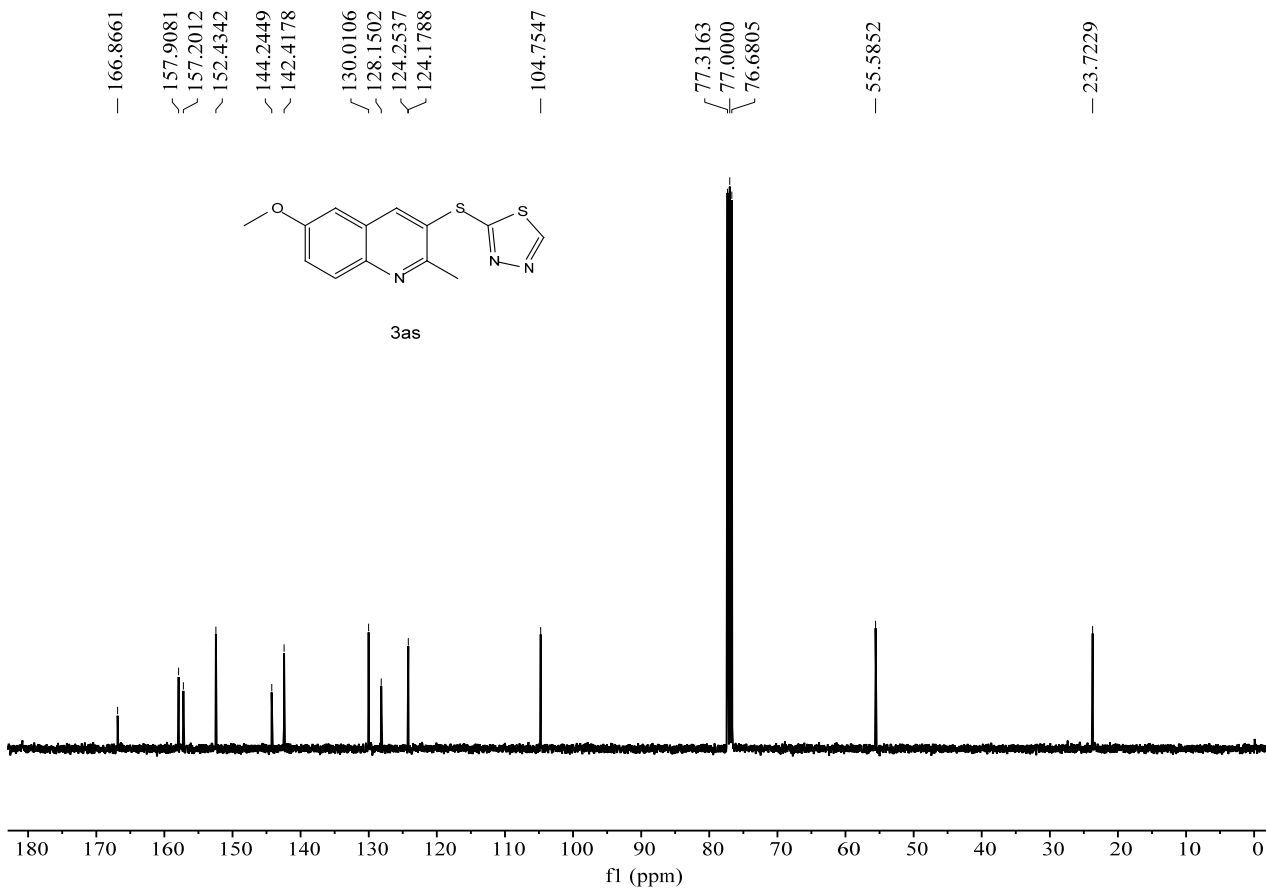

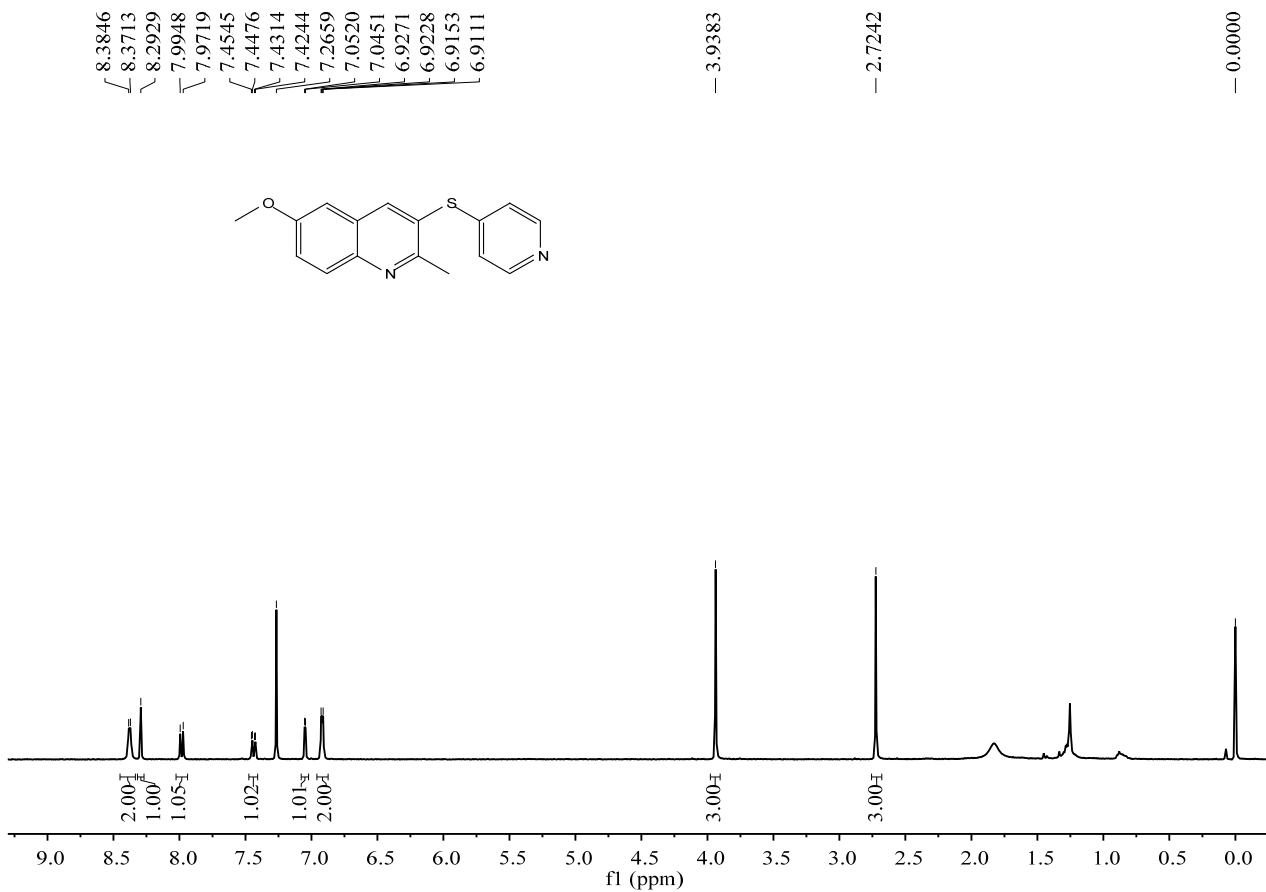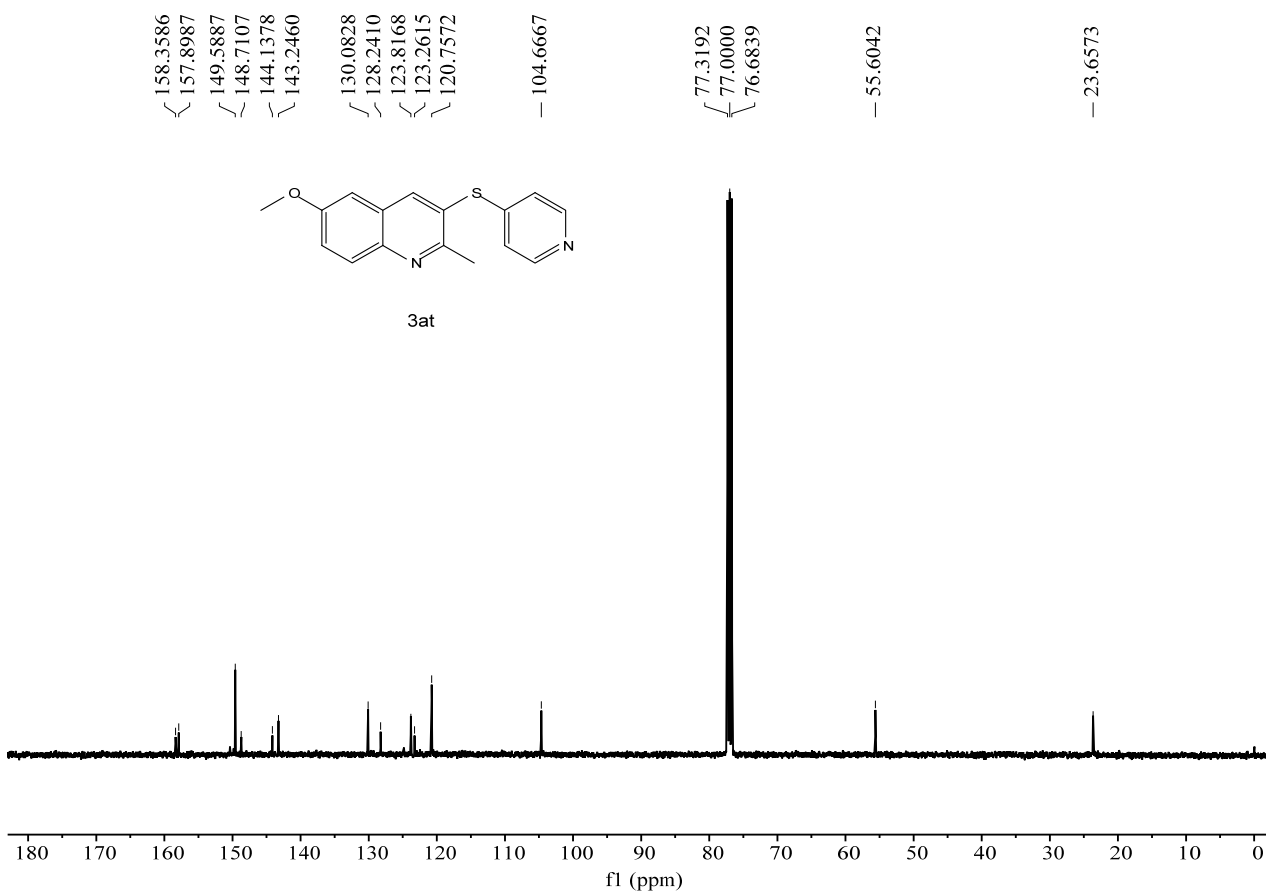

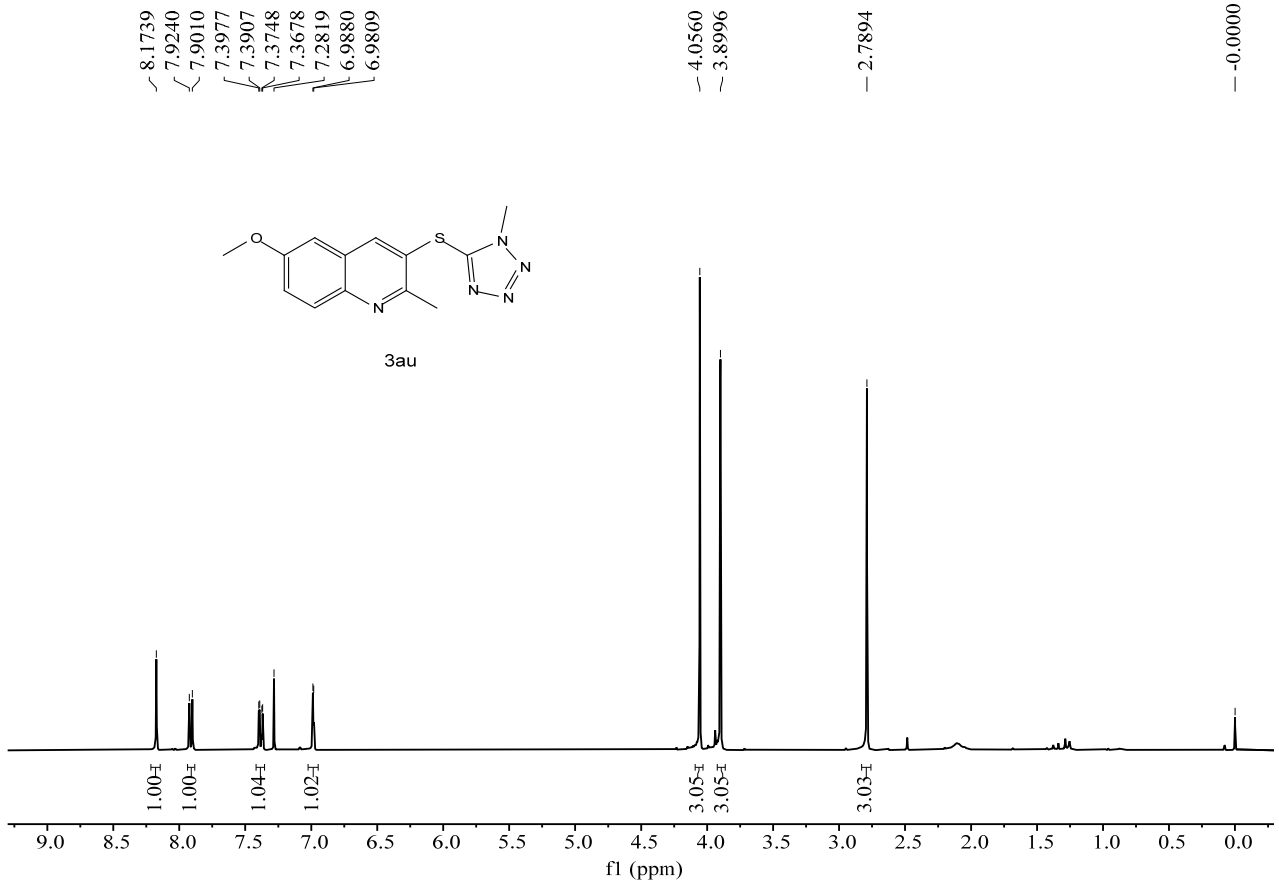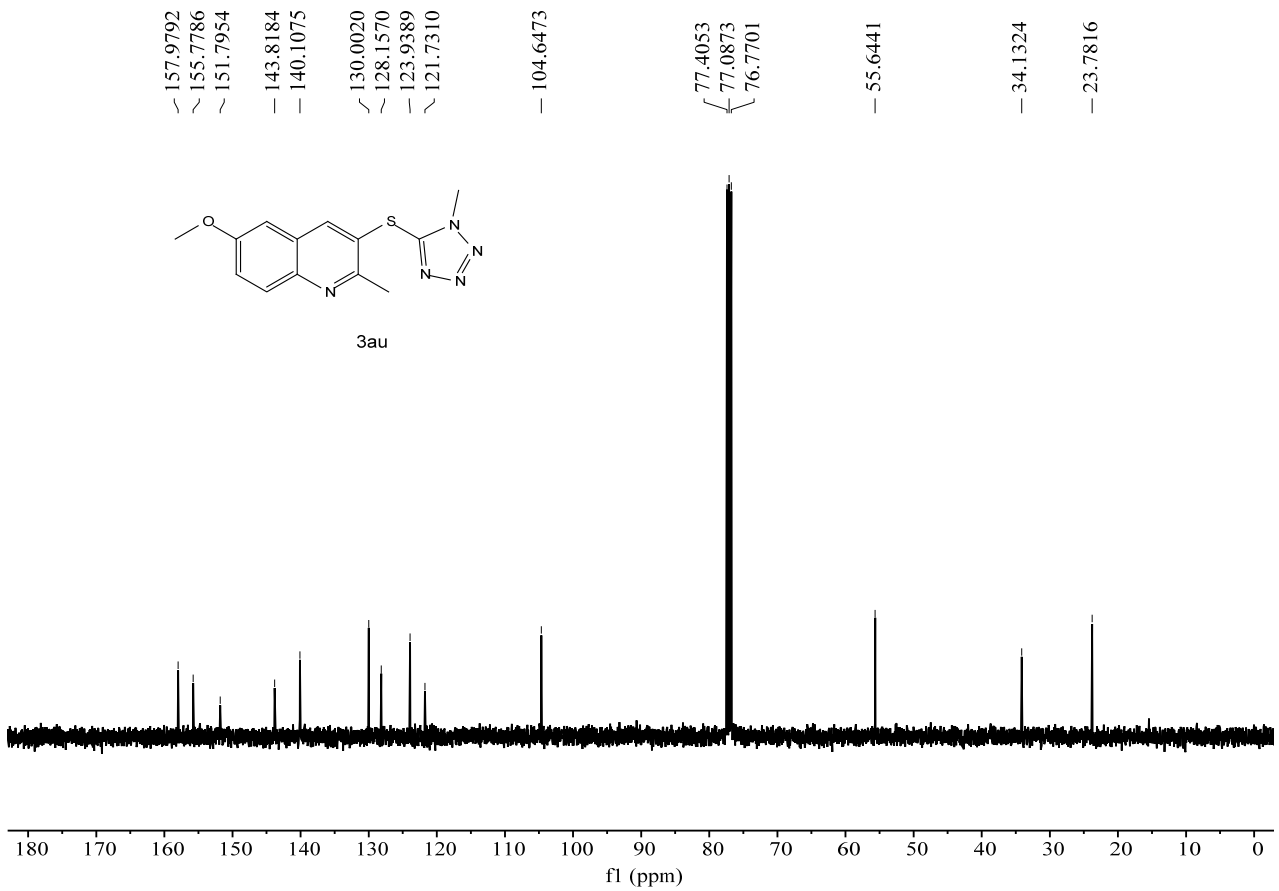

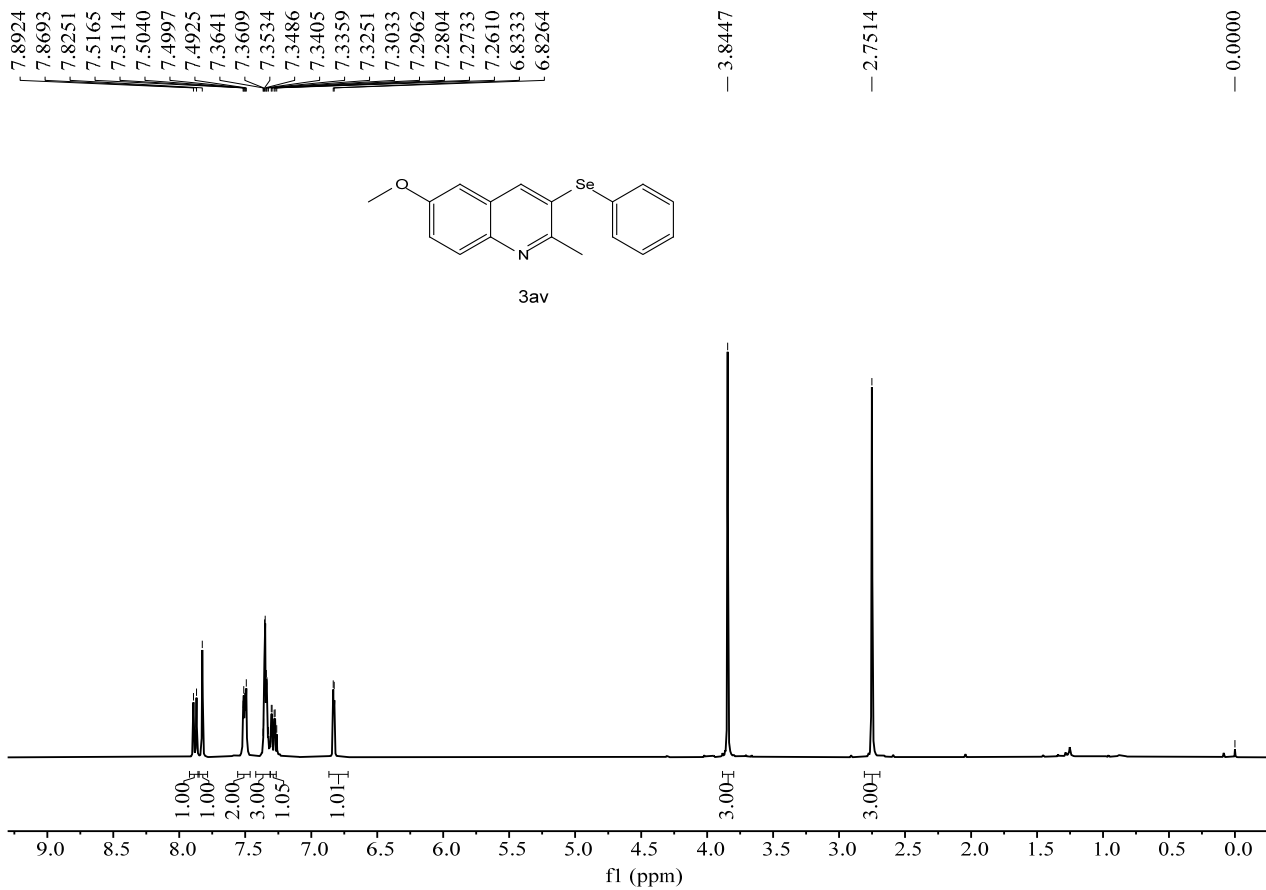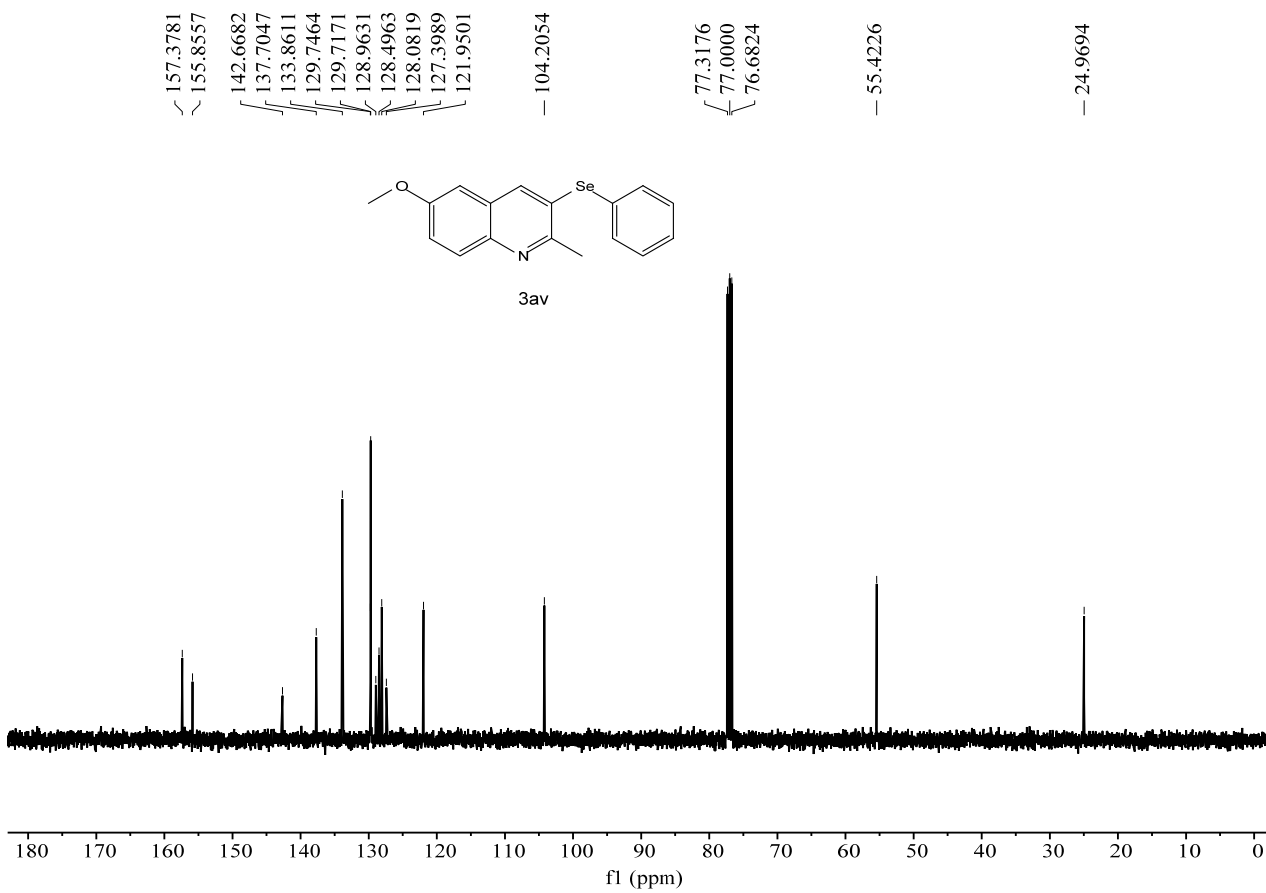

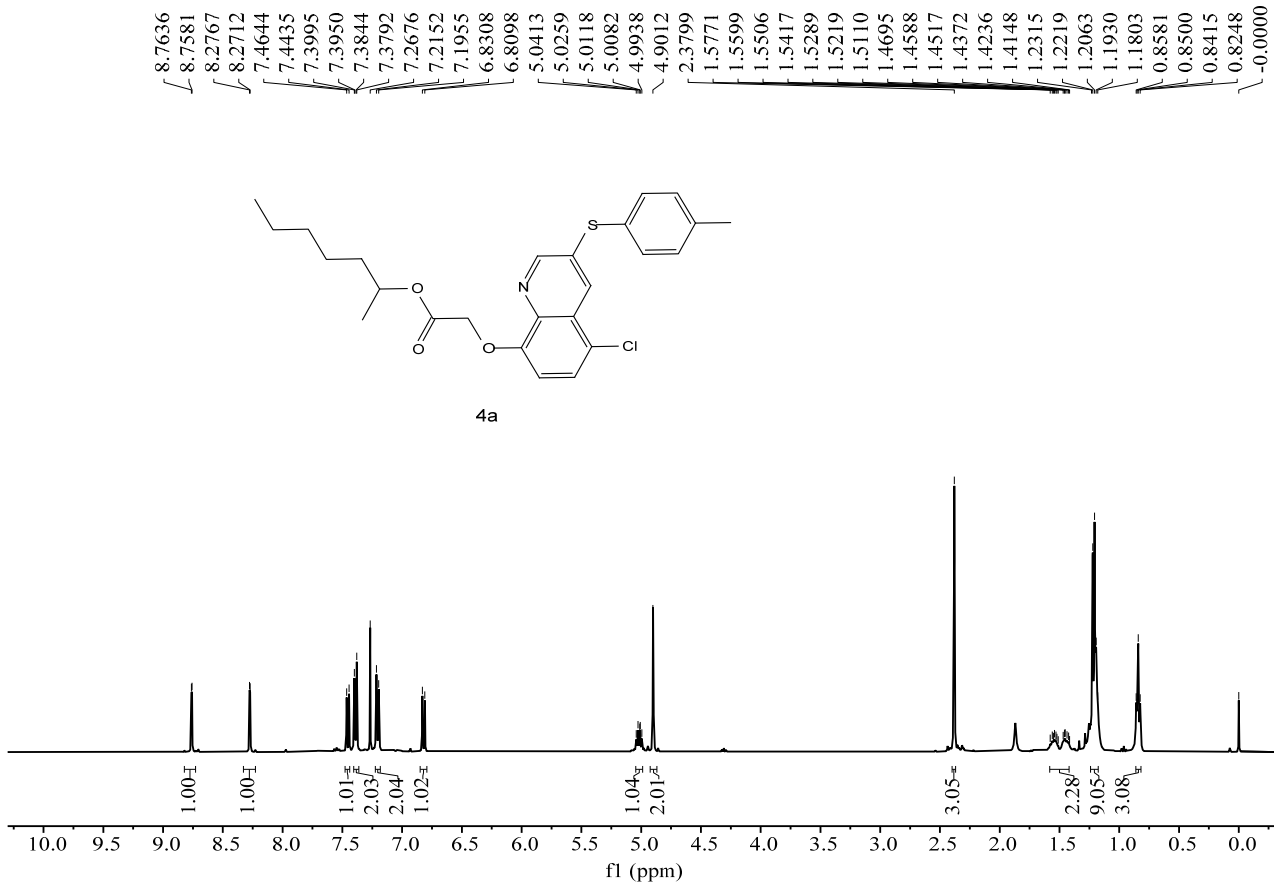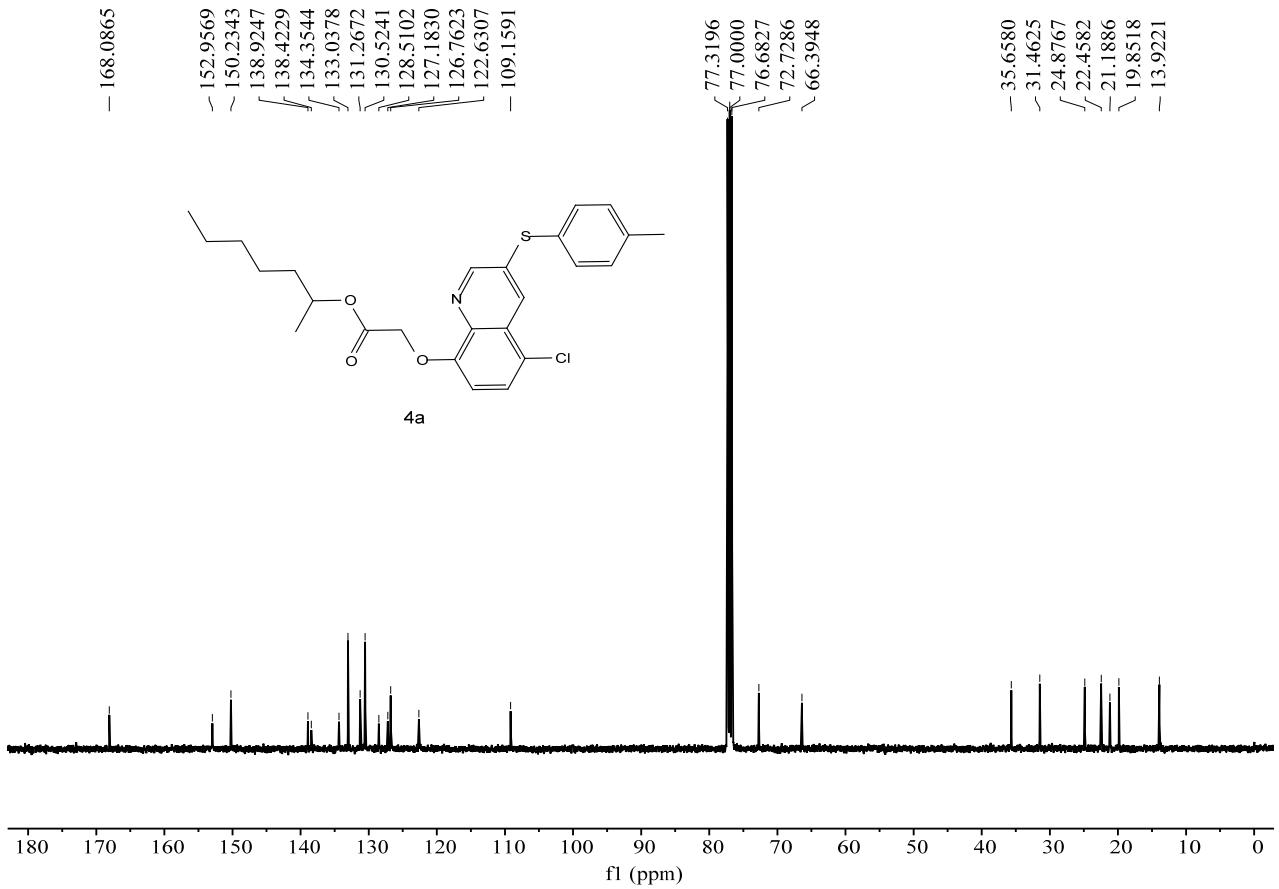

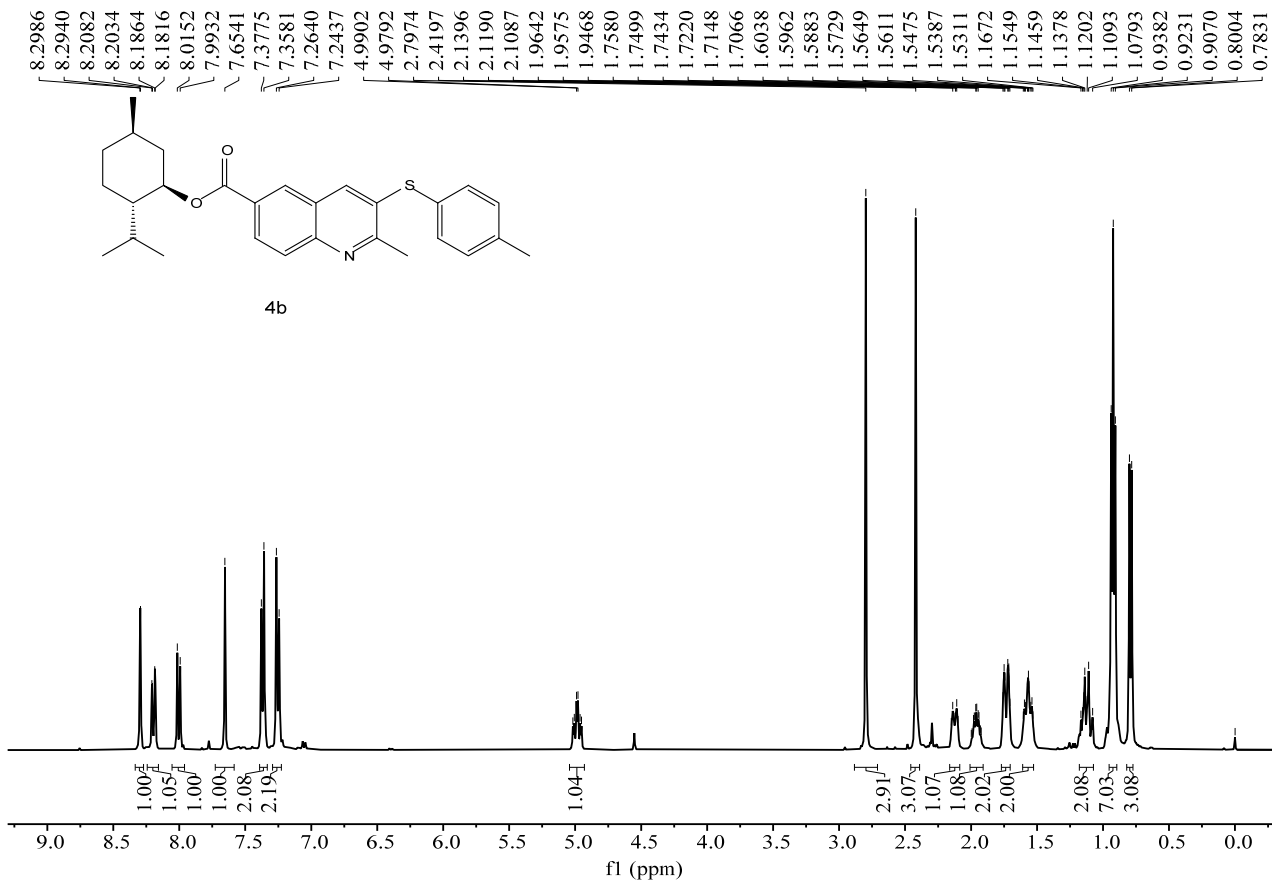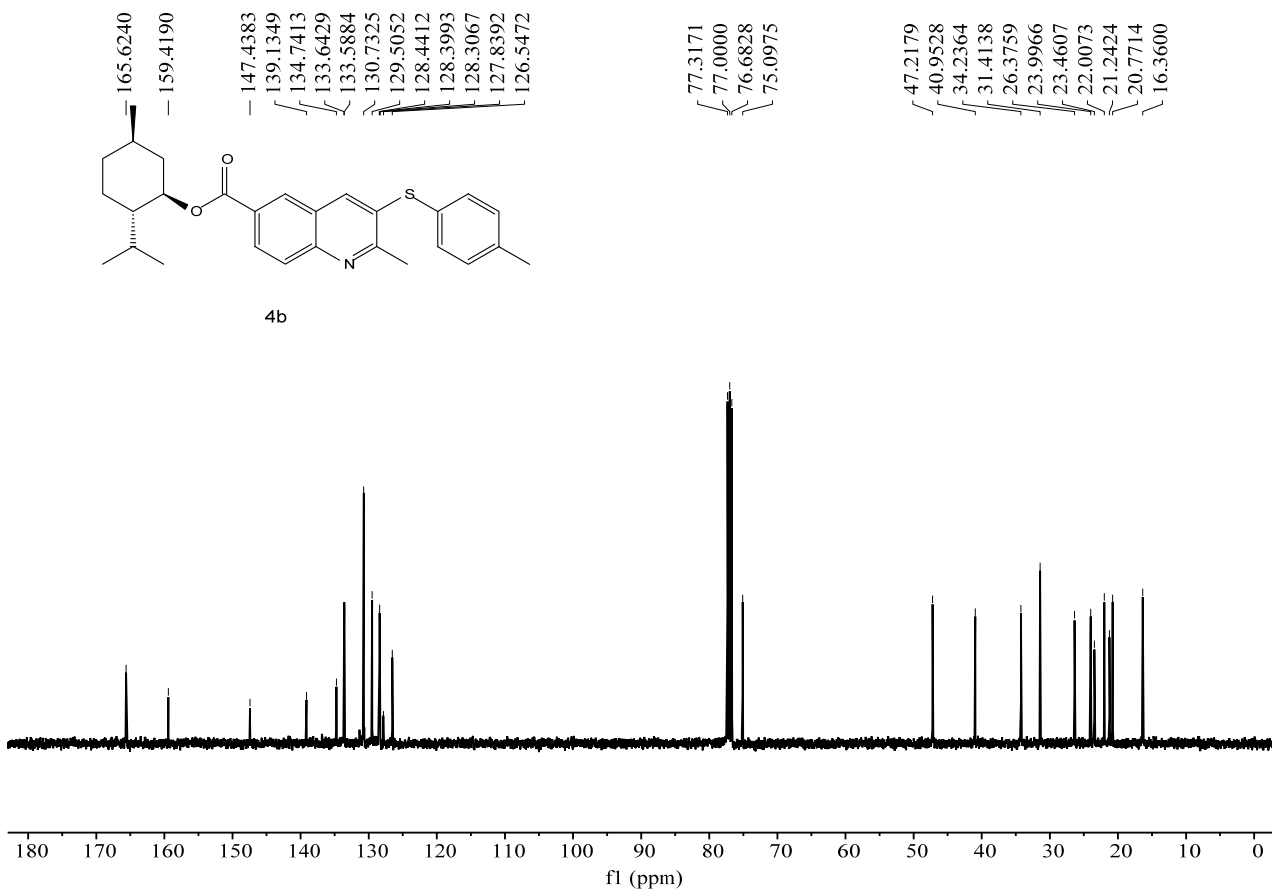

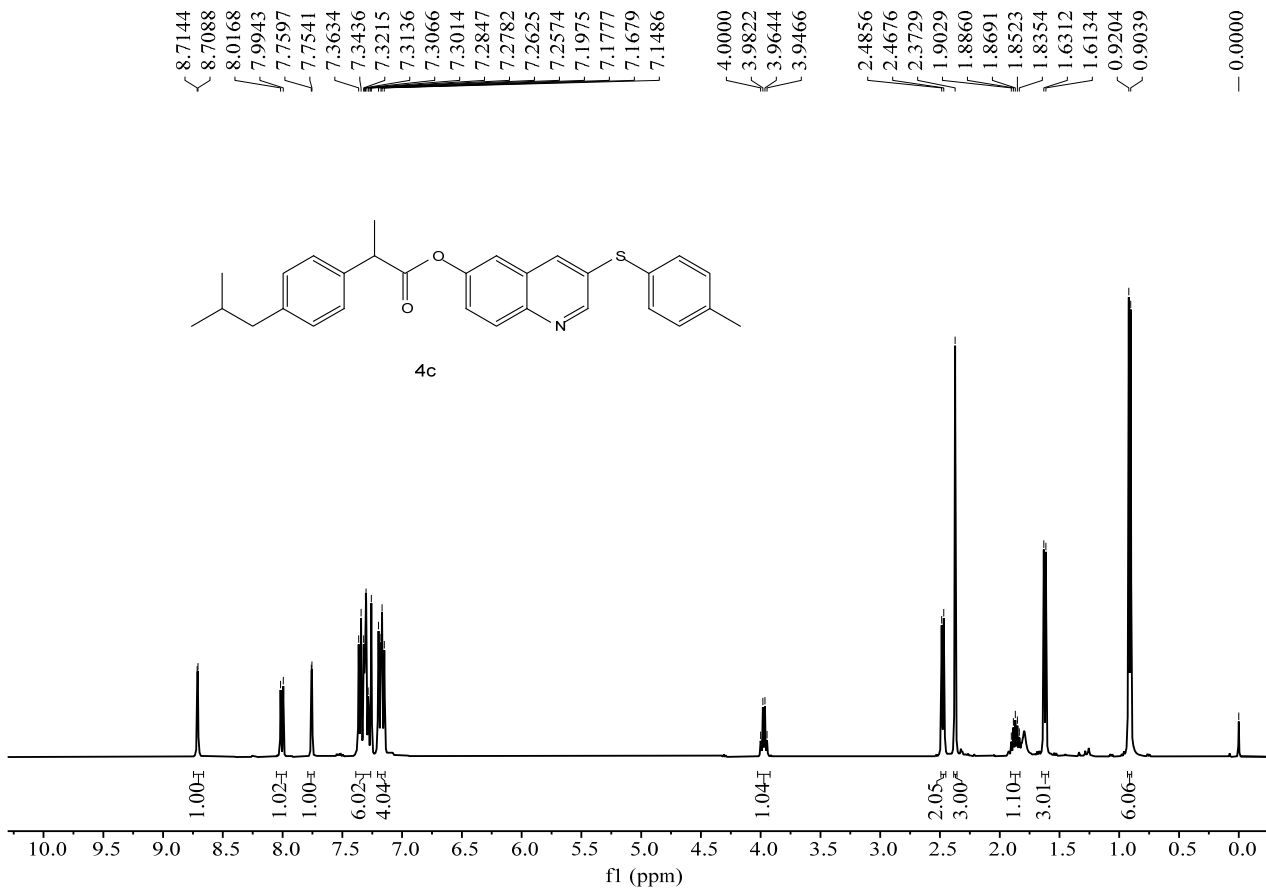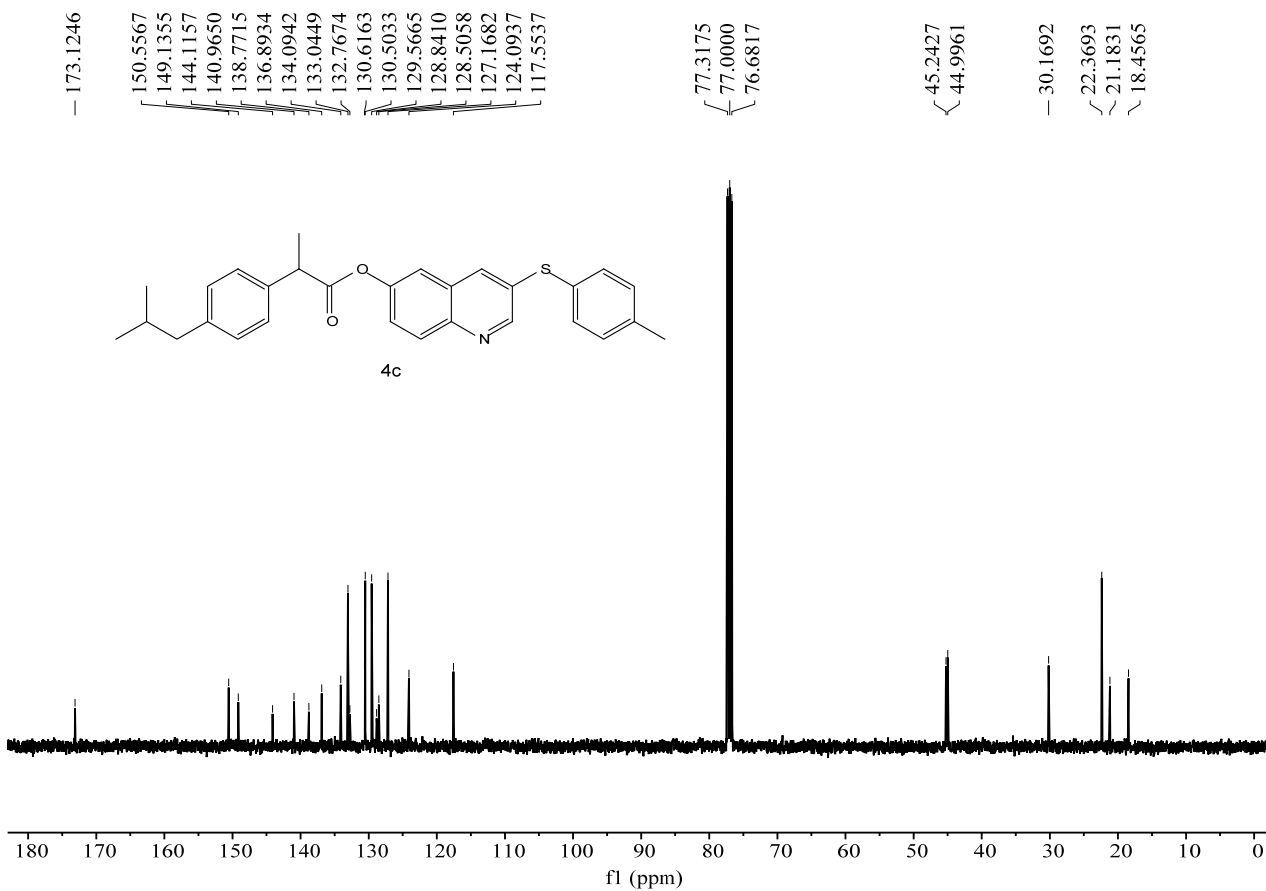



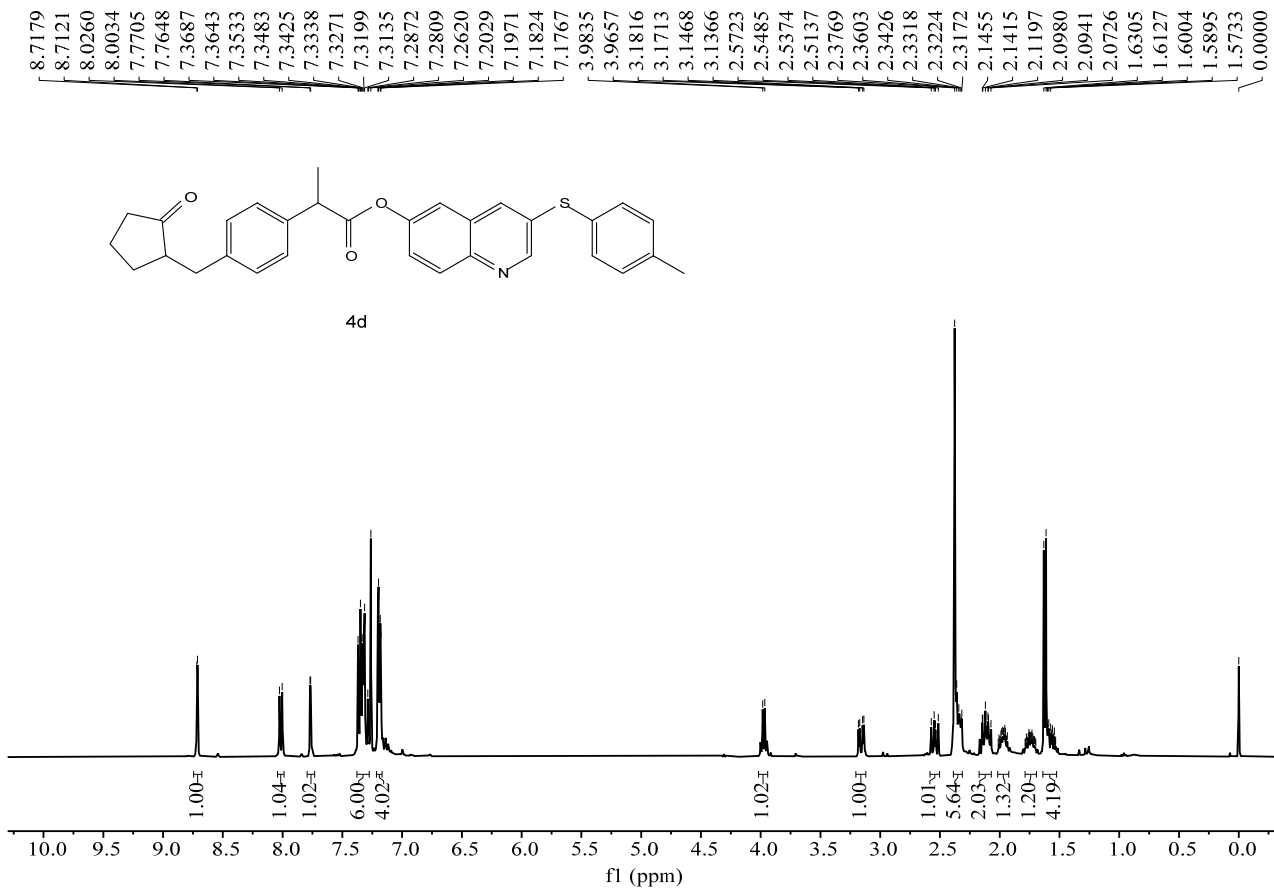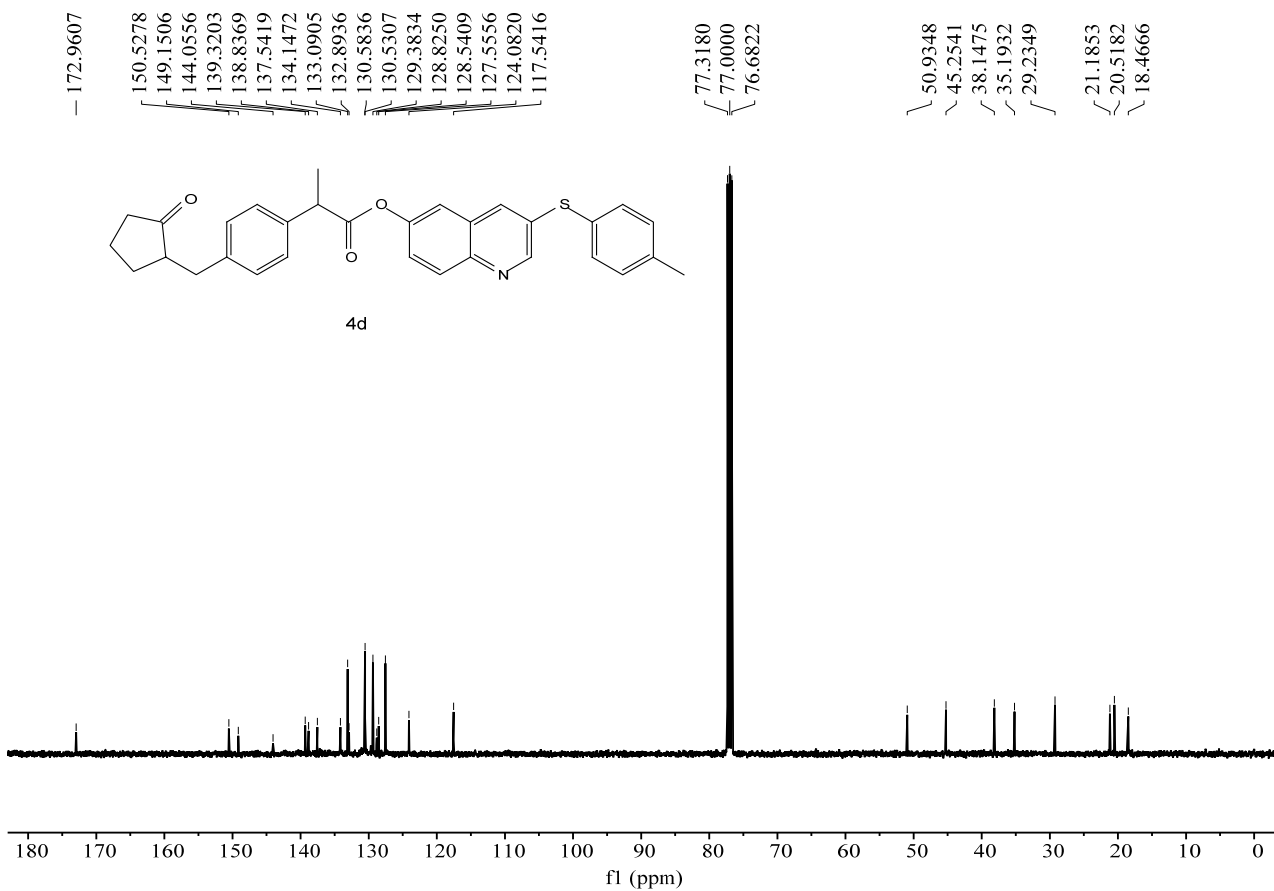

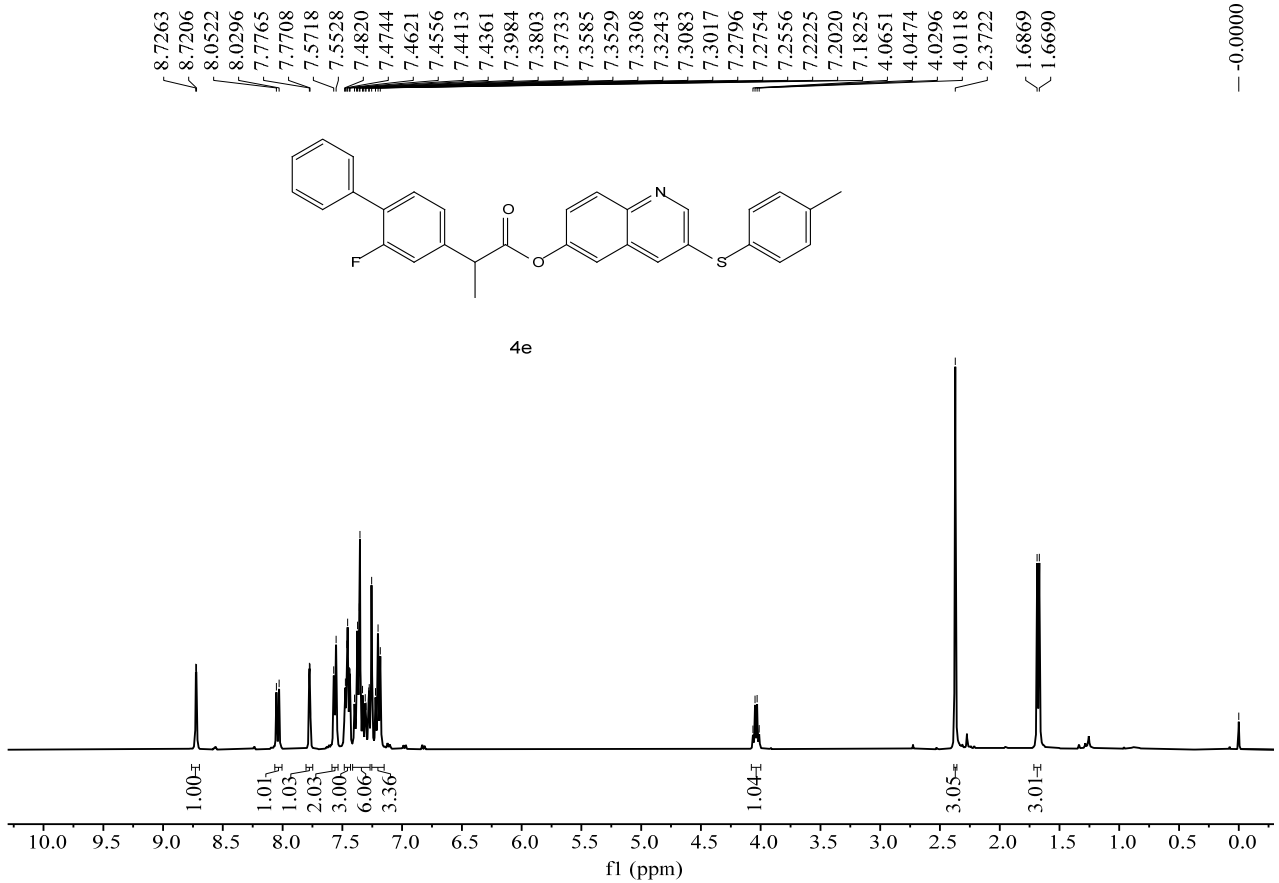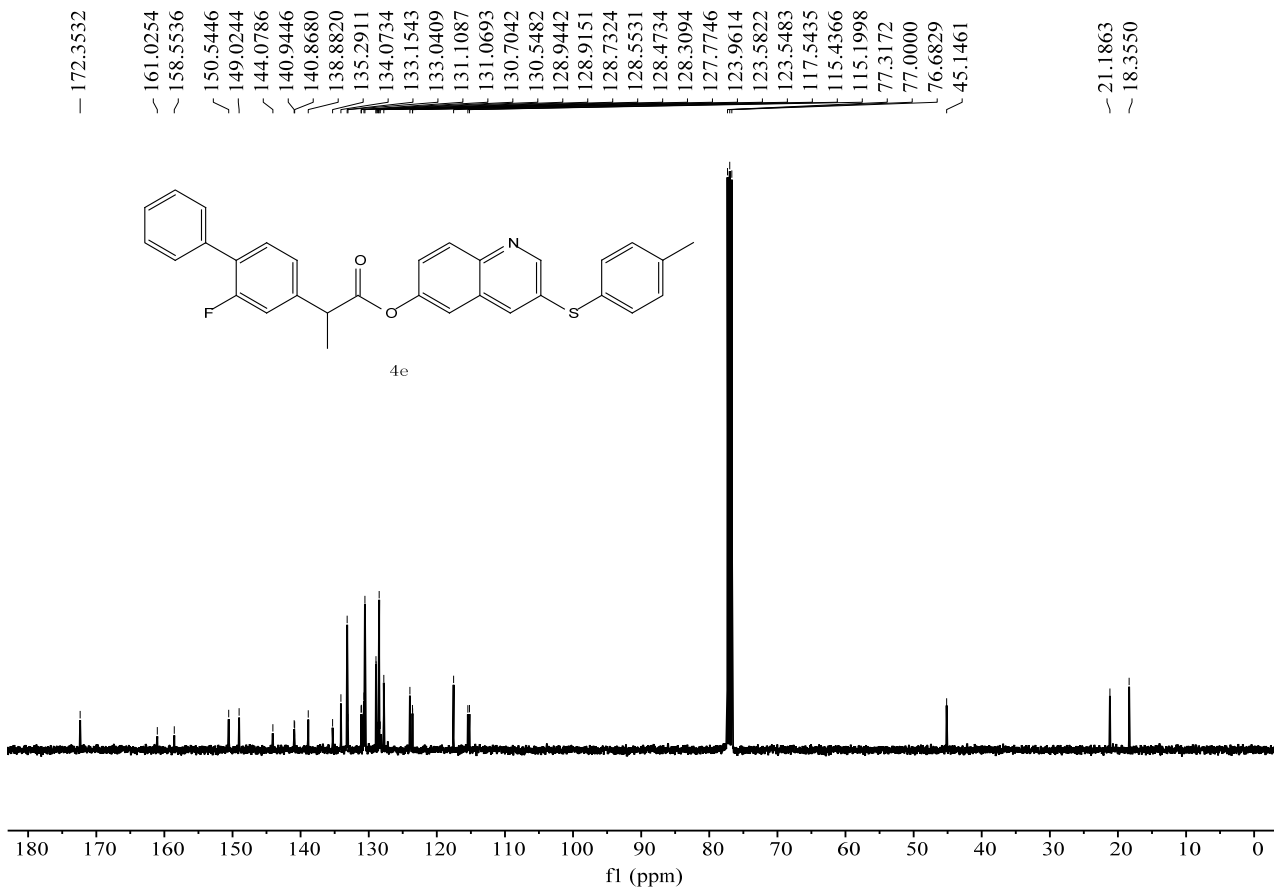

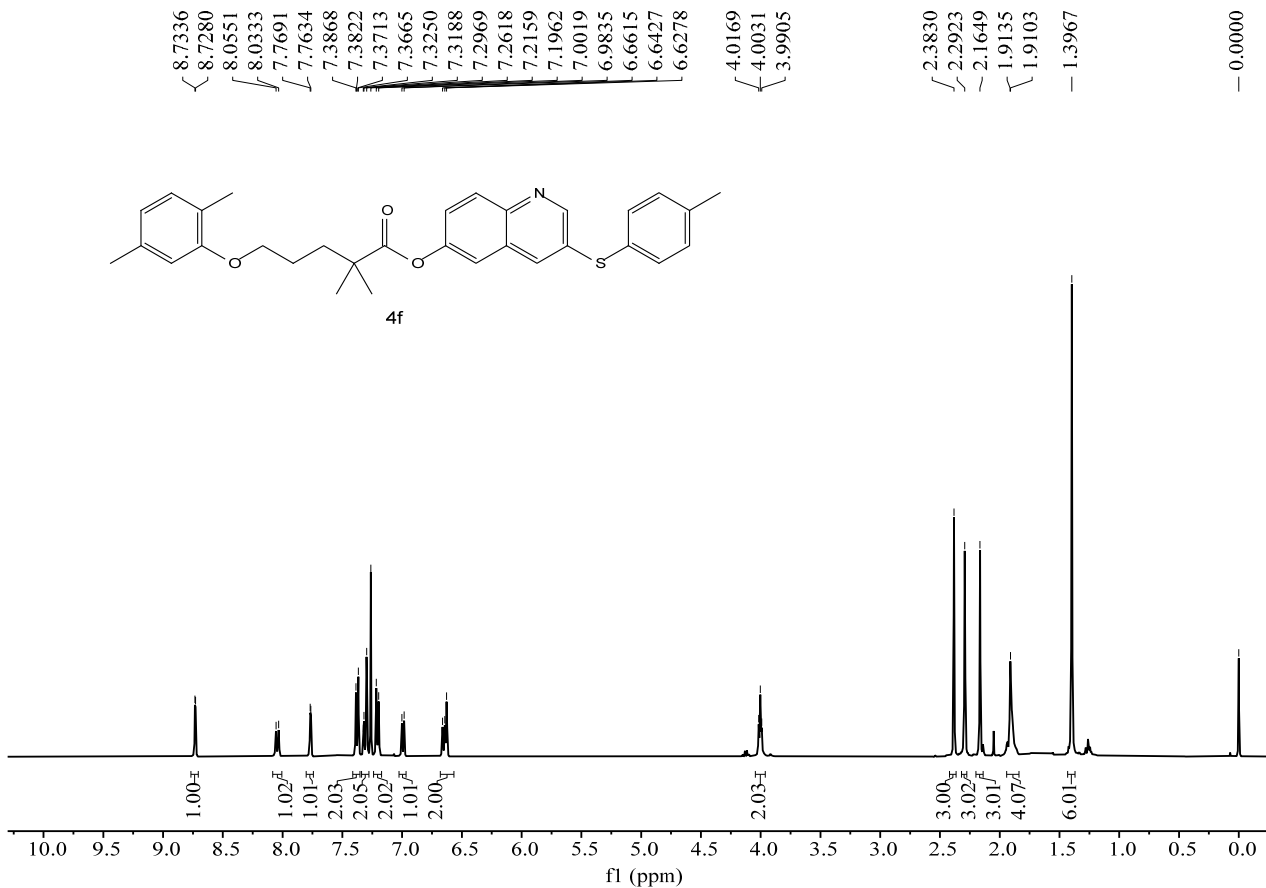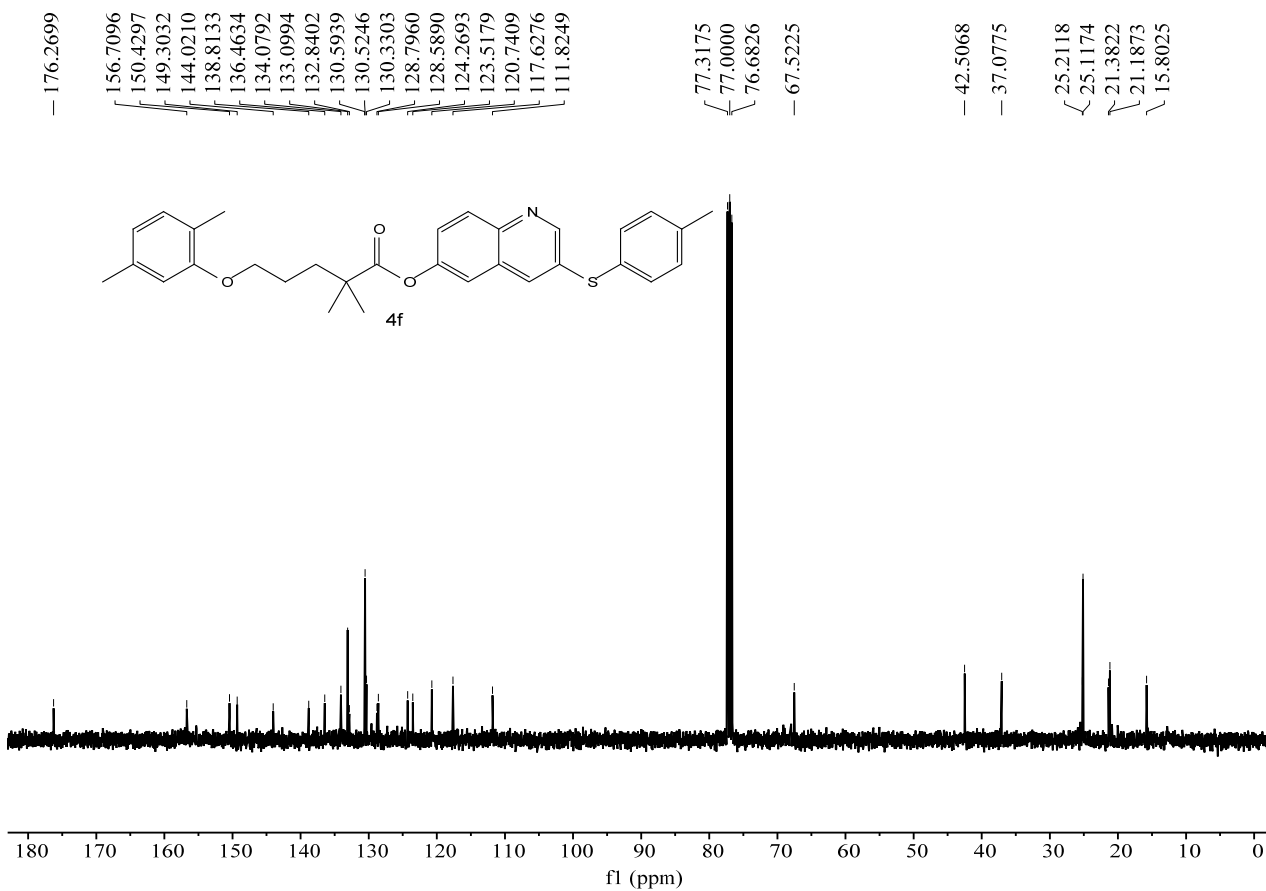

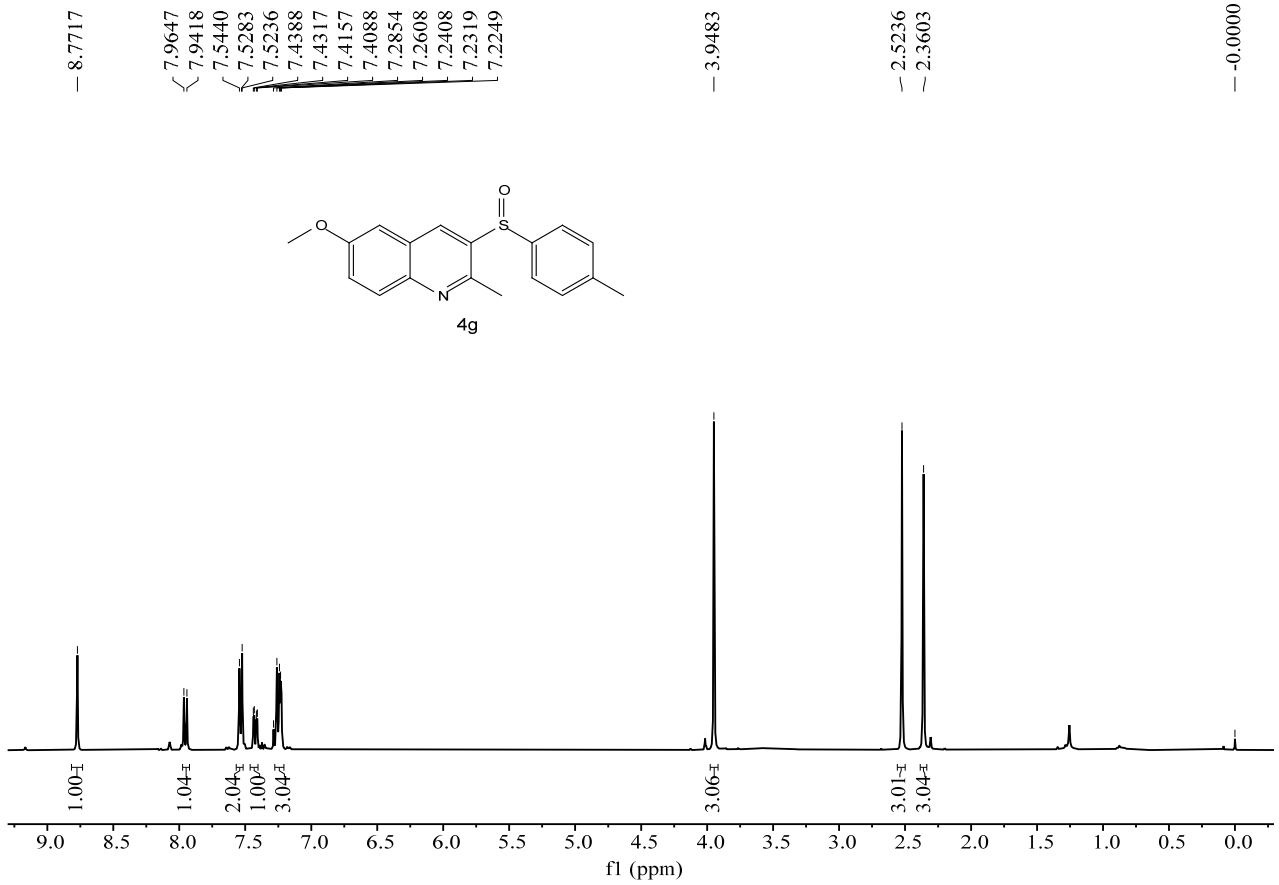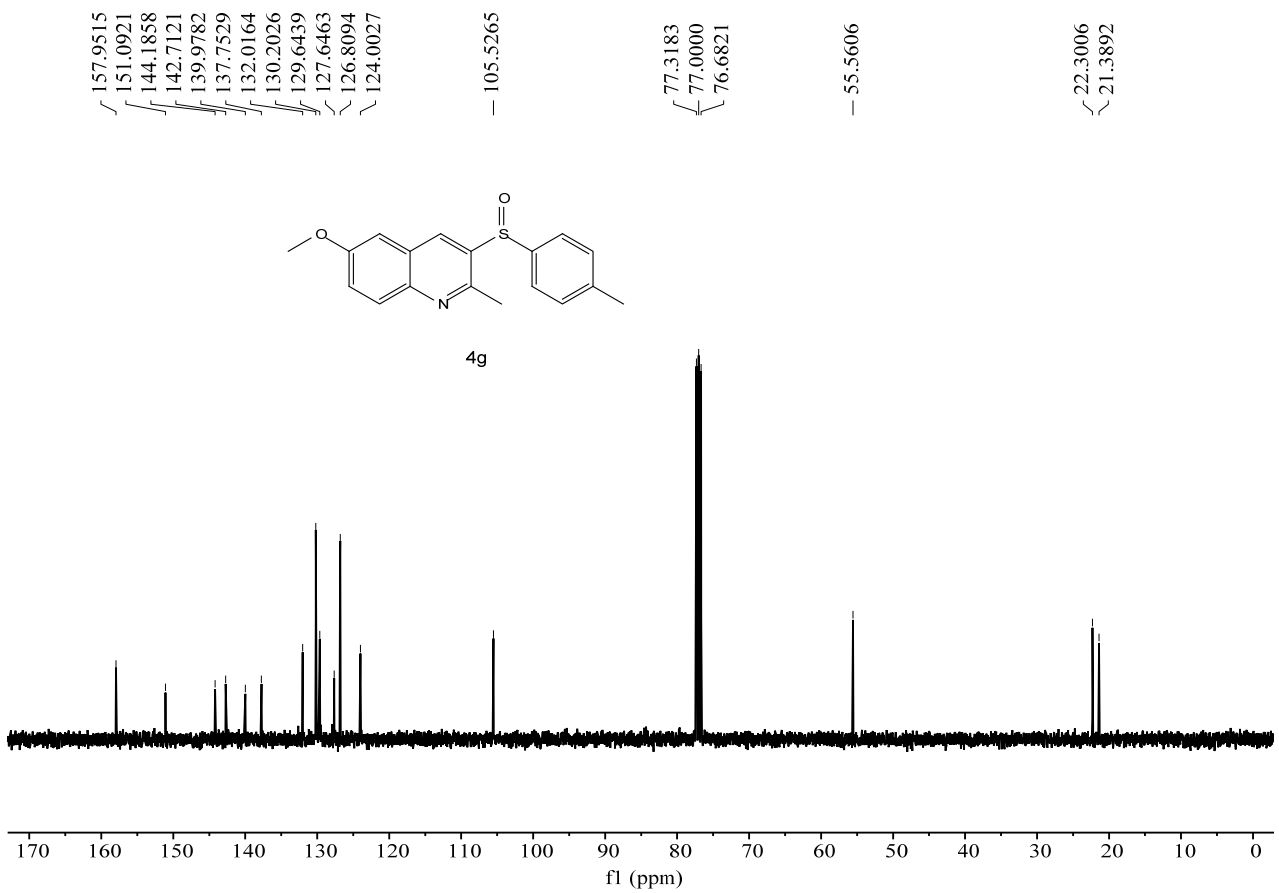

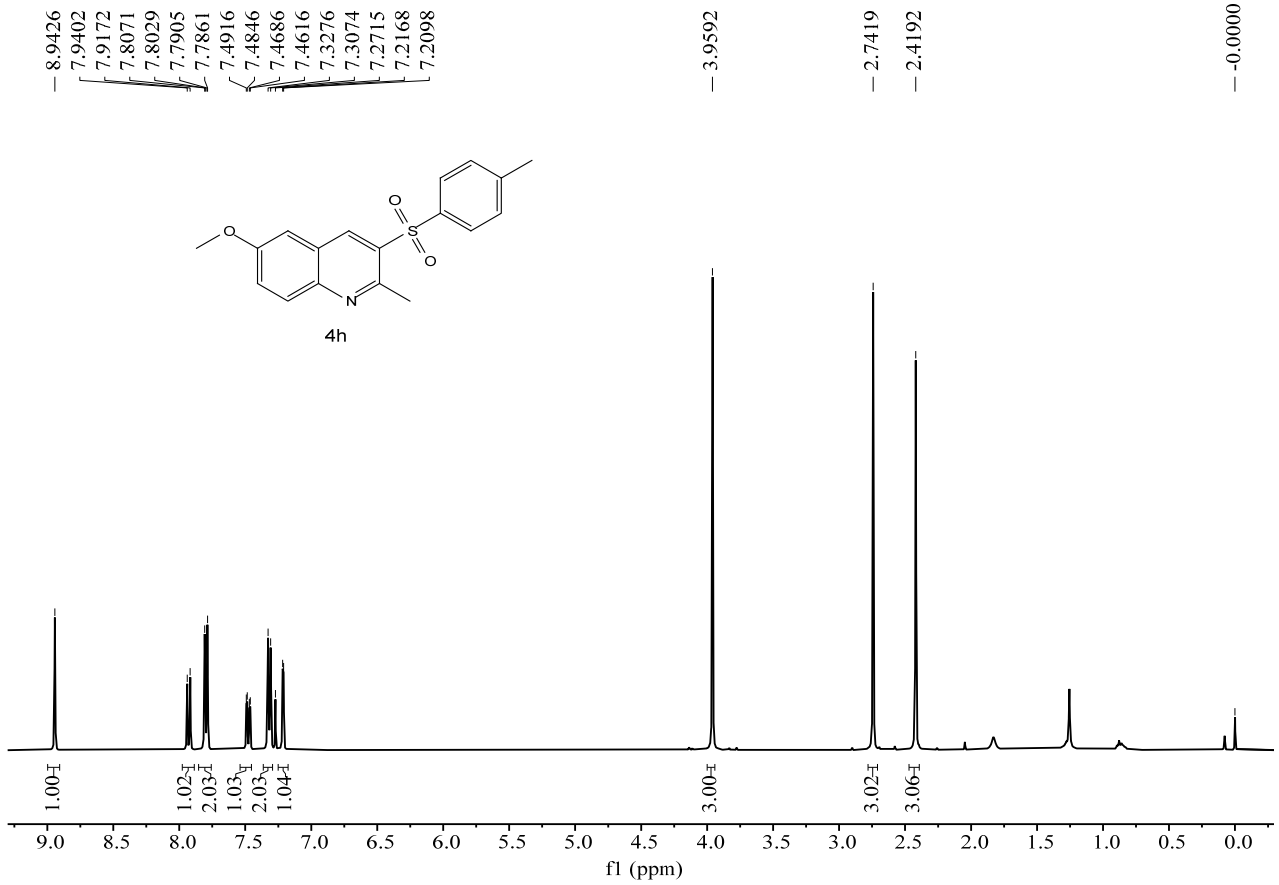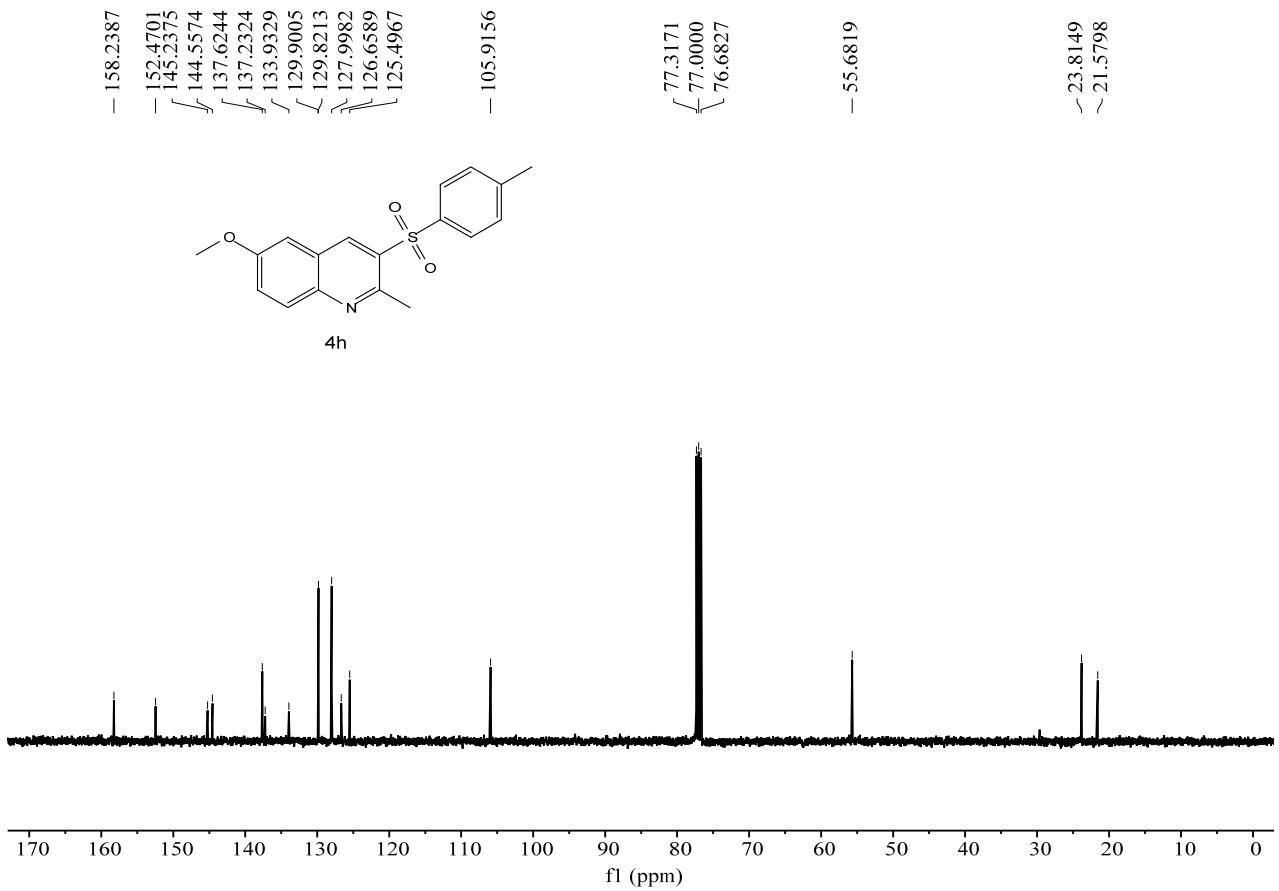

Supplement: d2qo00148a1.pdf [file d2qo00148a1.pdf]
